# Supplementary material
Source: PubMed Central journal article supplement (PMC6042093)
Supplement: pnas.1800442115.sapp.pdf [file pnas.1800442115.sapp.pdf]

## APPENDIX

# Effect of environmental changes on vegetable and legume yields and nutritional quality

*Pauline Scheelbeek, Frances Bird, Hanna Tuomisto, Rosemary Green, Francesca Harris, Edward Joy, Zaid Chalabi, Elizabeth Allen, Andy Haines, Alan Dangour*

## Contents

|                                                                                 |    |
|---------------------------------------------------------------------------------|----|
| Appendix 1a - Database Search Strategies Nutritional Quality .....              | 3  |
| Medline .....                                                                   | 3  |
| EMBASE.....                                                                     | 3  |
| AGRIS.....                                                                      | 4  |
| CAB Abstracts .....                                                             | 5  |
| GreenFile .....                                                                 | 5  |
| Web of Science.....                                                             | 6  |
| Scopus .....                                                                    | 7  |
| Appendix 1b - Database Search Strategies Yield .....                            | 8  |
| Medline .....                                                                   | 8  |
| EMBASE.....                                                                     | 8  |
| AGRIS.....                                                                      | 9  |
| CAB Abstracts .....                                                             | 10 |
| GreenFile .....                                                                 | 10 |
| Web of Science.....                                                             | 11 |
| Scopus .....                                                                    | 12 |
| Appendix 2 – Quality Assessment Criteria.....                                   | 13 |
| Appendix 3 – IPCC forecasts, evaluated exposures and standardised changes ..... | 14 |
| Appendix 4 – Overview of included papers in systematic review .....             | 15 |
| Appendix 5 – Results impact of ambient temperature .....                        | 37 |
| Appendix 6 – Scatter Plots for “Tipping Point” Analysis.....                    | 38 |
| Appendix 7 – Detailed Forest Plot Information Figure 3B and 4B.....             | 41 |
| Appendix 8 - Funnel Plots Meta-Analysis .....                                   | 43 |
| Appendix 9 – Additional Analyses Nutritional Quality.....                       | 47 |
| Appendix 10 – Results combined impact of multiple environmental exposures ..... | 52 |
| References.....                                                                 | 53 |

## Appendix 1a - Database Search Strategies Nutritional Quality

### Medline

1. ((climate adj1 (change\* OR variability OR disruption)) OR (land\* adj1 degradation) OR ((increas\* OR elevat\* OR fertili#ation) adj2 (carbon-dioxide OR carbondioxide OR "carbon dioxide" OR co2)) OR (soil adj2 (fertili#ation OR eutrophication)) OR "global warming" OR "greenhouse effect\*" OR ((water OR soil\*) adj4 (sodium OR salini#ation OR saline OR salinity)) OR global temperature\* OR (temperature\* adj2 (increase\* OR variab\* OR trend\*)) OR "extreme weather" OR "extreme temperature" OR (heatwave\* OR heat-wave\* OR "heat wave") OR (cold adj1 extreme\*) OR (rise adj4 (sea level OR sea-level OR sealevel)) OR flood\* OR "storm surge" OR landslide\* OR (wildfire\* OR wild-fire\* OR wild fire) OR windstorm\* OR cyclone\* OR (humidit\* adj2 (increas\* OR change\* OR elevation\* OR variabilit\* OR pattern\*)) OR "rainfall pattern\*" OR ((acid OR acidifi\*) adj1 rain\*) OR "carbon footprint" OR (ozone\* adj2 depletion) OR "climate pollutant\*" OR "extended drought\*" OR "cloud cover" OR (change adj2 ("land use" OR "land cover")) OR "soil erosion" OR "soil quality" OR (nutrient\* adj1 (run-off OR runoff OR "run off")) OR ((quality OR availability) adj1 (groundwater OR ground-water OR "ground water" OR freshwater OR fresh-water OR "fresh water" OR surfacewater OR surface-water OR "surface water" OR "irrigation water")) OR aquifer\* OR (water adj2 (availab\* OR security OR stress OR scarcity)) OR (water adj2 quality) OR biodivers\* OR "biological divers\*" OR pollinator\* OR ((bee OR bees OR insect OR insects) adj2 decline) OR "ecosystem\* change\*" OR "health of the planet" OR "environment\* change\*" OR (chemical adj1 contamination) OR (pest\* adj4 (crop\* OR plant\*)) OR (plant\* adj1 (pathogen\* OR disease\*))).ti,ab.
2. ((quality adj2 (crop OR vegetable OR fruit OR yield)) OR (taste adj2 (crop OR vegetable OR fruit)) OR ((micronutrient\* OR macronutrient\* OR nutrient\* OR nutrition\* OR nutritious OR nutriti\* OR vitamin\* OR mineral OR iron OR zinc OR calcium) adj2 (value\* OR content\* OR composition\* OR concentration\* OR quality)) OR (beta-carotene OR "beta carotene" OR betacarotene) OR (folate\* OR "folic acid\*" OR "folic-acid\*" OR folicacid\*) OR ("amino acid\*" OR "amino-acid\*" OR aminoacid\*)).ti,ab.

### EMBASE

1. ((climate adj1 (change\* OR variability OR disruption)) OR (land\* adj1 degradation) OR ((increas\* OR elevat\* OR fertili#ation) adj2 (carbon-dioxide OR carbondioxide OR "carbon dioxide" OR co2)) OR (soil adj2 (fertili#ation OR eutrophication)) OR "global warming" OR "greenhouse effect\*" OR ((water OR soil\*) adj4 (sodium OR salini#ation OR saline OR salinity)) OR global temperature\* OR (temperature\* adj2 (increase\* OR variab\* OR trend\*)) OR "extreme weather" OR "extreme temperature" OR (heatwave\* OR heat-wave\* OR "heat wave") OR (cold adj1 extreme\*) OR (rise adj4 (sea level OR sea-level OR sealevel)) OR flood\* OR "storm surge" OR landslide\* OR (wildfire\* OR wild-fire\* OR wild fire) OR windstorm\* OR cyclone\* OR (humidit\* adj2 (increas\* OR change\* OR elevation\* OR variabilit\* OR pattern\*)) OR "rainfall pattern\*" OR ((acid OR acidifi\*) adj1 rain\*) OR "carbon footprint" OR (ozone\* adj2 depletion) OR "climate pollutant\*" OR "extended drought\*" OR "cloud cover" OR (change adj2 ("land use" OR "land cover")) OR "soil erosion" OR "soil quality" OR (nutrient\* adj1 (run-off OR runoff OR "run off"))

- OR ((quality OR availability) adj1 (groundwater OR ground-water OR "ground water" OR freshwater OR fresh-water OR "fresh water" OR surfacewater OR surface-water OR "surface water" OR "irrigation water")) OR aquifer\* OR (water adj2 (availab\* OR security OR stress OR scarcity)) OR (water adj2 quality) OR biodivers\* OR "biological divers\*" OR pollinator\* OR ((bee OR bees OR insect OR insects) adj2 decline) OR "ecosystem\* change\*" OR "health of the planet" OR "environment\* change\*" OR (chemical adj1 contamination) OR (pest\* adj4 (crop\* OR plant\*)) OR (plant\* adj1 (pathogen\* OR disease\*))).ti,ab.
2. ((quality adj2 (crop OR vegetable OR fruit OR yield)) OR (taste adj2 (crop OR vegetable OR fruit)) OR ((micronutrient\* OR macronutrient\* OR nutrient\* OR nutrition\* OR nutritious OR nutriti\* OR vitamin\* OR mineral OR iron OR zinc OR calcium) adj2 (value\* OR content\* OR composition\* OR concentration\* OR quality)) OR (beta-carotene OR "beta carotene" OR betacarotene) OR (folate\* OR "folic acid\*" OR "folic-acid\*" OR folicacid\*) OR ("amino acid\*" OR "amino-acid\*" OR aminoacid\*)).ti,ab.
  3. (pulses OR banana\* OR tomato\* OR Orange\* OR mandarin\* OR apple\* OR grapes OR plantain\* OR Coconut\* OR Pineapple\* OR Lemon\* OR Lime\* OR citrus OR Grapefruit\* OR Dates OR Olive\* OR berries OR strawberr\* OR raspberr\* blackberr\* OR melon\* OR Cherry OR cherries OR Kiwi\* OR plum\* OR Pomegranate OR Peach\* OR avocado\* OR papaya\* OR pumpkin\* OR onion\* OR bean\* OR Peas OR Pepper\* OR piment\* OR Spinach OR Lettuce OR kale OR garlic OR broccoli OR sprout\*).ti,ab.

## AGRIS

1. ((climate adj1 (change\* OR variability OR disruption)) OR (land\* adj1 degradation) OR ((increas\* OR elevat\* OR fertili#ation) adj2 (carbon-dioxide OR carbondioxide OR "carbon dioxide" OR co2)) OR (soil adj2 (fertili#ation OR eutrophication)) OR "global warming" OR "greenhouse effect\*" OR ((water OR soil\*) adj4 (sodium OR salini#ation OR saline OR salinity)) OR global temperature\* OR (temperature\* adj2 (increase\* OR variab\* OR trend\*)) OR "extreme weather" OR "extreme temperature" OR (heatwave\* OR heat-wave\* OR "heat wave") OR (cold adj1 extreme\*) OR (rise adj4 (sea level OR sea-level OR sealevel)) OR flood\* OR "storm surge" OR landslide\* OR (wildfire\* OR wild-fire\* OR wild fire) OR windstorm\* OR cyclone\* OR (humidit\* adj2 (increas\* OR change\* OR elevation\* OR variabilit\* OR pattern\*)) OR "rainfall pattern\*" OR ((acid OR acidifi\*) adj1 rain\*) OR "carbon footprint" OR (ozone\* adj2 depletion) OR "climate pollutant\*" OR "extended drought\*" OR "cloud cover" OR (change adj2 ("land use" OR "land cover")) OR "soil erosion" OR "soil quality" OR (nutrient\* adj1 (run-off OR runoff OR "run off")) OR ((quality OR availability) adj1 (groundwater OR ground-water OR "ground water" OR freshwater OR fresh-water OR "fresh water" OR surfacewater OR surface-water OR "surface water" OR "irrigation water")) OR aquifer\* OR (water adj2 (availab\* OR security OR stress OR scarcity)) OR (water adj2 quality) OR biodivers\* OR "biological divers\*" OR pollinator\* OR ((bee OR bees OR insect OR insects) adj2 decline) OR "ecosystem\* change\*" OR "health of the planet" OR "environment\* change\*" OR (chemical adj1 contamination) OR (pest\* adj4 (crop\* OR plant\*)) OR (plant\* adj1 (pathogen\* OR disease\*))).ti,ab.
2. ((quality adj2 (crop OR vegetable OR fruit OR yield)) OR (taste adj2 (crop OR vegetable OR fruit)) OR ((micronutrient\* OR macronutrient\* OR nutrient\* OR nutrition\* OR nutritious OR nutriti\* OR vitamin\* OR mineral OR iron OR zinc OR calcium) adj2 (value\* OR content\* OR composition\* OR concentration\* OR quality)) OR (beta-carotene OR "beta carotene" OR betacarotene) OR (folate\* OR "folic acid\*" OR "folic-acid\*" OR folicacid\*) OR ("amino acid\*" OR "amino-acid\*" OR aminoacid\*)).ti,ab.

OR concentration\* OR quality)) OR (beta-carotene OR "beta carotene" OR betacarotene) OR (folate\* OR "folic acid\*" OR "folic-acid\*" OR folicacid\*) OR ("amino acid\*" OR "amino-acid\*" OR aminoacid\*).ti,ab.

3. (pulses OR banana\* OR tomato\* OR Orange\* OR mandarin\* OR apple\* OR grapes OR plantain\* OR Coconut\* OR Pineapple\* OR Lemon\* OR Lime\* OR citrus OR Grapefruit\* OR Dates OR Olive\* OR berries OR strawberr\* OR raspberr\* blackberr\* OR melon\* OR Cherry OR cherries OR Kiwi\* OR plum\* OR Pomegranate OR Peach\* OR avocado\* OR papaya\* OR pumpkin\* OR onion\* OR bean\* OR Peas OR Pepper\* OR piment\* OR Spinach OR Lettuce OR kale OR garlic OR broccoli OR sprout\*).ti,ab.

## CAB Abstracts

1. ((climate adj1 (change\* OR variability OR disruption)) OR (land\* adj1 degradation) OR ((increas\* OR elevat\* OR fertili#ation) adj2 (carbon-dioxide OR carbondioxide OR "carbon dioxide" OR co2)) OR (soil adj2 (fertili#ation OR eutrophication)) OR "global warming" OR "greenhouse effect\*" OR ((water OR soil\*) adj4 (sodium OR salini#ation OR saline OR salinity)) OR global temperature\* OR (temperature\* adj2 (increase\* OR variab\* OR trend\*)) OR "extreme weather" OR "extreme temperature" OR (heatwave\* OR heat-wave\* OR "heat wave") OR (cold adj1 extreme\*) OR (rise adj4 (sea level OR sea-level OR sealevel)) OR flood\* OR "storm surge" OR landslide\* OR (wildfire\* OR wild-fire\* OR wild fire) OR windstorm\* OR cyclone\* OR (humidit\* adj2 (increas\* OR change\* OR elevation\* OR variabilit\* OR pattern\*)) OR "rainfall pattern\*" OR ((acid OR acidifi\*) adj1 rain\*) OR "carbon footprint" OR (ozone\* adj2 depletion) OR "climate pollutant\*" OR "extended drought\*" OR "cloud cover" OR (change adj2 ("land use" OR "land cover")) OR "soil erosion" OR "soil quality" OR (nutrient\* adj1 (run-off OR runoff OR "run off")) OR ((quality OR availability) adj1 (groundwater OR ground-water OR "ground water" OR freshwater OR fresh-water OR "fresh water" OR surfacewater OR surface-water OR "surface water" OR "irrigation water")) OR aquifer\* OR (water adj2 (availab\* OR security OR stress OR scarcity)) OR (water adj2 quality) OR biodivers\* OR "biological divers\*" OR pollinator\* OR ((bee OR bees OR insect OR insects) adj2 decline) OR "ecosystem\* change\*" OR "health of the planet" OR "environment\* change\*" OR (chemical adj1 contamination) OR (pest\* adj4 (crop\* OR plant\*)) OR (plant\* adj1 (pathogen\* OR disease\*))).ti,ab.
2. ((quality adj2 (crop OR vegetable OR fruit OR yield)) OR (taste adj2 (crop OR vegetable OR fruit)) OR ((micronutrient\* OR macronutrient\* OR nutrient\* OR nutrition\* OR nutritious OR nutriti\* OR vitamin\* OR mineral OR iron OR zinc OR calcium) adj2 (value\* OR content\* OR composition\* OR concentration\* OR quality)) OR (beta-carotene OR "beta carotene" OR betacarotene) OR (folate\* OR "folic acid\*" OR "folic-acid\*" OR folicacid\*) OR ("amino acid\*" OR "amino-acid\*" OR aminoacid\*).ti,ab.
3. (pulses OR banana\* OR tomato\* OR Orange\* OR mandarin\* OR apple\* OR grapes OR plantain\* OR Coconut\* OR Pineapple\* OR Lemon\* OR Lime\* OR citrus OR Grapefruit\* OR Dates OR Olive\* OR berries OR strawberr\* OR raspberr\* blackberr\* OR melon\* OR Cherry OR cherries OR Kiwi\* OR plum\* OR Pomegranate OR Peach\* OR avocado\* OR papaya\* OR pumpkin\* OR onion\* OR bean\* OR Peas OR Pepper\* OR piment\* OR Spinach OR Lettuce OR kale OR garlic OR broccoli OR sprout\*).ti,ab.

## GreenFile

1. ((climate N1 (change\* OR variability OR disruption)) OR (land\* N1 degradation) OR ((increas\* OR elevat\* OR fertilisation OR fertilization) N2 (carbon-dioxide OR carbondioxide OR "carbon dioxide" OR co2)) OR (soil N2 (fertilisation OR fertilization OR eutrophication)) OR "global warming" OR "greenhouse effect\*" OR ((water OR soil\*) N4 (sodium OR salinisation OR salinization OR saline OR salinity)) OR global temperature\* OR (temperature\* N2 (increase\* OR variab\* OR trend\*)) OR "extreme weather" OR "extreme temperature" OR (heatwave\* OR heat-wave\* OR "heat wave") OR (cold N1 extreme\*) OR (rise N4 (sea level OR sea-level OR sealevel)) OR flood\* OR "storm surge" OR landslide\* OR (wildfire\* OR wild-fire\* OR wild fire) OR windstorm\* OR cyclone\* OR (humidit\* N2 (increas\* OR change\* OR elevation\* OR variabilit\* OR pattern\*)) OR "rainfall pattern\*" OR ((acid OR acidifi\*) N1 rain\*) OR "carbon footprint" OR (ozone\* N2 depletion) OR "climate pollutant\*" OR "extended drought\*" OR "cloud cover" OR (change N2 ("land use" OR "land cover")) OR "soil erosion" OR "soil quality" OR (nutrient\* N1 (run-off OR runoff OR "run off")) OR ((quality OR availability) N1 (groundwater OR ground-water OR "ground water" OR freshwater OR fresh-water OR "fresh water" OR surfacewater OR surface-water OR "surface water" OR "irrigation water")) OR aquifer\* OR (water N2 (availab\* OR security OR stress OR scarcity)) OR (water N2 quality) OR biodivers\* OR "biological divers\*" OR pollinator\* OR ((bee OR bees OR insect OR insects) N2 decline) OR "ecosystem\* change\*" OR "health of the planet" OR "environment\* change\*" OR (chemical N1 contamination) OR (pest\* N4 (crop\* OR plant\*)) OR (plant\* N1 (pathogen\* OR disease\*)))
2. ((quality N2 (crop OR vegetable OR fruit OR yield)) OR (taste N2 (crop OR vegetable OR fruit)) OR ((micronutrient\* OR macronutrient\* OR nutrient\* OR nutrition\* OR nutritious OR nutriti\* OR vitamin\* OR mineral OR iron OR zinc OR calcium) N2 (value\* OR content\* OR composition\* OR concentration\* OR quality)) OR (beta-carotene OR "beta carotene" OR betacarotene) OR (folate\* OR "folic acid\*" OR "folic-acid\*" OR folicacid\*) OR ("amino acid\*" OR "amino-acid\*" OR aminoacid\*))

## Web of Science

1. TS=(((climate near/1 (change\* OR variability OR disruption)) OR (land\* near/1 degradation) OR ((increas\* OR elevat\* OR fertili?ation) near/2 (carbon-dioxide OR carbondioxide OR "carbon dioxide" OR co2)) OR (soil near/2 (fertili?ation OR eutrophication)) OR "global warming" OR "greenhouse effect\*" OR ((water OR soil\*) near/4 (sodium OR salini?ation OR saline OR salinity)) OR global temperature\* OR (temperature\* near/2 (increase\* OR variab\* OR trend\*)) OR "extreme weather" OR "extreme temperature" OR (heatwave\* OR heat-wave\* OR "heat wave") OR (cold near/1 extreme\*) OR (rise near/4 (sea level OR sea-level OR sealevel)) OR flood\* OR "storm surge" OR landslide\* OR (wildfire\* OR wild-fire\* OR wild fire) OR windstorm\* OR cyclone\* OR (humidit\* near/2 (increas\* OR change\* OR elevation\* OR variabilit\* OR pattern\*)) OR "rainfall pattern\*" OR ((acid OR acidifi\*) near/1 rain\*) OR "carbon footprint" OR (ozone\* near/2 depletion) OR "climate pollutant\*" OR "extended drought\*" OR "cloud cover" OR (change near/2 ("land use" OR "land cover")) OR "soil erosion" OR "soil quality" OR (nutrient\* near/1 (run-off OR runoff OR "run off")) OR ((quality OR availability) near/1 (groundwater OR ground-water OR "ground water" OR freshwater OR fresh-water OR "fresh water" OR surfacewater OR surface-water OR "surface water" OR "irrigation water")) OR aquifer\* OR (water near/2 (availab\* OR security OR stress OR scarcity)) OR (water near/2

- quality) OR biodivers\* OR "biological divers\*" OR pollinator\* OR ((bee OR bees OR insect OR insects) near/2 decline) OR "ecosystem\* change\*" OR "health of the planet" OR "environment\* change\*" OR (chemical near/1 contamination) OR (pest\* near/4 (crop\* OR plant\*)) OR (plant\* near/1 (pathogen\* OR disease\*))
2. TS=((quality near/2 (crop OR vegetable OR fruit OR yield)) OR (taste near/2 (crop OR vegetable OR fruit)) OR ((micronutrient\* OR macronutrient\* OR nutrient\* OR nutrition\* OR nutritious OR nutriti\* OR vitamin\* OR mineral OR iron OR zinc OR calcium) near/2 (value\* OR content\* OR composition\* OR concentration\* OR quality)) OR (beta-carotene OR "beta carotene" OR betacarotene) OR (folate\* OR "folic acid\*" OR "folic-acid\*" OR folicacid\*) OR ("amino acid\*" OR "amino-acid\*" OR aminoacid\*))
  3. TS=(pulses OR banana\* OR tomato\* OR Orange\* OR mandarin\* OR apple\* OR grapes OR plantain\* OR Coconut\* OR Pineapple\* OR Lemon\* OR Lime\* OR citrus OR Grapefruit\* OR Dates OR Olive\* OR berries OR strawberr\* OR raspberr\* blackberr\* OR melon\* OR Cherry OR cherries OR Kiwi\* OR plum\* OR Pomegranate OR Peach\* OR avocado\* OR papaya\* OR pumpkin\* OR onion\* OR bean\* OR Peas OR Pepper\* OR piment\* OR Spinach OR Lettuce OR kale OR garlic OR broccoli OR sprout\*)

## Scopus

1. ((climate W/1 (change\* OR variability OR disruption)) OR (land\* W/1 degradation) OR ((increas\* OR elevat\* OR fertili?ation) W/2 (carbon-dioxide OR carbondioxide OR "carbon dioxide" OR co2)) OR (soil W/2 (fertili?ation OR eutrophication)) OR "global warming" OR "greenhouse effect\*" OR ((water OR soil\*) W/4 (sodium OR salini?ation OR saline OR salinity)) OR global temperature\* OR (temperature\* W/2 (increase\* OR variab\* OR trend\*)) OR "extreme weather" OR "extreme temperature" OR (heatwave\* OR heat-wave\* OR "heat wave") OR (cold W/1 extreme\*) OR (rise W/4 (sea level OR sea-level OR sealevel)) OR flood\* OR "storm surge" OR landslide\* OR (wildfire\* OR wild-fire\* OR wild fire) OR windstorm\* OR cyclone\* OR (humidit\* W/2 (increas\* OR change\* OR elevation\* OR variabilit\* OR pattern\*)) OR "rainfall pattern\*" OR ((acid OR acidifi\*) W/1 rain\*) OR "carbon footprint" OR (ozone\* W/2 depletion) OR "climate pollutant\*" OR "extended drought\*" OR "cloud cover" OR (change W/2 ("land use" OR "land cover")) OR "soil erosion" OR "soil quality" OR (nutrient\* W/1 (run-off OR runoff OR "run off")) OR ((quality OR availability) W/1 (groundwater OR ground-water OR "ground water" OR freshwater OR fresh-water OR "fresh water" OR surfacewater OR surface-water OR "surface water" OR "irrigation water")) OR aquifer\* OR (water W/2 (availab\* OR security OR stress OR scarcity)) OR (water W/2 quality) OR biodivers\* OR "biological divers\*" OR pollinator\* OR ((bee OR bees OR insect OR insects) W/2 decline) OR "ecosystem\* change\*" OR "health of the planet" OR "environment\* change\*" OR (chemical W/1 contamination) OR (pest\* W/4 (crop\* OR plant\*)) OR (plant\* W/1 (pathogen\* OR disease\*))).ti,ab.
2. ((quality W/2 (crop OR vegetable OR fruit OR yield)) OR (taste W/2 (crop OR vegetable OR fruit)) OR ((micronutrient\* OR macronutrient\* OR nutrient\* OR nutrition\* OR nutritious OR nutriti\* OR vitamin\* OR mineral OR iron OR zinc OR calcium) W/2 (value\* OR content\* OR composition\* OR concentration\* OR quality)) OR (beta-carotene OR "beta carotene" OR betacarotene) OR (folate\* OR "folic acid\*" OR "folic-acid\*" OR folicacid\*) OR ("amino acid\*" OR "amino-acid\*" OR aminoacid\*)).ti,ab.

## Appendix 1b - Database Search Strategies Yield

### Medline

1. (climate adj1 (change OR variability OR disruption OR warming)) OR (global adj1 (warming OR temperature)) OR "greenhouse effect" OR "elevated CO2" OR ((increas\* OR elevat\* OR fertilisation OR fertilization) adj2 (carbon-dioxide OR carbondioxide OR "carbon dioxide" OR CO2)) OR "carbon footprint" OR (ozone adj2 depletion) OR climate pollutant OR (soil adj2 (fertilisation OR fertilization OR eutrophication)) OR ((soil OR water) adj4 (sodium OR salinisation OR salinization OR salin\*)) OR (temperature adj2 (increas\* OR variability OR trend) OR extreme weather OR extreme temperature OR heatwave OR heat-wave OR (cold adj1 extreme) OR (("sea level" OR sea-level OR sealevel) adj4 rise) OR flood OR "storm surge" OR landslide OR wildfire OR wild-fire OR tropical cyclone OR windstorm OR (humidity adj2 (increas\* OR change OR elevat\* OR variability OR pattern)) OR "rainfall pattern" OR "acid rain" OR "drought stress" OR "water stress" OR "water scarcity" OR "extended drought" OR "cloud cover" OR (change adj1 ("land use" OR land-use OR "land cover")) OR soil erosion OR soil quality OR "nutrient run-off" OR ((quality OR availability) adj1 (groundwater OR ground-water OR "ground water" OR freshwater OR fresh-water OR "fresh water")) OR aquifer OR "water security" OR (water adj2 availab\*) OR (water adj2 quality) OR biodivers\* OR biological divers\* OR pollinat\* OR ((bee OR insect) adj2 decline)) OR "ecosystem change" OR "health of the planet" OR planet\* health OR environment\* change OR (chemical adj1 contamination) OR (pest adj4 (crop OR plant)) OR (plant adj1 (pathogen OR disease))
2. fruit OR watermelon OR banana OR apple OR grape OR orange OR tangerine OR mandarin OR satsuma OR clementine OR citrus OR coconut OR mango OR mangosteen OR guava OR melon OR pear OR pineapple OR vegetable OR bean OR tomato OR onion OR cabbage OR cucumber OR gherkin OR eggplant OR aubergine OR carrot OR turnip OR pepper OR lettuce OR garlic OR brassica OR allium
3. (yield adj3 change) OR "crop production" OR "crop growth" OR producti\* OR growth OR yield OR harvest OR biomass OR "dry weight" OR "fresh weight"

### EMBASE

1. (climate adj1 (change OR variability OR disruption OR warming)) OR (global adj1 (warming OR temperature)) OR "greenhouse effect" OR "elevated CO2" OR ((increas\* OR elevat\* OR fertilisation OR fertilization) adj2 (carbon-dioxide OR carbondioxide OR "carbon dioxide" OR CO2)) OR "carbon footprint" OR (ozone adj2 depletion) OR climate pollutant OR (soil adj2 (fertilisation OR fertilization OR eutrophication)) OR ((soil OR water) adj4 (sodium OR salinisation OR salinization OR salin\*)) OR (temperature adj2 (increas\* OR variability OR trend) OR extreme weather OR extreme temperature OR heatwave OR heat-wave OR (cold adj1 extreme) OR (("sea level" OR sea-level OR sealevel) adj4 rise) OR flood OR "storm surge" OR landslide OR wildfire OR wild-fire OR tropical cyclone OR windstorm OR (humidity adj2 (increas\* OR change OR elevat\* OR variability OR pattern)) OR "rainfall pattern" OR "acid rain" OR "drought stress" OR "water stress" OR "water scarcity" OR "extended drought" OR "cloud cover" OR (change adj1 ("land



use" OR land-use OR "land cover")) OR soil erosion OR soil quality OR "nutrient run-off" OR ((quality OR availability) adj1 (groundwater OR ground-water OR "ground water" OR freshwater OR fresh-water OR "fresh water")) OR aquifer OR "water security" OR (water adj2 availab\*) OR (water adj2 quality) OR biodivers\* OR biological divers\* OR pollinat\* OR ((bee OR insect) adj2 decline)) OR "ecosystem change" OR "health of the planet" OR planet\* health OR environment\* change OR (chemical adj1 contamination) OR (pest adj4 (crop OR plant)) OR (plant adj1 (pathogen OR disease))

2. fruit OR watermelon OR banana OR apple OR grape OR orange OR tangerine OR mandarin OR satsuma OR clementine OR citrus OR coconut OR mango OR mangosteen OR guava OR melon OR pear OR pineapple OR vegetable OR bean OR tomato OR onion OR cabbage OR cucumber OR gherkin OR eggplant OR aubergine OR carrot OR turnip OR pepper OR lettuce OR garlic OR brassica OR allium
3. (yield adj3 change) OR "crop production" OR "crop growth" OR producti\* OR growth OR yield OR harvest OR biomass OR "dry weight" OR "fresh weight"

## AGRIS

1. (((("climate change"~1) OR ("climate variability"~1) OR ("climate disruption"~1) OR ("climate warming" ~1) OR ("global warming" ~1) OR ("global temperature" ~1) OR "greenhouse effect" OR "elevated CO2" OR ("increas\* carbon-dioxide" ~2) OR ("increas\* carbondioxide" ~2) OR ("increas\* carbon dioxide" ~2) OR ("increas\* CO2" ~2) OR ("elevat\* carbon-dioxide" ~2) OR ("elevat\* carbondioxide" ~2) OR ("elevat\* carbon dioxide" ~2) OR ("elevat\* CO2" ~2) OR ("fertili?ation carbon-dioxide" ~2) OR ("fertili?ation carbondioxide" ~2) OR ("fertili?ation carbon dioxide"~2) OR ("fertili?ation CO2" ~2) OR "carbon footprint" OR ("ozone\* depletion" ~2) OR climate pollutant OR ("soil fertili?ation" ~2) OR ("soil eutrophication" ~2) OR ("soil sodium" ~4) OR ("soil salini?ation" ~4) OR ("soil salin\*" ~4) OR ("water sodium" ~4) OR ("water salini?ation" ~4) OR ("water salin\*" ~4) OR ("temperature increas\*" ~2) OR ("temperature variability" ~2) OR ("temperature trend" ~2) OR extreme weather OR extreme temperature OR heatwave OR heat-wave OR ("cold extreme" ~1) OR ("sea level rise" ~4) OR ("sea-level rise" ~4) OR ("sealevel rise" ~4) OR flood OR "storm surge" OR landslide OR wildfire OR wild-fire OR tropical cyclone OR windstorm OR ("humidity increase" ~2) OR ("humidity change" ~2) OR ("humidity elevat\*" ~2) OR ("humidity variability" ~2) OR ("humidity pattern" ~2) OR "rainfall pattern" OR "acid rain" OR "drought stress" OR "water stress" OR "water scarcity" OR "extended drought" OR "cloud cover" OR ("change land use" ~1) OR ("change land-use" ~1) OR ("change land cover" ~1) OR soil erosion OR soil quality OR "nutrient run-off" OR ("quality groundwater" ~1) OR ("quality ground-water" ~1) OR ("quality ground water" ~1) OR ("quality freshwater" ~1) OR ("quality fresh-water" ~1) OR ("quality fresh water" ~1) OR ("availability groundwater" ~1) OR ("availability ground-water" ~1) OR ("availability ground water" ~1) OR ("availability freshwater" ~1) OR ("availability fresh-water" ~1) OR ("availability fresh water" ~1) OR aquifer OR "water security" OR ("water availab\*" ~2) OR ("water quality" ~2) OR biodiverse\* OR biological divers\* OR pollinat\* OR (bee W/2 decline) OR ("insect decline" ~2) OR "ecosystem change" OR "health of

- the planet" OR planet\* health OR environment\* change OR ("chemical contamination" ~1) OR ("pest crop" ~4) OR ("pest plant" ~4) OR ("plant pathogen" ~1) OR ("plant disease" ~1))
2. (fruit OR watermelon OR banana OR apple OR grape OR orange OR tangerine OR mandarin OR satsuma OR clementine OR citrus OR coconut OR mango OR mangosteen OR guava OR melon OR pear OR pineapple OR vegetable OR bean OR tomato OR onion OR cabbage OR cucumber OR gherkin OR eggplant OR aubergine OR carrot OR turnip OR pepper OR lettuce OR garlic OR brassica OR allium)
  3. (("yield change" ~3) OR "crop production" OR "crop growth" OR producti\* OR growth OR yield OR harvest OR biomass OR "dry weight" OR "fresh weight")

### CAB Abstracts

1. (climate N/1 (change\* OR variability OR disruption OR warming)) OR (global N/1 (warming OR temperature)) OR "greenhouse effect" OR "elevated CO2" OR ((increas\* OR elevat\* OR fertili?ation) N/2 (carbon-dioxide OR carbondioxide OR "carbon dioxide" OR CO2)) OR "carbon footprint" OR (ozone\* N/2 depletion) OR climate pollutant\* OR (soil N/2 (fertili?ation OR eutrophication)) OR ((soil OR water) N/4 (sodium OR salini?ation OR salin\*)) OR (temperature N/2 (increas\* OR variability OR trend\*)) OR extreme weather OR extreme temperature OR heatwave OR heat-wave OR (cold N/1 extreme) OR ("sea level" OR sea-level OR sealevel) N/4 rise) OR flood\* OR "storm surge" OR landslide\* OR wildfire\* OR wild-fire\* OR tropical cyclone\* OR windstorm\* OR (humidity N/2 (increase OR change OR elevat\* OR variability OR pattern)) OR "rainfall pattern" OR "acid rain" OR "drought stress" OR "water stress" OR "water scarcity" OR "extended drought" OR "cloud cover" OR (change N/1 ("land use" OR "land-use" OR "land cover")) OR soil erosion OR soil quality OR "nutrient run-off" OR ((quality OR availability) N/1 (groundwater OR ground-water OR "ground water" OR freshwater OR fresh-water OR "fresh water")) OR aquifer\* OR "water security" OR (water N/2 availab\*) OR (water N/2 quality) OR biodiverse\* OR biological divers\* OR pollinat\* OR ((bee\* OR insect) N/2 decline) OR "ecosystem change" OR "health of the planet" OR planet\* health OR environment\* change OR (chemical N/1 contamination) OR (pest\* N/4 (crop OR plant)) OR (plant N/1 (pathogen\* OR disease\*))
2. fruit\* OR watermelon\* OR banana\* OR apple\* OR grape\* OR orange\* OR tangerine\* OR mandarin\* OR satsuma\* OR clementine\* OR citrus OR coconut\* OR mango\*\* OR mangosteen\* OR guava\* OR melon\* OR pear\* OR pineapple\* OR vegetable\* OR bean\* OR tomato\*\* OR onion\* OR cabbage\* OR cucumber\* OR gherkin\* OR eggplant\* OR aubergine\* OR carrot\* OR turnip\* OR pepper\* OR lettuce OR garlic\* OR brassica\* OR allium
3. (yield N/3 change) OR "crop production" OR "crop growth" OR producti\$ OR growth OR yield\* OR harvest OR biomass OR "dry weight" OR "fresh weight"

### GreenFile

1. (climate W/1 (change\* OR variability OR disruption OR warming)) OR (global W/1 (warming OR temperature)) OR "greenhouse effect" OR "elevated CO2" OR ((increas\* OR elevat\* OR fertili?ation) W/2 (carbon-dioxide OR carbondioxide OR "carbon dioxide" OR CO2)) OR "carbon footprint" OR (ozone\* W/2 depletion) OR climate pollutant\* OR (soil W/2 (fertili?ation OR

eutrophication)) OR ((soil OR water) W/4 (sodium OR salinization OR salin\*)) OR (temperature W/2 (increas\* OR variability OR trend\*)) OR extreme weather OR extreme temperature OR heatwave OR heat-wave OR (cold W/1 extreme) OR (("sea level" OR sea-level OR sealevel) W/4 rise) OR flood\* OR "storm surge" OR landslide\* OR wildfire\* OR wild-fire\* OR tropical cyclone\* OR windstorm\* OR (humidity W/2 (increase OR change OR elevat\* OR variability OR pattern)) OR "rainfall pattern" OR "acid rain" OR "drought stress" OR "water stress" OR "water scarcity" OR "extended drought" OR "cloud cover" OR (change W/1 ("land use" OR "land-use" OR "land cover")) OR soil erosion OR soil quality OR "nutrient run-off" OR ((quality OR availability) W/1 (groundwater OR ground-water OR "ground water" OR freshwater OR fresh-water OR "fresh water")) OR aquifer\* OR "water security" OR (water W/2 availab\*) OR (water W/2 quality) OR biodiverse\$ OR biological divers\* OR pollinat\* OR ((bee\* OR insect) W/2 decline) OR "ecosystem change" OR "health of the planet" OR planet\* health OR environment\* change OR (chemical W/1 contamination) OR (pest\* W/4 (crop OR plant)) OR (plant W/1 (pathogen\* OR disease\*))

2. fruit\* OR watermelon\* OR banana\* OR apple\* OR grape\* OR orange\* OR tangerine\* OR mandarin\* OR satsuma\* OR clementine\* OR citrus OR coconut\* OR mango\*\* OR mangosteen\* OR guava\* OR melon\* OR pear\* OR pineapple\* OR vegetable\* OR bean\* OR tomato\*\* OR onion\* OR cabbage\* OR cucumber\* OR gherkin\* OR eggplant\* OR aubergine\* OR carrot\* OR turnip\* OR pepper\* OR lettuce OR garlic\* OR brassica\* OR allium
  
3. (yield W/3 change) OR "crop production" OR "crop growth" OR producti\$ OR growth OR yield\* OR harvest OR biomass OR "dry weight" OR "fresh weight"

## Web of Science

1. TS=("climate change" OR "climate warming" OR "global warming" OR "greenhouse effect" OR "climate variability" OR "elevated CO2" OR "elevated carbon-dioxide" OR "elevated carbon dioxide" OR "increased CO2" OR "increased carbon-dioxide" OR "increased carbon dioxide" OR "elevated temperature" OR "increased temperature" OR "increase in temperature" OR "CO2 fertilisation" OR "carbon dioxide fertilisation" OR "carbon-dioxide fertilisation" OR "CO2 fertilization" OR "carbon dioxide fertilization" OR "carbon-dioxide fertilization" OR "CO2 enrichment" OR "carbon dioxide enrichment" OR "carbon-dioxide enrichment" OR "ozone depletion" OR "depleted ozone" OR "water salinization" OR "soil salinization" OR "water stress" OR drought OR flood OR "drought stress" OR "increased rainfall" OR "increase in precipitation" OR "increased precipitation" OR "increase in rainfall" OR pollination OR "decreased pollination" OR "environmental change" OR "increased pest" OR "increased disease")
  
2. TS=(fruit OR watermelon OR banana OR apple OR grape OR orange OR tangerine OR mandarin OR satsuma OR clementine OR citrus OR coconut OR mango OR mangosteen OR guava OR melon OR pear OR pineapple OR vegetable OR bean OR tomato OR onion OR cabbage OR cucumber OR gherkin OR eggplant OR aubergine OR carrot OR turnip OR pepper OR lettuce OR garlic OR brassica OR allium)

3. TS=("change in yield" OR "yield change" OR "crop production" OR "crop growth" OR productivity OR production OR growth OR yield OR harvest OR biomass OR "dry weight" OR dry-weight OR "fresh weight" OR fresh-weight)

## Scopus

1. (climate W/1 (change OR variability OR disruption OR warming)) OR (global W/1 (warming OR temperature)) OR "greenhouse effect" OR "elevated CO2" OR ((increas\* OR elevat\* OR fertili?ation) W/2 (carbon-dioxide OR carbondioxide OR "carbon dioxide" OR CO2)) OR "carbon footprint" OR (ozone\* W/2 depletion) OR climate pollutant OR (soil W/2 (fertili?ation OR eutrophication)) OR ((soil OR water) W/4 (sodium OR salini?ation OR salin\*)) OR (temperature W/2 (increas\* OR variability OR trend)) OR extreme weather OR extreme temperature OR heatwave OR heat-wave OR (cold W/1 extreme) OR (("sea level" OR sea-level OR sealevel) W/4 rise) OR flood OR "storm surge" OR landslide OR wildfire OR wild-fire OR tropical cyclone OR windstorm OR (humidity W/2 (increase OR change OR elevat\* OR variability OR pattern)) OR "rainfall pattern" OR "acid rain" OR "drought stress" OR "water stress" OR "water scarcity" OR "extended drought" OR "cloud cover" OR (change W/1 ("land use" OR "land-use" OR "land cover")) OR soil erosion OR soil quality OR "nutrient run-off" OR ((quality OR availability) W/1 (groundwater OR ground-water OR "ground water" OR freshwater OR fresh-water OR "fresh water")) OR aquifer OR "water security" OR (water W/2 availab\*) OR (water W/2 quality) OR biodiverse\* OR biological divers\* OR pollinat\* OR ((bee OR insect) W/2 decline) OR "ecosystem change" OR "health of the planet" OR planet\* health OR environment\* change OR (chemical W/1 contamination) OR (pest W/4 (crop OR plant)) OR (plant W/1 (pathogen OR disease))
2. fruit\* OR watermelon\* OR banana\* OR apple\* OR grape\* OR orange\* OR tangerine\* OR mandarin\* OR satsuma\* OR clementine\* OR citrus OR coconut\* OR mango\* OR mangosteen\* OR guava\* OR melon\* OR pear\* OR pineapple\* OR vegetable\* OR bean\* OR tomato\* OR onion\* OR cabbage\* OR cucumber\* OR gherkin\* OR eggplant\* OR aubergine\* OR carrot\* OR turnip\* OR pepper\* OR lettuce OR garlic OR brassica\* OR allium
3. (yield W/3 change) OR "crop production" OR "crop growth" OR producti\* OR growth OR yield OR harvest OR biomass OR "dry weight" OR "fresh weight"

## Appendix 2 – Quality Assessment Criteria

*Modified checklist derived from the Critical Appraisal Skills Programme for randomised controlled trials*

| #  | Criterion description                   | Issues considered                                                                                                                                                                                                                                                                                                                                                                                                                                                                                   |
|----|-----------------------------------------|-----------------------------------------------------------------------------------------------------------------------------------------------------------------------------------------------------------------------------------------------------------------------------------------------------------------------------------------------------------------------------------------------------------------------------------------------------------------------------------------------------|
| 1. | Clear study description                 | <ul style="list-style-type: none"> <li>• Did the authors provide a clear description of the crops evaluated?</li> <li>• Did the authors provide a clear description of (combination of) environmental changes, including levels/concentrations evaluated?</li> <li>• Was a clear description given of crops, field / greenhouse conditions?</li> <li>• Did they give a clear justification of study in particular area – including a description of environmental conditions and trends?</li> </ul> |
| 2. | Appropriate comparison group/situation  | <ul style="list-style-type: none"> <li>• Were crops under the “intervention” compared to an appropriate and comparable baseline group/situation?</li> </ul>                                                                                                                                                                                                                                                                                                                                         |
| 3. | Clear methods description               | <ul style="list-style-type: none"> <li>• Were the methods of measuring exposure clearly described?</li> <li>• Were the methods of measuring outcome clearly described?</li> </ul>                                                                                                                                                                                                                                                                                                                   |
| 4. | Rigorous and clearly described analysis | <ul style="list-style-type: none"> <li>• Are sufficient data presented to support the findings?</li> <li>• Were analyses described in detail? (Could they be repeated by someone not involved in the study)</li> <li>• Did the researchers critically examine their potential biases during measurement, analysis and selection of data for presentation?</li> </ul>                                                                                                                                |

For inclusion in meta-analysis:

|    |                                |                                                                                                                                     |
|----|--------------------------------|-------------------------------------------------------------------------------------------------------------------------------------|
| 5. | Precision of measure of effect | <ul style="list-style-type: none"> <li>• What are the confidence limits?</li> <li>• Were they statistically significant?</li> </ul> |
|----|--------------------------------|-------------------------------------------------------------------------------------------------------------------------------------|

## Appendix 3 – IPCC forecasts, evaluated exposures and standardised changes

To define the standardised changes for this study, IPCC forecasts and evaluated exposure in included experiments we considered. The table below gives an overview of:

- Five environmental exposures included in this review (column A)
- IPCC AR5 forecasts (ensemble means) for mid-century (column B)
- IPCC AR5 forecasts (ensemble means) for end of century (column C)
- Evaluated ranges of exposures in included papers (column D1) & their median values (D2)
- Changes in environmental exposure level used for comparative analysis, standardisation and meta-analysis in this review (column E).

| <b>A</b>                                                             | <b>B</b>                                            | <b>C</b>                                | <b>D1</b>                                      | <b>D2</b>     | <b>E</b>                                       |
|----------------------------------------------------------------------|-----------------------------------------------------|-----------------------------------------|------------------------------------------------|---------------|------------------------------------------------|
| <b>Environmental Exposure</b>                                        | <b>IPCC forecast 2050 (RCP 4.5/8.5)<sup>1</sup></b> | <b>IPCC forecast 2100 (RCP 4.5/8.5)</b> | <b>Range evaluated in included experiments</b> | <b>Median</b> | <b>Standardised change used for this study</b> |
| Temperature(1)<br>(relative to 1986 – 2005)                          | +1.4/+2.0 °C                                        | +1.9/+3.8°C                             | +0.6°C / +16°C                                 |               | <b>+4°C</b>                                    |
| CO <sub>2</sub> (2, 3)<br>(relative to 2000)                         | +108 / +162 ppm                                     | +160 / +557 ppm                         | +87 / +860ppm                                  |               | <b>+250ppm</b>                                 |
| Tropospheric O <sub>3</sub> (4, 5)<br>(relative to 2000)             | -9.3%/+5.3% <sup>2</sup>                            | -2.6%/+22.0%                            | +10% / +2300% <sup>3</sup>                     | <b>84%</b>    | <b>+25%</b>                                    |
| Water availability(1)<br>(RCP 8.5 only –<br>relative to 1986 – 2005) | -30% (arid)/<br>+40% (arctic)                       | -50% (arid)/<br>+50% (arctic)           | -10% /-100%                                    |               | <b>-50%</b>                                    |
| Salinity                                                             | N.A. <sup>4</sup>                                   | N.A. <sup>3</sup>                       | +14% / +1665% <sup>5</sup>                     | <b>325%</b>   | <b>+25%</b>                                    |

<sup>1</sup> RCPs (Representative Concentration Pathways) are greenhouse gas concentration trajectories adopted by the IPCC: RCP4.5 assumes a global annual greenhouse gas emission increase (in CO<sub>2</sub> equivalents) leading to stabilisation of radiative forcing of +4.5 W/m<sup>2</sup> by 2100 (compared to 2000); RCP8.5 assumes an increase of +8.5 W/m<sup>2</sup> over the same period.

<sup>2</sup> Average annual O<sub>3</sub> concentration

<sup>3</sup> Median of evaluated O<sub>3</sub> ranges = +84% (N.B. many papers looked at yield improvement by testing different varieties rather than simulating environmental change conditions – see discussion)

<sup>4</sup> Various forecasts depending on multiple geographic characteristics and environmental changes

<sup>5</sup> Median of evaluated salinity ranges = +325% (N.B. many papers looked at salt resistant varieties rather than simulating environmental change conditions – see discussion)

## Appendix 4 – Overview of included papers in systematic review

| #  | Author & Year                | Title                                                                                                                                                         | Study design          | Location     | Climatic Zone | Crop Type     | Crop Group | Environmental exposure | Standardised Exposure | Yield/Nutritional Quality |              | Change (%) | Min.Max Change (%) | Q1 | Q2. | Q3 | Q4. | Q5. | Total quality score |
|----|------------------------------|---------------------------------------------------------------------------------------------------------------------------------------------------------------|-----------------------|--------------|---------------|---------------|------------|------------------------|-----------------------|---------------------------|--------------|------------|--------------------|----|-----|----|-----|-----|---------------------|
| 1  | Abd El-Mageed & Semida 2015  | Effect of deficit irrigation and growing seasons on plant water status, fruit yield and water use efficiency of squash under saline soil                      | Field Experiment      | Egypt        | Tropical      | Squash        | Cucurbits  | Water Availability     | -50%                  | Yield                     |              | -27.2537   | -47.05, -7.45      | 1  | 1   | 1  | 1   | 1   | 5                   |
| 2  | Adams et al 2001             | Effect of temperature on the growth and development of tomato fruits                                                                                          | Greenhouse Experiment | UK           | N.A.          | Tomato        | Solanum    | Temperature            | +4°C                  | Yield                     |              | -37.5217   | -45.75, -29.29     | 1  | 1   | 1  | 1   | 0   | 4                   |
| 3  | Agele et al 2014             | Growth and water-yield functions of dry-season fadama-grown pepper ( <i>Capsicum annuum</i> L.) under differential irrigation in a rainforest zone of Nigeria | Field Experiment      | Nigeria      | Tropical      | Pepper        | Solanum    | Water Availability     | -50%                  | Yield                     |              | -35.1756   | -46.88, -26.79     | 1  | 1   | 1  | 1   | 0   | 4                   |
| 4  | Ahmed et al 2014             | Deficit irrigation affects growth, yield, vitamin C content and irrigation water use efficiency of hot pepper grown in soilless culture                       | Greenhouse Experiment | China        | N.A.          | Hot pepper    | Solanum    | Water Availability     | -50%                  | Yield                     |              | -79.2363   | -89.78, -70.34     | 1  | 1   | 1  | 1   | 1   | 5                   |
| 5  | Akilli et al 2000            | Effect of CO2 enrichment on yield of some vegetables grown in greenhouses                                                                                     | Greenhouse Experiment | Turkey       | N.A.          | Pepper        | Solanum    | CO2                    | +250ppm               | Yield                     |              | 25.64103   |                    | 1  | 1   | 1  | 1   | 0   | 4                   |
| 6  | Akinbile et al 2011          | Growth, yield and water use pattern of chilli pepper under different irrigation scheduling and management                                                     | Field Experiment      | Nigeria      | Tropical      | Chilli Pepper | Solanum    | Water Availability     | -50%                  | Yield                     |              | 52.43056   | 24.48, 106.25      | 1  | 1   | 1  | 1   | 0   | 4                   |
| 7  | Al Sahli et al 2013          | Effect of Ozone and Ascorbic Acid on the Anatomical, Physiological and Biochemical Parameters of Pepper ( <i>Capsicum frutescens</i> L.)                      | Field Experiment      | Saudi Arabia | Tropical      | Pepper        | Solanum    | O3                     | +25%                  | Nutr. Quality             | Carotenoids  | 3.469792   | 1.02, 5.92         | 1  | 1   | 1  | 1   | 1   | 5                   |
|    |                              |                                                                                                                                                               |                       |              |               |               |            |                        |                       |                           | Antioxidants | 1.982761   | -0.47, 4.43        |    |     |    |     |     |                     |
| 8  | Aladenola & Madramootoo 2014 | Response of greenhouse-grown bell pepper ( <i>Capsicum annuum</i> L.) to variable irrigation                                                                  | Greenhouse Experiment | Canada       | N.A.          | Red Pepper    | Solanum    | Water Availability     | -50%                  | Yield                     |              | -64.8611   | -116.67, -12.50    | 1  | 1   | 1  | 1   | 0   | 4                   |
| 9  | Ammar et al 2014             | Physiological and yield responses of faba bean ( <i>Vicia faba</i> L.) to drought stress in managed and open field environments                               | Greenhouse Experiment | Saudi Arabia | N.A.          | Bean          | Legume     | Water Availability     | -50%                  | Yield                     |              | -43.6738   | -62.08, -17.04     | 1  | 1   | 1  | 1   | 0   | 4                   |
| 10 | Aragues et al 2010           | Five-year growth and yield response of two young olive cultivars ( <i>Olea europaea</i> L., cvs. Arbequina and Empeltre) to soil salinity                     | Field Experiment      | Spain        | Temperate     | Olive         | Drupe      | Salinity               | +25%                  | Yield                     |              | 0.297075   | -4.69, 12.73       | 1  | 1   | 1  | 1   | 0   | 4                   |



|    |                          |                                                                                                                                                                                                            |                       |          |              |                            |         |                    |                     |               |                                                                |                                                  |                                                                                  |   |   |   |   |   |   |
|----|--------------------------|------------------------------------------------------------------------------------------------------------------------------------------------------------------------------------------------------------|-----------------------|----------|--------------|----------------------------|---------|--------------------|---------------------|---------------|----------------------------------------------------------------|--------------------------------------------------|----------------------------------------------------------------------------------|---|---|---|---|---|---|
| 11 | Assefa et al 2014        | Improving adaptation to drought stress in small red common bean: phenotypic differences and predicted genotypic effects on grain yield, yield components and harvest index                                 | Field Experiment      | Ethiopia | Tropical     | Bean                       | Legume  | Water Availability | -50%                | Yield         |                                                                | -55.7                                            | -58.97, -51.20                                                                   | 1 | 1 | 1 | 1 | 0 | 4 |
| 12 | Azam et al 2013          | Yield, chemical composition and nutritional quality responses of carrot, radish and turnip to elevated atmospheric carbon dioxide                                                                          | Greenhouse Experiment | Pakistan | N.A.         | Carrot<br>Radish<br>Turnip | Root    | CO2                | +250ppm             | Yield         |                                                                | 28.82121<br>58.0631<br>30.23847                  |                                                                                  | 1 | 1 | 1 | 1 | 1 | 5 |
| 13 | Bandyopadhyay et al 2003 | Actual evapotranspiration and crop coefficients of onion ( <i>Allium cepa</i> L.) under varying soil moisture levels in the humid tropics of India                                                         | Field Experiment      | India    | Tropical     | Onion                      | Root    | Water Availability | -50%                | Yield         |                                                                | -47.2831                                         | -50.56, -44.01                                                                   | 1 | 1 | 1 | 1 | 0 | 4 |
| 14 | Barbagallo et al 2012    | Yield, physicochemical traits, antioxidant pattern, polyphenol oxidase activity and total visual quality of field-grown processing tomato cv. Brigade as affected by water stress in Mediterranean climate | Field Experiment      | Italy    | Sub-tropical | Tomato                     | Solanum | Water Availability | -50%                | Nutr. Quality | Vit. C<br>Carotenoids<br>Flavonoids<br>Phenols<br>Antioxidants | 9.72<br>-6.21934<br>0.29<br>-8.89203<br>-3.69111 | -6.26, -6.18                                                                     | 1 | 1 | 1 | 1 | 1 | 5 |
| 15 | Barnes et al 1992        | The influence of CO2 and O3, singly and in combination, on gas exchange, growth and nutrient status of radish ( <i>Raphanus sativus</i> L.)                                                                | Greenhouse Experiment | Germany  | N.A.         | Radish                     | Root    | CO2                | +250ppm             | Nutr. Quality | K<br>Mg<br>Ca                                                  | -5.09894<br>-14.8006<br>-12.2377                 | -5.29, -4.91<br>-14.99, -14.61<br>-13.84, -10.64                                 | 1 | 1 | 1 | 1 | 0 | 4 |
|    |                          |                                                                                                                                                                                                            |                       |          |              |                            |         | CO2 & O3           | +250ppmCO2 & +25%O3 |               | K<br>Mg<br>Ca                                                  | -<br>-<br>-                                      |                                                                                  |   |   |   |   |   |   |
| 16 | Baslam et al 2012        | Elevated CO2 may impair the beneficial effect of arbuscular mycorrhizal fungi on the mineral and phytochemical quality of lettuce                                                                          | Greenhouse Experiment | Spain    | N.A.         | Lettuce                    | Leafy   | CO2                | +250ppm             | Nutr. Quality | Ca<br>K<br>Mg<br>Zn<br>Fe                                      | 5.76<br>1.31<br>2.55<br>-1.06<br>243.67          | -24.98, 31.76<br>-9.44, 9.66<br>-25.37, 28.80<br>-37.06, 32.81<br>-32.58, 534.01 | 1 | 1 | 1 | 1 | 1 | 5 |

|    |                       |                                                                                                                                                            |                       |           |              |               |         |                    |         |               |             |          |                 |   |   |   |   |   |   |   |
|----|-----------------------|------------------------------------------------------------------------------------------------------------------------------------------------------------|-----------------------|-----------|--------------|---------------|---------|--------------------|---------|---------------|-------------|----------|-----------------|---|---|---|---|---|---|---|
|    |                       |                                                                                                                                                            |                       |           |              |               |         |                    |         |               | Mn          | 0.72     | -30.86, 32.47   |   |   |   |   |   |   |   |
|    |                       |                                                                                                                                                            |                       |           |              |               |         |                    |         |               | Carotenoids | -12.05   | -27.06, 0       |   |   |   |   |   |   |   |
|    |                       |                                                                                                                                                            |                       |           |              |               |         |                    |         |               | Flavonoids  | 25.34    | -5.41, 91.31    |   |   |   |   |   |   |   |
|    |                       |                                                                                                                                                            |                       |           |              |               |         |                    |         |               | Vit. C      | -4.94    | -9.44, 0        |   |   |   |   |   |   |   |
|    |                       |                                                                                                                                                            |                       |           |              |               |         |                    |         | Yield         |             | 13.26    | 8.41, 18.09     |   |   |   |   |   |   |   |
| 17 | Becker & Klaring 2015 | CO2 enrichment can produce high red leaf lettuce yield while increasing most flavonoid glycoside and some caffeic acid derivative concentrations           | Greenhouse Experiment | UK        | N.A.         | Lettuce       | Leafy   | CO2                | +250ppm | Yield         |             | 31.32    | 29.17, 33.48    | 1 | 1 | 1 | 1 | 0 | 4 |   |
| 18 | Ben Ahmed et al 2009  | Saline water irrigation effects on fruit development, quality, and phenolic composition of virgin olive oils, cv. Chemlali                                 | Field Experiment      | Tunisia   | Tropical     | Olive         | Drupe   | Salinity           | +25%    | Nutr. Quality | Carotenoids | 0.301349 | 0.23, 0.38      | 1 | 1 | 1 | 1 | 1 | 1 | 5 |
|    |                       |                                                                                                                                                            |                       |           |              |               |         |                    |         |               | Phenols     | 0.736787 | 0.62, 0.86      |   |   |   |   |   |   |   |
|    |                       |                                                                                                                                                            |                       |           |              |               |         |                    |         | Yield         |             | -1.85285 | -2.01, -1.70    |   |   |   |   |   |   |   |
| 19 | Bhattarai et al 2005  | Influence of soil moisture on yield and quality of tomato on a heavy clay soil                                                                             | Greenhouse Experiment | Australia | N.A.         | Tomato        | Solanum | Water Availability | -50%    | Nutr. Quality | Vit. C      | 37.55546 | 13.49, 61.62    | 1 | 1 | 1 | 1 | 0 | 4 |   |
|    |                       |                                                                                                                                                            |                       |           |              |               |         |                    |         | Yield         |             | 17.13307 | -69.57, 103.83  |   |   |   |   |   |   |   |
| 20 | Birhanu et al 2010    | Fruit yield and quality of drip-irrigated tomato under deficit irrigation                                                                                  | Field Experiment      | Ethiopia  | Tropical     | Tomato        | Solanum | Water Availability | -50%    | Yield         |             | -43.41   | -47.35, -39.47  | 1 | 1 | 1 | 1 | 0 | 4 |   |
| 21 | Borghesi et al 2011   | Effects of salinity stress on carotenoids, anthocyanins, and color of diverse tomato genotypes                                                             | Greenhouse Experiment | France    | N.A.         | Lettuce       | Leafy   | Salinity           | +25%    | Nutr. Quality | Carotenoids | 25.58    | -38.95, 89.11   | 1 | 1 | 1 | 1 | 0 | 4 |   |
|    |                       |                                                                                                                                                            |                       |           |              |               |         |                    |         | Yield         |             | -13.1947 | -24.45, -2.41   |   |   |   |   |   |   |   |
| 22 | Bortolin et al 2014   | Effects of chronic elevated ozone concentration on the redox state and fruit yield of red pepper plant Capsicum baccatum                                   | Field Experiment      | Brazil    | Sub-Tropical | Chilli Pepper | Solanum | O3                 | +25%    | Yield         |             | *        |                 | 1 | 1 | 1 | 1 | 1 | 5 |   |
| 23 | Bourgault et al 2010  | Effects of deficit irrigation and salinity stress on common bean (Phaseolus vulgaris L.) and mungbean (Vigna radiata L.) grown in a controlled environment | Greenhouse Experiment | Canada    | N.A.         | Common Bean   | Legume  | Water Availability | -50%    | Yield         |             | -91.19   | -102.17, -81.30 | 1 | 1 | 1 | 1 | 0 | 4 |   |
|    |                       |                                                                                                                                                            |                       |           |              | Mung Bean     |         |                    |         |               |             | -40.86   | -51.45, -25.45  |   |   |   |   |   |   |   |
| 24 | Bunce JA 2008         | Contrasting responses of seed yield to elevated carbon dioxide under field conditions within Phaseolus vulgaris                                            | Field Experiment      | US        | Temperate    | Bean          | Legume  | CO2                | +250ppm | Yield         |             | 20.38    | 17.11, 22.70    | 1 | 1 | 1 | 1 | 0 | 4 |   |
| 25 | Burkey et al 2005     | Assessment of ambient ozone effects on vegetation using snap bean as a bioindicator species                                                                | Field Experiment      | US        | Sub-Tropical | Snap Bean     | Legume  | O3                 | +25%    | Yield         |             | -4.15    | -13.49, 7.38    | 1 | 1 | 1 | 1 | 1 | 5 |   |

|         |                          |                                                                                                                               |                       |         |              |           |         |                    |         |               |              |               |                |   |   |   |   |   |   |
|---------|--------------------------|-------------------------------------------------------------------------------------------------------------------------------|-----------------------|---------|--------------|-----------|---------|--------------------|---------|---------------|--------------|---------------|----------------|---|---|---|---|---|---|
| 26      | Burkey et al 2012        | Field assessment of a snap bean ozone bioindicator system under elevated ozone and carbon dioxide in a free air system        | Field Experiment      | US      | Temperate    | Snap Bean | Legume  | O3                 | +25%    | Yield         |              |               |                | 1 | 1 | 1 | 1 | 1 | 5 |
|         |                          |                                                                                                                               |                       |         |              |           |         | CO2                | +250ppm |               | -25.41       | -43.58, -8.58 | 6.52           |   |   |   |   |   |   |
| 27      | Buttaro et al 2015       | Irrigation management of greenhouse tomato and cucumber using tensiometer: effects on yield, quality and water use            | Greenhouse Experiment | Italy   | N.A.         | Tomato    | Solanum | Water Availability | -50%    | Yield         |              |               |                | 1 | 1 | 1 | 1 | 0 | 4 |
| 28      | Cano-Lamadrid et al 2016 | Antioxidant capacity, fatty acids profile, and descriptive sensory analysis of table olives as affected by deficit irrigation | Field Experiment      | Spain   | Sub-Tropical | Olive     | Drupe   | Water Availability | -50%    | Nutr. Quality | Ca           | -24.4239      | -35.37, -13.48 | 1 | 1 | 1 | 1 | 0 | 4 |
|         |                          |                                                                                                                               |                       |         |              |           |         |                    |         |               | Mg           | -18.5966      | -24.25, -12.94 |   |   |   |   |   |   |
|         |                          |                                                                                                                               |                       |         |              |           |         |                    |         |               | K            | -10.6994      | -21.40, 0      |   |   |   |   |   |   |
|         |                          |                                                                                                                               |                       |         |              |           |         |                    |         |               | Fe           | -2.40642      | -4.81, 0       |   |   |   |   |   |   |
|         |                          |                                                                                                                               |                       |         |              |           |         |                    |         |               | Zn           | -20.3501      | -20.49, -20.21 |   |   |   |   |   |   |
|         |                          |                                                                                                                               |                       |         |              |           |         |                    |         |               | Cu           | -8.65542      | -14.27, -3.05  |   |   |   |   |   |   |
|         |                          |                                                                                                                               |                       |         |              |           |         |                    |         |               | Mn           | -9.48805      | -12.37, -6.60  |   |   |   |   |   |   |
|         |                          |                                                                                                                               |                       |         |              |           |         |                    |         |               | Flavonoids   | -0.90492      | -1.81, 0       |   |   |   |   |   |   |
|         |                          |                                                                                                                               |                       |         |              |           |         |                    |         |               | Antioxidants | -9.1605       | -29.17, -1.11  |   |   |   |   |   |   |
|         |                          |                                                                                                                               |                       |         |              |           |         |                    |         |               | Vit. C       | -7.18114      | -18.90, -1.24  |   |   |   |   |   |   |
| phenols | -0.23693                 | -0.23, -0.25                                                                                                                  |                       |         |              |           |         |                    |         |               |              |               |                |   |   |   |   |   |   |
| 29      | Caporn et al 1989        | The effects of oxides of nitrogen and carbon dioxide enrichment on photosynthesis and growth of lettuce (Lactuca sativa L.)   | Greenhouse Experiment | UK      | N.A.         | Lettuce   | Leafy   | CO2                | +250ppm | Yield         |              |               |                | 1 | 1 | 1 | 1 | 0 | 4 |
| 30      | Chagvardieff et al 1994  | Specific effects of irradiance and CO2 concentration doublings on productivity and mineral content in lettuce                 | Greenhouse Experiment | France  | N.A.         | Lettuce   | Leafy   | CO2                | +250ppm | Nutr. Quality | K            | -4.61         | 1              | 1 | 1 | 1 | 0 | 4 |   |
|         |                          |                                                                                                                               |                       |         |              |           |         |                    |         |               | Ca           | 0.53          |                |   |   |   |   |   |   |
|         |                          |                                                                                                                               |                       |         |              |           |         |                    |         |               | Mg           | 3.96          |                |   |   |   |   |   |   |
|         |                          |                                                                                                                               |                       |         |              |           |         |                    |         |               | Fe           | 69.97         |                |   |   |   |   |   |   |
| Yield   | 19.50984                 |                                                                                                                               |                       |         |              |           |         |                    |         |               |              |               |                |   |   |   |   |   |   |
| 31      | Chaudhary & Agrawal 2015 | The role of elevated ozone on growth, yield and seed quality amongst six cultivars of mung bean                               | Field Experiment      | India   | Tropical     | Mung Bean | Legume  | O3                 | +25%    | Yield         |              |               |                | 1 | 1 | 1 | 1 | 1 | 5 |
| 32      | Chavan et al 2010        | Changes in morphology and yield attributing characters of tomato genotypes due to moisture stress                             | Field Experiment      | India   | Tropical     | Tomato    | Solanum | Water Availability | -50%    | Yield         |              |               |                | 1 | 1 | 1 | 1 | 0 | 4 |
| 33      | Chen et al 1999          | Effects of NaCl salinity and CO2 enrichment on pepino (Solanum muricatum Ait.) l. Growth and yield                            | Greenhouse Experiment | Germany | N.A.         | Pepino    | Solanum | CO2                | +250ppm | Yield         |              |               |                | 1 | 1 | 1 | 1 | 1 | 5 |

|    |                            |                                                                                                                                          |                       |         |              |          |        |                          |                            |               |              |          |                |   |   |   |   |   |   |          |              |  |  |  |  |  |  |
|----|----------------------------|------------------------------------------------------------------------------------------------------------------------------------------|-----------------------|---------|--------------|----------|--------|--------------------------|----------------------------|---------------|--------------|----------|----------------|---|---|---|---|---|---|----------|--------------|--|--|--|--|--|--|
|    |                            |                                                                                                                                          |                       |         |              |          |        | CO2 & Salinity           | +250ppmCO2 & +25%Salinity  |               |              | -        |                |   |   |   |   |   |   |          |              |  |  |  |  |  |  |
| 34 | Choi et al 2011            | Growth and physiological responses of Chinese cabbage and radish to long-term exposure to elevated carbon dioxide and temperature        | Greenhouse Experiment | Korea   | N.A.         | Radish   | Root   | CO2                      | +250ppm                    | Yield         |              | -8.44    | -24.81, 11.90  | 1 | 1 | 1 | 1 | 0 | 4 |          |              |  |  |  |  |  |  |
|    |                            |                                                                                                                                          |                       |         |              | Cabbage  | Leafy  |                          |                            |               |              | 39.89    | -50.20, 168.44 |   |   |   |   |   |   |          |              |  |  |  |  |  |  |
|    |                            |                                                                                                                                          |                       |         |              | Radish   | Root   | Temperature              | +4°C                       |               |              | -46.9353 | -92.27, -20.41 |   |   |   |   |   |   |          |              |  |  |  |  |  |  |
|    |                            |                                                                                                                                          |                       |         |              | Cabbage  | Leafy  |                          |                            |               |              | -18.1318 | -36.14, -8.51  |   |   |   |   |   |   |          |              |  |  |  |  |  |  |
|    |                            |                                                                                                                                          |                       |         |              | Radish   | Root   | CO2 & Temp               | +250ppmCO2 & +4°C          |               |              | -        |                |   |   |   |   |   |   |          |              |  |  |  |  |  |  |
|    |                            |                                                                                                                                          |                       |         |              | Cabbage  | Leafy  |                          |                            |               |              | -        |                |   |   |   |   |   |   |          |              |  |  |  |  |  |  |
| 35 | Coelho et al 2005          | Effect of irrigation level on yield and bioactive amine content of American lettuce                                                      | Greenhouse Experiment | Brazil  | N.A.         | Lettuce  | Leafy  | Water Availability       | -50%                       | Yield         |              | -21.42   | -30.64, -11.07 | 1 | 1 | 1 | 1 | 0 | 4 |          |              |  |  |  |  |  |  |
| 36 | Cucci et al 2014           | Yield response of fennel ( <i>Foeniculum vulgare</i> Mill.) to irrigation with saline water                                              | Greenhouse Experiment | Italy   | N.A.         | Fennel   | Root   | Salinity                 | +25%                       | Yield         |              | -1.05467 | -1.10, -0.97   | 1 | 1 | 1 | 1 | 0 | 4 |          |              |  |  |  |  |  |  |
| 37 | Da Silva et al 2013        | Influences of two CO2 concentrations and water availability on bean crop                                                                 | Field Experiment      | Brazil  | Tropical     | Bean     | Legume | CO2                      | +250ppm                    | Yield         |              | 15.57316 |                | 1 | 1 | 1 | 1 | 0 | 4 |          |              |  |  |  |  |  |  |
|    |                            |                                                                                                                                          |                       |         |              |          |        | CO2 & Water Availability | +250ppmCO2 & -50%Water Av. |               |              | -        |                |   |   |   |   |   |   |          |              |  |  |  |  |  |  |
| 38 | Dadson et al 2005          | Effect of water stress on the yield of Cowpea ( <i>Vigna unguiculata</i> L. Walp.) genotypes in the Delmarva region of the United States | Field Experiment      | US      | Sub-Tropical | Cowpea   | Legume | Water Availability       | -50%                       | Yield         |              | -26.79   | -46.11, 1.22   | 1 | 1 | 1 | 1 | 0 | 4 |          |              |  |  |  |  |  |  |
| 39 | Daymond et al 1997         | The growth, development and yield of onion ( <i>Allium cepa</i> L.) in response to temperature and CO2                                   | Greenhouse Experiment | UK      | N.A.         | Onion    | Root   | CO2 & Temp               | +250ppmCO2 & +4°C          | Yield         |              | +        |                | 1 | 1 | 1 | 1 | 0 | 4 |          |              |  |  |  |  |  |  |
| 40 | De Bock et al 2009         | Impact of tropospheric ozone on food and feed quality of Brassica species                                                                | Field Experiment      | Belgium | Temperate    | Broccoli | Leafy  | O3                       | +25%                       | Nutr. Quality | Vit. C       | 10.27211 | -4.17, 38.47   | 1 | 1 | 1 | 1 | 0 | 4 |          |              |  |  |  |  |  |  |
|    |                            |                                                                                                                                          |                       |         |              |          |        |                          |                            |               | Antioxidants | -9.26061 | -23.43, 6.5    |   |   |   |   |   |   |          |              |  |  |  |  |  |  |
|    |                            |                                                                                                                                          |                       |         |              |          |        |                          |                            |               | Vit. E       | -19.9493 | -30.86, -9.04  |   |   |   |   |   |   |          |              |  |  |  |  |  |  |
| 41 | De Bock et al 2012         | Photosynthesis and crop growth of spring oilseed rape and Broccoli under elevated tropospheric ozone                                     | Field Experiment      | Belgium | Temperate    | Broccoli | Leafy  | O3                       | +25%                       | Yield         |              | -0.32402 |                | 1 | 1 | 1 | 1 | 1 | 5 |          |              |  |  |  |  |  |  |
| 42 | De Pascale & Barbieri 1995 | Effects of soil salinity from long-term irrigation with saline-sodic water on yield and quality of winter vegetable crops                | Field Experiment      | Italy   | Sub-Tropical | Lettuce  | Leafy  | Salinity                 | +25%                       | Yield         |              | 0.2097   | -1.00, -0.03   | 1 | 1 | 1 | 1 | 0 | 4 |          |              |  |  |  |  |  |  |
|    |                            |                                                                                                                                          |                       |         | Endive       |          |        |                          |                            |               |              |          |                |   |   |   |   |   |   | -0.31236 | -0.60, -0.20 |  |  |  |  |  |  |
|    |                            |                                                                                                                                          |                       |         | Fennel       | Root     |        |                          |                            |               |              |          |                |   |   |   |   |   |   | -0.30755 | -0.50, 0.04  |  |  |  |  |  |  |

|             |                       |                                                                                                                                      |                       |              |              |             |         |                    |      |               |              |          |               |   |   |   |   |   |   |
|-------------|-----------------------|--------------------------------------------------------------------------------------------------------------------------------------|-----------------------|--------------|--------------|-------------|---------|--------------------|------|---------------|--------------|----------|---------------|---|---|---|---|---|---|
| 43          | De Pascale et al 2001 | Irrigation with saline water improves carotenoids content and antioxidant activity of tomato                                         | Field Experiment      | Italy        | Sub-Tropical | Tomato      | Solanum | Salinity           | +25% | Nutr. Quality | K            | -0.36937 | -0.522, -0.18 | 1 | 1 | 1 | 1 | 0 | 4 |
|             |                       |                                                                                                                                      |                       |              |              |             |         |                    |      |               | Ca           | -0.02521 | -0.77, 1.25   |   |   |   |   |   |   |
|             |                       |                                                                                                                                      |                       |              |              |             |         |                    |      |               | Mg           | -0.55089 | -1.07, -0.22  |   |   |   |   |   |   |
|             |                       |                                                                                                                                      |                       |              |              |             |         |                    |      |               | Fe           | -0.52195 | -1.16, -0.14  |   |   |   |   |   |   |
|             |                       |                                                                                                                                      |                       |              |              |             |         |                    |      |               | Mn           | -0.6914  | -1.44, -0.25  |   |   |   |   |   |   |
|             |                       |                                                                                                                                      |                       |              |              |             |         |                    |      |               | Cu           | -0.52634 | -1.20, -0.21  |   |   |   |   |   |   |
|             |                       |                                                                                                                                      |                       |              |              |             |         |                    |      |               | Zn           | -0.43572 | -1.00, -0.17  |   |   |   |   |   |   |
|             |                       |                                                                                                                                      |                       |              |              |             |         |                    |      |               | Carotenoids  | 1.284227 | 0.10, 2.44    |   |   |   |   |   |   |
| 44          | De Pascale et al 2003 | Physiological responses of pepper to salinity and drought                                                                            | Greenhouse Experiment | Italy        | N.A.         | Pepper      | Solanum | Salinity           | +25% | Yield         |              | -0.33194 | -0.77, -0.59  | 1 | 1 | 1 | 1 | 0 | 4 |
| 45          | De Pascale et al 2005 | Soil salinization affects growth, yield and mineral composition of cauliflower and broccoli                                          | Field Experiment      | Italy        | Sub-Tropical | Cauliflower | Leafy   | Salinity           | +25% | Nutr. Quality | K            | -2.56671 | -3.57, -1.57  | 1 | 1 | 1 | 1 | 0 | 4 |
|             |                       |                                                                                                                                      |                       |              |              |             |         |                    |      |               | Ca           | 1.764707 | 0.86, 2.67    |   |   |   |   |   |   |
|             |                       |                                                                                                                                      |                       |              |              |             |         |                    |      |               | Mg           | 1.040986 | 0.13, 1.96    |   |   |   |   |   |   |
|             |                       |                                                                                                                                      |                       |              |              |             |         |                    |      |               | Fe           | 6.560721 | 3.72, 9.41    |   |   |   |   |   |   |
|             |                       |                                                                                                                                      |                       |              |              |             |         |                    |      |               | Mn           | 5.957681 | 0.84, 11.07   |   |   |   |   |   |   |
|             |                       |                                                                                                                                      |                       |              |              |             |         |                    |      |               | Cu           | 1.114552 | 0.54, 1.69    |   |   |   |   |   |   |
|             |                       |                                                                                                                                      |                       |              |              |             |         |                    |      |               | Zn           | -0.01284 | -0.63, 0.60   |   |   |   |   |   |   |
|             |                       |                                                                                                                                      |                       |              |              | Broccoli    |         |                    |      |               | K            | -1.39738 | -2.58, -1.49  |   |   |   |   |   |   |
|             |                       |                                                                                                                                      |                       |              |              |             |         |                    |      |               | Ca           | -6.69386 | -10.46, -3.08 |   |   |   |   |   |   |
|             |                       |                                                                                                                                      |                       |              |              |             |         |                    |      |               | Mg           | -5.96095 | -12.70, -1.48 |   |   |   |   |   |   |
|             |                       |                                                                                                                                      |                       |              |              |             |         |                    |      |               | Fe           | -2.32688 | -17.93, 11.07 |   |   |   |   |   |   |
|             |                       |                                                                                                                                      |                       |              |              |             |         |                    |      |               | Mn           | 9.023392 | 4.53, 16.67   |   |   |   |   |   |   |
|             |                       |                                                                                                                                      |                       |              |              |             |         |                    |      |               | Cu           | -2.844   | -17.78, 3.63  |   |   |   |   |   |   |
|             |                       |                                                                                                                                      |                       |              |              |             |         |                    |      |               | Zn           | -8.6951  | -22.22, -1.13 |   |   |   |   |   |   |
| Cauliflower | Yield                 |                                                                                                                                      | -0.54104              | -0.74, -0.38 |              |             |         |                    |      |               |              |          |               |   |   |   |   |   |   |
| Broccoli    |                       |                                                                                                                                      | -0.89992              | -1.27, -0.57 |              |             |         |                    |      |               |              |          |               |   |   |   |   |   |   |
| 46          | De Pascale et al 2007 | Comparative analysis of water and salt stress-induced modifications of quality parameters in cherry tomatoes                         | Greenhouse Experiment | Italy        | N.A.         | Tomato      | Solanum | Salinity           | +25% | Yield         |              | -11.61   |               | 1 | 1 | 1 | 1 | 0 | 4 |
| 47          | De Pascale et al 2000 | Effects of irrigating pepper (Capsicum annum L.) plants with saline water on plant growth, water use efficiency and marketable yield | Field Experiment      | Italy        | Sub-tropical | Pepper      | Solanum | Water Availability | -50% | Yield         |              | -18.25   | -37.37, 0     | 1 | 1 | 1 | 1 | 0 | 4 |
| 48          | De Pascale et al 2012 | Seasonal and multiannual effects of salinisation on tomato yield and fruit quality                                                   | Field Experiment      | Italy        | Sub-Tropical | Tomato      | Solanum | Salinity           | +25% | Nutr. Quality | Antioxidants | 1.065097 | 0.48, 1.61    | 1 | 1 | 1 | 1 | 0 | 4 |
|             |                       |                                                                                                                                      |                       |              |              |             |         |                    |      |               | Carotenoids  | 0.557322 | 0.40, 0.71    |   |   |   |   |   |   |
|             |                       |                                                                                                                                      |                       |              |              |             |         |                    |      |               | K            | -0.5369  | -0.56, -0.52  |   |   |   |   |   |   |
|             |                       |                                                                                                                                      |                       |              |              |             |         |                    |      |               | Ca           | -0.32989 | -0.35, -0.31  |   |   |   |   |   |   |
|             |                       |                                                                                                                                      |                       |              |              |             |         |                    |      |               | Yield        |          | -0.79183      |   |   |   |   |   |   |

|    |                              |                                                                                                                                                                            |                       |         |              |                    |         |                    |                   |               |        |                |                |   |   |   |   |   |   |
|----|------------------------------|----------------------------------------------------------------------------------------------------------------------------------------------------------------------------|-----------------------|---------|--------------|--------------------|---------|--------------------|-------------------|---------------|--------|----------------|----------------|---|---|---|---|---|---|
| 49 | Delfine et al 2000           | Effects of water stress on the yield and photosynthesis of field-grown sweet pepper ( <i>Capsicum annuum</i> L.)                                                           | Field Experiment      | Italy   | Sub-Tropical | Pepper             | Solanum | Water Availability | -50%              | Yield         |        | 15.60531       | -8.79, 40      | 1 | 1 | 1 | 1 | 0 | 4 |
| 50 | Di Mola et al 2013           | Interaction between salinity and crop cycle: effect on yield and quality of lettuce                                                                                        | Field Experiment      | Italy   | Sub-Tropical | Lettuce            | Leafy   | Salinity           | +25%              | Nutr. Quality | Vit. C | -0.71056       | -0.97, -0.45   | 1 | 1 | 1 | 1 | 0 | 4 |
| 51 | El-Aal et al 2011            | Effect of sowing dates, irrigation levels and climate change on yield of common bean ( <i>Phaseolus vulgaris</i> L.)                                                       | Greenhouse Experiment | Egypt   | N.A.         | Dry Bean           | Legume  | Water Availability | -50%              | Yield         |        | -28.68         | -34.77, -23.60 | 1 | 1 | 1 | 1 | 0 | 4 |
| 52 | El-Tohamy et al 1999         | Effect of long term drought stress on growth and yield of bean plants ( <i>Phaseolus vulgaris</i> L.)                                                                      | Greenhouse Experiment | Germany | N.A.         | Bean               | Legume  | Water Availability | -50%              | Yield         |        | -38.866        | -55.92, -13.16 | 1 | 1 | 1 | 1 | 0 | 4 |
| 53 | Emam et al 2010              | Water stress effects on two common bean cultivars with contrasting growth habits                                                                                           | Greenhouse Experiment | Iran    | N.A.         | Bean               | Legume  | Water Availability | -50%              | Yield         |        | -64.67         | -96.19, 2.96   | 1 | 1 | 1 | 1 | 0 | 4 |
| 54 | Flowers et al 2007           | Photosynthesis, chlorophyll fluorescence, and yield of snap bean ( <i>Phaseolus vulgaris</i> L.) genotypes differing in sensitivity to ozone                               | Field Experiment      | US      | Sub-Tropical | Snap Bean          | Legume  | O3                 | +25%              | Yield         |        | *              |                | 1 | 1 | 1 | 1 | 0 | 4 |
| 55 | Francois 1994                | Yield and quality response of salt-stressed garlic                                                                                                                         | Field Experiment      | US      | Temperate    | Garlic             | Root    | Salinity           | +25%              | Nutr. Quality | Ca     | -0.97168       | -7.56, 4.92    | 1 | 1 | 1 | 1 | 0 | 4 |
|    |                              |                                                                                                                                                                            |                       |         |              |                    |         |                    |                   | Yield         |        | -6.20228       | -12.64, 3.11   |   |   |   |   |   |   |
| 56 | Fu et al 2015                | Unexpected decrease in yield and antioxidants in vegetable at very high CO2 levels                                                                                         | Greenhouse Experiment | China   | N.A.         | Cabbage<br>Lettuce | Leafy   | CO2                | +250ppm           | Yield         |        | 9.166667<br>15 |                | 1 | 1 | 1 | 1 | 0 | 4 |
| 57 | Gao et al 2015               | Leaf photosynthesis and yield components of mung bean under fully open-air elevated [CO2]                                                                                  | Field Experiment      | China   | Temperate    | Mung Bean          | Legume  | CO2                | +250ppm           | Yield         |        | 23.01737       |                | 1 | 1 | 1 | 1 | 0 | 4 |
| 58 | Garruna-Hernández et al 2012 | Changes in flowering and fruiting of Habanero pepper in response to higher temperature and CO2                                                                             | Greenhouse Experiment | Mexico  | N.A.         | Habanero Pepper    | Solanum | CO2                | +250ppm           | Yield         |        | 32.36          | 29.11, 35.59   | 1 | 1 | 1 | 1 | 0 | 4 |
|    |                              |                                                                                                                                                                            |                       |         |              |                    |         | Temperature        | +4°C              |               |        | -36.3889       | -41.11, -31.67 |   |   |   |   |   |   |
| 59 | Gatta et al 2015             | Treated agro-industrial wastewater irrigation of tomato crop: Effects on qualitative/quantitative characteristics of production and microbiological properties of the soil | Field Experiment      | Italy   | Sub-Tropical | Tomato             | Solanum | Water Quality      | Waste vs. Potable | Nutr. Quality | Ca     | 8.11           |                | 1 | 1 | 1 | 1 | 1 | 5 |
|    |                              |                                                                                                                                                                            |                       |         |              |                    |         |                    |                   | Mg            | -2.48  |                |                |   |   |   |   |   |   |
|    |                              |                                                                                                                                                                            |                       |         |              |                    |         |                    |                   | K             | 0.04   |                |                |   |   |   |   |   |   |
|    |                              |                                                                                                                                                                            |                       |         |              |                    |         |                    |                   | Yield         |        | -12.2          | -13.2, -12.79  |   |   |   |   |   |   |

|    |                               |                                                                                                                                                                                                                 |                       |             |              |                |         |                    |                   |               |         |          |                |   |   |   |   |   |   |
|----|-------------------------------|-----------------------------------------------------------------------------------------------------------------------------------------------------------------------------------------------------------------|-----------------------|-------------|--------------|----------------|---------|--------------------|-------------------|---------------|---------|----------|----------------|---|---|---|---|---|---|
| 60 | Gatta et al 2015b             | Effects of treated agro-industrial wastewater irrigation on tomato processing quality                                                                                                                           | Field Experiment      | Italy       | Sub-Tropical | Tomato         | Solanum | Water Quality      | Waste vs. Potable | Nutr. Quality | Ca      | -22.74   |                | 1 | 1 | 1 | 1 | 1 | 5 |
|    |                               |                                                                                                                                                                                                                 |                       |             |              |                |         |                    |                   | Yield         |         | -7.6     |                |   |   |   |   |   |   |
| 61 | Gencoglan et al 2006          | Response of red hot pepper plant ( <i>Capsicum annuum</i> L.) to the deficit irrigation                                                                                                                         | Field Experiment      | Turkey      | Sub-Tropical | Hot pepper     | Solanum | Water Availability | -50%              | Yield         |         | -58.5538 | -58.60, -58.55 | 1 | 1 | 1 | 1 | 0 | 4 |
| 62 | González-Fernández et al 2016 | Ozone effects on the physiology and marketable biomass of leafy vegetables under Mediterranean conditions: Spinach ( <i>Spinacia oleracea</i> L.) and Swiss chard ( <i>Beta vulgaris</i> L. var. <i>cycla</i> ) | Field Experiment      | Spain       | Sub-Tropical | Spinach        | Leafy   | O3                 | +25%              | Yield         |         | -25.81   | -115.66, 5.15  | 1 | 1 | 1 | 1 | 0 | 4 |
|    |                               |                                                                                                                                                                                                                 |                       |             |              | Swiss Chard    |         |                    |                   |               |         | -16.76   | -80.44, 5.08   |   |   |   |   |   |   |
| 63 | Grashoff et al 1995           | Effects of climate change on productivity of cereals and legumes; model evaluation of observed year-to-year variability                                                                                         | Greenhouse Experiment | Netherlands | N.A.         | Faba bean      | Legume  | CO2                | +250ppm           | Yield         |         | 32.36607 |                | 1 | 1 | 1 | 1 | 0 | 4 |
| 64 | Gutezeit B 2004               | Yield and nitrogen balance of Broccoli at different soil moisture levels                                                                                                                                        | Greenhouse Experiment | Germany     | N.A.         | Broccoli       | Leafy   | Water Availability | -50%              | Yield         |         | -4.59    | -22.12, 26.35  | 1 | 1 | 1 | 1 | 0 | 4 |
| 65 | Hamilton et al 2010           | Effect of Saline Irrigation Water on Antioxidants in Three Hydroponically Grown Leafy Vegetables: <i>Diplotaxis tenuifolia</i> , <i>Eruca sativa</i> , and <i>Lepidium sativum</i>                              | Greenhouse Experiment | US          | N.A.         | Rocket         | Leafy   | Salinity           | +25%              | Nutr. Quality | Phenols | -0.2158  | -2.72, 1.66    | 1 | 1 | 1 | 1 | 1 | 5 |
|    |                               |                                                                                                                                                                                                                 |                       |             |              | Cress          |         |                    |                   |               | Vit. C  | -0.01653 | -3.39, 5.78    |   |   |   |   |   |   |
|    |                               |                                                                                                                                                                                                                 |                       |             |              |                |         |                    |                   |               | Phenols | 0.664123 | -1.84, 2.22    |   |   |   |   |   |   |
|    |                               |                                                                                                                                                                                                                 |                       |             |              |                |         |                    |                   |               | Vit. C  | -2.22851 | -4.40, -0.59   |   |   |   |   |   |   |
| 66 | Hassan et al 1995             | Effect of ozone on radish and turnip under Egyptian field conditions                                                                                                                                            | Field Experiment      | Egypt       | Tropical     | Radish, Turnip | Root    | O3                 | +25%              | Yield         |         | *        |                | 1 | 1 | 1 | 1 | 0 | 4 |
| 67 | Hassan et al 1999             | Effects of ozone and drought stress on growth, yield and physiology of tomatoes ( <i>Lycopersicon esculentum</i> Mill cv. Baladey)                                                                              | Greenhouse Experiment | Egypt       | N.A.         | Tomato         | Solanum | O3                 | +25%              | Yield         |         | -4.8     | -4.98, -4.62   | 1 | 1 | 1 | 1 | 0 | 4 |
| 68 | He et al 2010                 | Effects of elevated root zone CO2 and air temperature on photosynthetic gas exchange, nitrate uptake, and total reduced nitrogen content in aeroponically grown lettuce plants                                  | Greenhouse Experiment | New Zealand | N.A.         | Lettuce        | Leafy   | Temperature        | +4°C              | Yield         |         | -29.03   |                | 1 | 1 | 1 | 1 | 0 | 4 |
| 69 | Heagle et al 2002             | Growth and yield responses of snap bean to mixtures of carbon dioxide and ozone                                                                                                                                 | Field Experiment      | US          | Sub-Tropical | Snap bean      | Legume  | O3                 | +25%              | Yield         |         | -5.79    | -9.04, -2.54   | 1 | 1 | 1 | 1 | 0 | 4 |

|    |                       |                                                                                                                                                      |                       |           |              |               |         |                    |                   |               |              |          |                |   |   |   |   |   |   |
|----|-----------------------|------------------------------------------------------------------------------------------------------------------------------------------------------|-----------------------|-----------|--------------|---------------|---------|--------------------|-------------------|---------------|--------------|----------|----------------|---|---|---|---|---|---|
| 70 | Helyes 2015           | The simultaneous effect of heat stress and water supply on total polyphenol content of eggplant                                                      | Field Experiment      | Hungary   | Temperate    | Eggplant      | Solanum | Water Availability | -50%              | Yield         |              | -16.0506 | -25.36, -6.75  | 1 | 1 | 1 | 1 | 0 | 4 |
| 71 | Huang et al 2016      | Growth, yield and fruit quality of cherry tomato irrigated with saline water at different developmental stages                                       | Field Experiment      | China     | Temperate    | Cherry Tomato | Solanum | Salinity           | +25%              | Yield         |              | -0.64    |                | 1 | 1 | 1 | 1 | 0 | 4 |
| 72 | Hussein et al 2011    | Effect of irrigation (water stress) on vegetative growth and yield in two genotypes of okra                                                          | Field Experiment      | Egypt     | Tropical     | Okra          | Mallow  | Water Availability | -50%              | Yield         |              | -35.49   | -50.48, 21.11  | 1 | 1 | 1 | 1 | 0 | 4 |
| 73 | Incerti et al 2007    | Effect of sea water on biochemical properties of fruit of tomato ( <i>Lycopersicon esculentum</i> Mill.) genotypes differing for ethylene production | Greenhouse Experiment | Italy     | N.A.         | Tomato        | Solanum | Salinity           | +25%              | Yield         |              | -5.80772 | -5.95, -5.55   | 1 | 1 | 1 | 1 | 1 | 5 |
| 74 | Ismail, SM 2010       | Influence of deficit irrigation on water use efficiency and bird pepper production ( <i>Capsicum annum</i> L.)                                       | Greenhouse Experiment | Japan     | N.A.         | Bird Pepper   | Solanum | Water Availability | -50%              | Yield         |              | -81.1897 | -96.46, -65.92 | 1 | 1 | 1 | 1 | 0 | 4 |
| 75 | Jain et al 2007       | Photosynthesis and nutrient composition of spinach and fenugreek grown under elevated carbon dioxide                                                 | Field Experiment      | India     | Tropical     | Spinach       | Leafy   | CO2                | +250ppm           | Nutr. Quality | Fe           | -55.38   |                | 1 | 1 | 1 | 1 | 1 | 5 |
| 76 | Jifon & Wolfe 2005    | High temperature-induced sink limitation alters growth & photosynthetic acclimation to elevated CO2 in Bean ( <i>Phaseolus vulgaris</i> L.)          | Greenhouse Experiment | New York  | N.A.         | Kidney Bean   | Legume  | CO2                | +250ppm           | Yield         |              | 43.425   |                | 1 | 1 | 1 | 1 | 0 | 4 |
|    |                       |                                                                                                                                                      |                       |           |              |               |         | Temperature        | +4°C              |               |              | -32.85   |                |   |   |   |   |   |   |
|    |                       |                                                                                                                                                      |                       |           |              |               |         | CO2 & Temp         | +250ppmCO2 & +4°C |               |              | -        |                |   |   |   |   |   |   |
| 77 | Jin et al 2009        | Atmospheric nitric oxide stimulates plant growth and improves the quality of spinach ( <i>Spinacia oleracea</i> )                                    | Greenhouse Experiment | China     | N.A.         | Spinach       | Leafy   | CO2                | +250ppm           | Nutr. Quality | Flavonoids   | 1.91     | 1              | 1 | 1 | 1 | 1 | 1 | 5 |
|    |                       |                                                                                                                                                      |                       |           |              |               |         |                    |                   |               | Vit. C       | 11.68    |                |   |   |   |   |   |   |
|    |                       |                                                                                                                                                      |                       |           |              |               |         |                    |                   |               | Antioxidants | 8.65     |                |   |   |   |   |   |   |
|    |                       |                                                                                                                                                      |                       |           |              |               |         |                    |                   |               | Yield        | 31.74603 |                |   |   |   |   |   |   |
| 78 | Jolliffe & Ehret 1985 | Growth of bean plants at elevated CO2 concentrations                                                                                                 | Greenhouse Experiment | Canada    | N.A.         | Bush bean     | Legume  | CO2                | +250ppm           | Yield         |              | 27.17    | 21.14, 36.89   | 1 | 1 | 1 | 1 | 0 | 4 |
| 79 | Juknys et al 2011     | Response of different agricultural plants to elevated CO2 and air temperature                                                                        | Greenhouse Experiment | Lithuania | N.A.         | Pea           | Legume  | CO2                | +250ppm           | Nutr. Quality | Carotenoids  | 4.76     | 1              | 1 | 1 | 1 | 1 | 5 |   |
|    |                       |                                                                                                                                                      |                       |           |              | Tomato        | Solanum |                    |                   |               |              | 11.16    |                |   |   |   |   |   |   |
|    |                       |                                                                                                                                                      |                       |           |              | Radish        | Root    |                    |                   |               |              | -2.98    |                |   |   |   |   |   |   |
| 80 | Karam et al 2002      | Yield and nitrogen recovery of lettuce under different irrigation regimes                                                                            | Field Experiment      | Lebanon   | Sub-Tropical | Lettuce       | Leafy   | Water Availability | -50%              | Yield         |              | -43.75   | -96.46, -65.92 | 1 | 1 | 1 | 1 | 0 | 4 |



|    |                    |                                                                                                                                                                                            |                       |             |              |             |         |                    |         |               |       |              |                |                |   |   |   |   |   |             |
|----|--------------------|--------------------------------------------------------------------------------------------------------------------------------------------------------------------------------------------|-----------------------|-------------|--------------|-------------|---------|--------------------|---------|---------------|-------|--------------|----------------|----------------|---|---|---|---|---|-------------|
| 81 | Kardoni et al 2013 | Effect of salinity stress and silicon application on yield and component yield of faba bean ( <i>Vicia faba</i> )                                                                          | Greenhouse Experiment | Iran        | N.A.         | Faba bean   | Legume  | Salinity           | +25%    | Yield         |       | -3.72314     | -4.69, -3.21   | 1              | 1 | 1 | 1 | 0 | 4 |             |
| 82 | Katerji et al 1992 | Effect of salinity on water stress, growth and yield of broadbeans                                                                                                                         | Greenhouse Experiment | Italy       | N.A.         | Broad Bean  | Legume  | Salinity           | +25%    | Yield         |       | -9.84703     | -13.62, -6.08  | 1              | 1 | 1 | 1 | 0 | 4 |             |
| 83 | Katerji et al 1998 | Response of tomatoes, a crop of indeterminate growth, to soil salinity                                                                                                                     | Greenhouse Experiment | Italy       | N.A.         | Tomato      | Solanum | Salinity           | +25%    | Yield         |       | -1.96032     | -2.62, -1.49   | 1              | 1 | 1 | 1 | 0 | 4 |             |
| 84 | Katerji et al 2000 | Salt tolerance classification of crops according to soil salinity and to water stress day index                                                                                            | Greenhouse Experiment | Italy       | N.A.         | Broad Bean  | Legume  | Salinity           | +25%    | Yield         |       | -1.09692     | -2.07, -0.93   | 1              | 1 | 1 | 1 | 0 | 4 |             |
| 85 | Katerji et al 2005 | Salt tolerance analysis of chickpea, faba bean and durum wheat varieties: I. Chickpea and faba bean                                                                                        | Greenhouse Experiment | Italy       | N.A.         | Chickpea    | Legume  | Salinity           | +25%    | Yield         |       | -3.75833     | -5.36, -0.25   | 1              | 1 | 1 | 1 | 0 | 4 |             |
|    |                    |                                                                                                                                                                                            |                       |             |              | Faba Bean   |         |                    |         |               |       | -1.82321     | -2.66, -0.89   |                |   |   |   |   |   |             |
| 86 | Katerji et al 2011 | Faba bean productivity in saline-drought conditions                                                                                                                                        | Field Experiment      | Italy       | Sub-Tropical | Faba Bean   | Legume  | Water Availability | -50%    | Yield         |       | -43.5004     | -52.52, -37.50 | 1              | 1 | 1 | 1 | 0 | 4 |             |
|    |                    |                                                                                                                                                                                            |                       |             |              |             |         | Salinity           | +25%    |               |       | -1.94616     | -3.04, -1.33   |                |   |   |   |   |   |             |
| 87 | Khan et al 2013    | The impact of enhanced atmospheric carbon dioxide on yield, proximate composition, elemental concentration, fatty acid and vitamin C contents of tomato ( <i>Lycopersicon esculentum</i> ) | Greenhouse Experiment | Pakistan    | N.A.         | Tomato      | Solanum | CO2                | +250ppm | Nutr. Quality |       | Vit. C       | -9.3068        | -10.30, -8.31  | 1 | 1 | 1 | 1 | 1 | 5           |
|    |                    |                                                                                                                                                                                            |                       |             |              |             |         |                    |         |               |       | Protein      | -6.65609       | -7.62, -5.69   |   |   |   |   |   |             |
|    |                    |                                                                                                                                                                                            |                       |             |              |             |         |                    |         |               |       | Zn           | -8.82992       | -11.82, -5.84  |   |   |   |   |   |             |
|    |                    |                                                                                                                                                                                            |                       |             |              |             |         |                    |         |               |       | Fe           | 3.373989       | 1.26, 5.48     |   |   |   |   |   |             |
|    |                    |                                                                                                                                                                                            |                       |             |              |             |         |                    | Yield   |               | 32.89 | 30.95, 34.83 |                |                |   |   |   |   |   |             |
| 88 | Kim et al 2016     | Effects of irrigation with saline water on crop growth and yield in greenhouse cultivation                                                                                                 | Greenhouse Experiment | South Korea | N.A.         | Cabbage     | Leafy   | Salinity           | +25%    | Yield         |       | -0.67531     | -1.27, 0.08    | 1              | 1 | 1 | 1 | 0 | 4 |             |
|    |                    |                                                                                                                                                                                            |                       |             |              | Lettuce     |         |                    |         |               |       |              | 0.113685       |                |   |   |   |   |   | -0.70, 0.79 |
| 89 | Kirnak et al 2001  | The influence of water deficit on vegetative growth, physiology, fruit yield and quality in eggplants                                                                                      | Field Experiment      | Turkey      | Sub-Tropical | Eggplant    | Solanum | Water Availability | -50%    | Yield         |       | -59.28       | -62.50, -55.06 | 1              | 1 | 1 | 1 | 0 | 4 |             |
| 90 | Kirnak et al 2014  | Paprika Pepper Yield and Quality as Affected by Different Irrigation Levels                                                                                                                | Field Experiment      | Turkey      | Tropical     | Pepper      | Solanum | Water Availability | -50%    | Nutr. Quality |       | Vit. C       | -20.5343       | -23.72, -17.35 | 1 | 1 | 1 | 1 | 0 | 4           |
|    |                    |                                                                                                                                                                                            |                       |             |              |             |         |                    |         |               |       | Carotenoids  | -14.3097       | -24.58, -4.04  |   |   |   |   |   |             |
| 91 | Kohut et al 1983   | Yield response of red kidney bean <i>Phaseolus vulgaris</i> to incremental ozone concentrations in the field                                                                               | Field Experiment      | US          | Temperate    | Kidney Bean | Legume  | O3                 | +25%    | Yield         |       | -2.88        | -4.03, -1.52   | 1              | 1 | 1 | 1 | 0 | 4 |             |

|              |                         |                                                                                                                                                                    |                       |              |              |              |         |                    |                           |               |               |              |                |                |   |   |   |   |   |   |
|--------------|-------------------------|--------------------------------------------------------------------------------------------------------------------------------------------------------------------|-----------------------|--------------|--------------|--------------|---------|--------------------|---------------------------|---------------|---------------|--------------|----------------|----------------|---|---|---|---|---|---|
| 92           | Krauss et al 2006       | The influence of different electrical conductivity values in a simplified recirculating soilless system on inner and outer fruit quality characteristics of tomato | Greenhouse Experiment | Germany      | N.A.         | Tomato       | Solanum | Salinity           | +25%                      | Yield         | Nutr. Quality | Vit. C       | -3.04477       | -4.34, -2.12   | 1 | 1 | 1 | 1 | 1 | 5 |
|              |                         |                                                                                                                                                                    |                       |              |              |              |         |                    |                           |               |               | Carotenoids  | -0.70823       | -3.57, 1.88    |   |   |   |   |   |   |
|              |                         |                                                                                                                                                                    |                       |              |              |              |         |                    |                           |               |               | Phenols      | -0.72954       | -2.48, 0.45    |   |   |   |   |   |   |
|              |                         |                                                                                                                                                                    |                       |              |              |              |         |                    |                           |               |               | Yield        | -14.8539       | -20.45, -9.25  |   |   |   |   |   |   |
| 93           | Kumar et al 2007        | Response of onion ( <i>Allium cepa</i> L.) to different levels of irrigation water                                                                                 | Field Experiment      | India        | Tropical     | Onion        | Root    | Water Availability | -50%                      | Yield         |               |              | -33.07         | -47.28, -11.96 | 1 | 1 | 1 | 1 | 0 | 4 |
| 94           | Kumar et al 2015        | Influence of growth stage specific water stress on the yield, physico-chemical quality and functional characteristics of tomato grown in shallow basaltic soils    | Field Experiment      | India        | Tropical     | Tomato       | Solanum | Water Availability | -50%                      | Yield         | Nutr. Quality | Vit. C       | 85.0956        | 81.84, 88.35   | 1 | 1 | 1 | 1 | 1 | 5 |
|              |                         |                                                                                                                                                                    |                       |              |              |              |         |                    |                           |               |               | Carotenoids  | 304.1795       | 115.96, 564.02 |   |   |   |   |   |   |
|              |                         |                                                                                                                                                                    |                       |              |              |              |         |                    |                           |               |               | Phenols      | 55.28905       | 45.13, 65.45   |   |   |   |   |   |   |
|              |                         |                                                                                                                                                                    |                       |              |              |              |         |                    |                           |               |               | Flavonoids   | 99.39359       | 68.30, 140.87  |   |   |   |   |   |   |
|              |                         |                                                                                                                                                                    |                       |              |              |              |         |                    |                           |               |               | Antioxidants | 24.29114       | 18.59, 30.00   |   |   |   |   |   |   |
| Yield        | -24.6079                | -34.58, -14.63                                                                                                                                                     |                       |              |              |              |         |                    |                           |               |               |              |                |                |   |   |   |   |   |   |
| 95           | Kurunc et al 2011       | Salinity and drought affect yield response of bell pepper similarly                                                                                                | Greenhouse Experiment | Turkey       | N.A.         | Pepper       | Solanum | Water Availability | -50%                      | Yield         |               |              | -29.62         | -67.31, 18.81  | 1 | 1 | 1 | 1 | 0 | 4 |
|              |                         |                                                                                                                                                                    |                       |              |              |              |         | Salinity           | +25%                      |               |               |              | -2.72294       | -3.08, -2.02   |   |   |   |   |   |   |
| 96           | Laurie et al 2009       | Effect of moisture stress on growth and performance of orange fleshed sweet potato varieties                                                                       | Field Experiment      | South Africa | Sub-Tropical | Sweet Potato | Root    | Water Availability | -50%                      | Yield         |               |              | -51.14         | -63.28, 41.13  | 1 | 1 | 1 | 1 | 0 | 4 |
| 97           | Leskovar & Ahehara 2012 | Crop coefficient -based deficit irrigation and planting density for onion: growth, yield and bulb quality                                                          | Field Experiment      | US           | Sub-Tropical | Onion        | Root    | Water Availability | -50%                      | Yield         |               |              | -22.14         | -27.52, -15.54 | 1 | 1 | 1 | 1 | 0 | 4 |
| 98           | Li et al 1999           | Response of tomato plants to saline water as affected by carbon dioxide supplementation I. Growth, yield and fruit quality                                         | Greenhouse Experiment | Israel       | N.A.         | Tomato       | Solanum | CO2                | +250ppm                   | Yield         |               |              | 1.251669       |                | 1 | 1 | 1 | 1 | 0 | 4 |
|              |                         |                                                                                                                                                                    |                       |              |              |              |         | Salinity           | +25%                      |               |               |              | -2.62736       | -3.21, -1.67   |   |   |   |   |   |   |
|              |                         |                                                                                                                                                                    |                       |              |              |              |         | CO2 & Salinity     | +250ppmCO2 & +25%Salinity |               |               |              | -              |                |   |   |   |   |   |   |
| 99           | Luoh et al 2014         | Nutritional yield of African indigenous vegetables in water-deficient and water-sufficient conditions                                                              | Greenhouse Experiment | Taiwan       | N.A.         | Kale         | Leafy   | Water Availability | -50%                      | Nutr. Quality | Carotenoids   | 19.11048     | 19.10, 19.12   | 1              | 1 | 1 | 1 | 0 | 4 |   |
|              |                         |                                                                                                                                                                    |                       |              |              | Nightshade   | Solanum |                    |                           |               |               | 46.85651     | 26.49, 67.23   |                |   |   |   |   |   |   |
|              |                         |                                                                                                                                                                    |                       |              |              | Kale         | Leafy   |                    |                           |               |               | 48.11849     | 37.25, 58.99   |                |   |   |   |   |   |   |
|              |                         |                                                                                                                                                                    |                       |              |              | Nightshade   | Solanum |                    |                           |               |               | -52.9625     | -78.65, -27.27 |                |   |   |   |   |   |   |
|              |                         |                                                                                                                                                                    |                       |              |              | Kale         | Leafy   |                    |                           |               |               | 58.56719     | 45.89, 71.25   |                |   |   |   |   |   |   |
| Antioxidants |                         |                                                                                                                                                                    |                       |              |              |              |         |                    |                           |               |               |              |                |                |   |   |   |   |   |   |

| ID  | Author                     | Description                                                                                                                                                   | Experiment            | Country | Climate      | Crop             | Genus   | Stressor           | Stress Level      | Yield         | Nutr. Quality | Yield       |                | Y1            | Y2 | Y3 | Y4 | Y5 | Y6 |              |
|-----|----------------------------|---------------------------------------------------------------------------------------------------------------------------------------------------------------|-----------------------|---------|--------------|------------------|---------|--------------------|-------------------|---------------|---------------|-------------|----------------|---------------|----|----|----|----|----|--------------|
|     |                            |                                                                                                                                                               |                       |         |              |                  |         |                    |                   |               |               | Min         | Max            |               |    |    |    |    |    |              |
|     |                            |                                                                                                                                                               |                       |         |              | Nightshade       | Solanum |                    |                   |               |               | 48.22762    | 42.38, 54.08   |               |    |    |    |    |    |              |
|     |                            |                                                                                                                                                               |                       |         |              | Kale             | Leafy   |                    |                   |               |               | Ca          | 11.97569       |               |    |    |    |    |    | 11.62, 12.33 |
|     |                            |                                                                                                                                                               |                       |         |              | Nightshade       | Solanum |                    |                   |               |               | 48.80167    | 24.17, 73.43   |               |    |    |    |    |    |              |
|     |                            |                                                                                                                                                               |                       |         |              | Kale             | Leafy   |                    |                   |               |               | Fe          | 9.905887       |               |    |    |    |    |    | -6.83, 26.64 |
|     |                            |                                                                                                                                                               |                       |         |              | Nightshade       | Solanum |                    |                   |               |               | 34.36328    | 30.76, 37.96   |               |    |    |    |    |    |              |
|     |                            |                                                                                                                                                               |                       |         |              | Kale             | Leafy   |                    |                   |               |               | Zn          | 32.62985       |               |    |    |    |    |    | 14.83, 50.43 |
|     |                            |                                                                                                                                                               |                       |         |              | Nightshade       | Solanum |                    |                   |               |               | 9.92647     | -13.24, 33.09  |               |    |    |    |    |    |              |
| 100 | Lutfur Rahman et al 2000   | Effects of water stress and temperature on sod activity, growth and yield of tomato                                                                           | Greenhouse Experiment | Japan   | N.A.         | Tomato           | Solanum | Temperature        | +4°C              | Yield         |               | -2.65078    | -3.51, -1.79   | 1             | 1  | 1  | 1  | 0  | 4  |              |
| 101 | Magán et al 2008           | Effects of salinity on fruit yield and quality of tomato grown in soil-less culture in greenhouses in Mediterranean climatic conditions                       | Greenhouse Experiment | Spain   | N.A.         | Tomato           | Solanum | Salinity           | +25%              | Yield         |               | -2.655      | -8.76, 9.34    | 1             | 1  | 1  | 1  | 0  | 4  |              |
| 102 | Maggio et al 2004          | Physiological response of tomato to saline irrigation in long-term salinized soils                                                                            | Field Experiment      | Italy   | Sub-Tropical | Tomato           | Solanum | Salinity           | +25%              | Yield         |               | -0.23674    | -0.43, -0.14   | 1             | 1  | 1  | 1  | 0  | 4  |              |
| 103 | Maggio et al 2005          | Physiological response of field-grown cabbage to salinity and drought stress                                                                                  | Field Experiment      | Italy   | Sub-Tropical | Cabbage          | Leafy   | Water Availability | -50%              | Yield         |               | -95.18      |                | 1             | 1  | 1  | 1  | 0  | 4  |              |
|     |                            |                                                                                                                                                               |                       |         |              |                  |         | Salinity           | +25%              |               |               | -0.86277    |                |               |    |    |    |    |    | -1.09, -0.64 |
| 104 | Mamatha et al 2014         | Impact of elevated CO2 on growth, physiology, yield, and quality of tomato (Lycopersicon esculentum Mill) cv. Arka Ashish                                     | Field Experiment      | India   | Tropical     | Tomato           | Solanum | CO2                | +250ppm           | Yield         | Nutr. Quality | Flavonoids  | -23.5895       | -41.51, -5.67 | 1  | 1  | 1  | 1  | 0  | 4            |
|     |                            |                                                                                                                                                               |                       |         |              |                  |         |                    |                   |               |               | Vit. C      | 27.64766       | 12.60, 42.69  |    |    |    |    |    |              |
|     |                            |                                                                                                                                                               |                       |         |              |                  |         |                    |                   |               |               | Carotenoids | -1.65736       | -7.24, 4.46   |    |    |    |    |    |              |
|     |                            |                                                                                                                                                               |                       |         |              |                  |         |                    |                   |               |               | Yield       | 88.81          | 79.73, 97.89  |    |    |    |    |    |              |
| 105 | Manderscheid & Weigel 1995 | Do increasing atmospheric CO2 concentrations contribute to yield increases in German crops?                                                                   | Field Experiment      | Germany | Temperate    | Bean             | Legume  | CO2                | +250ppm           | Yield         |               | -27.27      | -37.92, -16.63 | 1             | 1  | 1  | 1  | 1  | 5  |              |
| 106 | Martinez et al 2012        | Effects of saline water on water status, yield and fruit quality of Wild (Solanum chilense) and domesticated (Solanum lycopersicum var. Cerasiforme) tomatoes | Greenhouse Experiment | Chile   | N.A.         | Tomato           | Solanum | Salinity           | +25%              | Yield         |               | -2.08333    | -5.12, 0.68    | 1             | 1  | 1  | 1  | 0  | 4  |              |
| 107 | May, 1993                  | Moisture stress to maximize processing tomato yield and fruit quality                                                                                         | Field Experiment      | US      | Temperate    | Tomato           | Solanum | Water Availability | -50%              | Yield         |               | -22.68      | -28.10, 11.76  | 1             | 1  | 1  | 1  | 0  | 4  |              |
| 108 | Meng et al 2011            | Effects of simulated acid rain on main nutritional indicators of three leafy vegetables                                                                       | Greenhouse Experiment | China   | N.A.         | Pakchoi, Lettuce | Leafy   | Water Quality      | Waste vs. Potable | Nutr. Quality | Vit. C        | -6.64       | -35.44, 15.52  | 1             | 1  | 1  | 1  | 0  | 4  |              |

|     |                       |                                                                                                                                                                                                |                       |              |           |           |        |                    |                   |               |                |                |              |   |   |   |   |   |   |
|-----|-----------------------|------------------------------------------------------------------------------------------------------------------------------------------------------------------------------------------------|-----------------------|--------------|-----------|-----------|--------|--------------------|-------------------|---------------|----------------|----------------|--------------|---|---|---|---|---|---|
| 109 | Mishra & Agrawal 2014 | Cultivar specific response of CO2 fertilisation on two tropical mung bean ( <i>Vigna radiata</i> L.) cultivars: ROS generation, antioxidant status, physiology, growth, yield and seed quality | Field Experiment      | India        | Tropical  | Mung Bean | Legume | CO2                | +250ppm           | Yield         |                | 30.3           | 27.84, 32.67 | 1 | 1 | 1 | 1 | 1 | 5 |
| 110 | Mogren et al 2015     | Moderate water stress prevents the postharvest decline of ascorbic acid in spinach ( <i>Spinacia oleracea</i> L.) but not in spinach beet ( <i>Beta vulgaris</i> L.)                           | Greenhouse Experiment | UK           | N.A.      | Spinach   | Leafy  | Water Availability | -50%              | Nutr. Quality | Vit. C         | 4.906825       | 4.38, 5.43   | 1 | 1 | 1 | 1 | 0 | 4 |
| 111 | Mortensen LM 1994     | Effects of elevated CO2 concentrations on growth and yield of eight vegetable species in a cool climate                                                                                        | Field Experiment      | Norway       | Boreal    | Leek      | Leafy  | CO2                | +250ppm           | Yield         |                |                | 2.653745     | 1 | 1 | 1 | 1 | 1 | 5 |
|     |                       |                                                                                                                                                                                                |                       |              |           | Celery    |        |                    |                   |               |                |                | -2.15715     |   |   |   |   |   |   |
|     |                       |                                                                                                                                                                                                |                       |              |           | Lettuce   |        |                    |                   |               |                |                | 4.376796     |   |   |   |   |   |   |
|     |                       |                                                                                                                                                                                                |                       |              |           | Cabbage   |        |                    |                   |               |                |                | 1.706555     |   |   |   |   |   |   |
|     |                       |                                                                                                                                                                                                |                       |              |           | Parsley   | Root   |                    |                   |               |                |                | 3.670661     |   |   |   |   |   |   |
|     |                       |                                                                                                                                                                                                |                       |              |           | Carrot    |        |                    |                   |               |                |                | 4.719464     |   |   |   |   |   |   |
|     |                       |                                                                                                                                                                                                |                       |              |           | Onion     |        |                    |                   |               |                |                | 12.92492     |   |   |   |   |   |   |
|     |                       |                                                                                                                                                                                                |                       |              |           | Celeriac  |        |                    |                   |               |                |                | -3.72691     |   |   |   |   |   |   |
| 112 | Mzini et al 2015      | Effects of irrigation water quality on vegetables Part 2: Chemical and nutritional content                                                                                                     | Field Experiment      | South Africa | Temperate | Cabbage   | Leafy  | Water Quality      | Waste vs. Potable | Nutr. Quality | Ca             | 5.47           | 0, 18.75     | 1 | 1 | 1 | 1 | 0 | 4 |
|     |                       |                                                                                                                                                                                                |                       |              |           | Mg        |        |                    |                   |               | 12.5           | 0, 25.00       |              |   |   |   |   |   |   |
|     |                       |                                                                                                                                                                                                |                       |              |           | K         |        |                    |                   |               | -7.69          | -7.69, -7.69   |              |   |   |   |   |   |   |
|     |                       |                                                                                                                                                                                                |                       |              |           | Zn        |        |                    |                   |               | 5.27           | -12.50, 34.78  |              |   |   |   |   |   |   |
|     |                       |                                                                                                                                                                                                |                       |              |           | Cu        |        |                    |                   |               | 2.88           | -10.91, 22.22  |              |   |   |   |   |   |   |
|     |                       |                                                                                                                                                                                                |                       |              |           | Fe        |        |                    |                   |               | 166.45         | -16.67, 469.23 |              |   |   |   |   |   |   |
|     |                       |                                                                                                                                                                                                |                       |              |           | Mn        |        |                    |                   |               | 29.97          | -7.37, 97.24   |              |   |   |   |   |   |   |
|     |                       |                                                                                                                                                                                                |                       |              |           | Ca        |        |                    |                   |               | 13.93          | -6.67, 35.71   |              |   |   |   |   |   |   |
|     |                       |                                                                                                                                                                                                |                       |              |           | Mg        | 0      |                    |                   |               | 0.00           |                |              |   |   |   |   |   |   |
|     |                       |                                                                                                                                                                                                |                       |              |           | K         | -4.17  |                    |                   |               | -8.33, 0.00    |                |              |   |   |   |   |   |   |
|     |                       |                                                                                                                                                                                                |                       |              |           | Zn        | 30.9   |                    |                   |               | -26.32, 110.53 |                |              |   |   |   |   |   |   |
|     |                       |                                                                                                                                                                                                |                       |              |           | Cu        | 7.69   |                    |                   |               | -25.00, 25.00  |                |              |   |   |   |   |   |   |
|     |                       |                                                                                                                                                                                                |                       |              |           | Fe        | 53.83  |                    |                   |               | 21.43, 128.57  |                |              |   |   |   |   |   |   |
|     |                       |                                                                                                                                                                                                |                       |              |           | Mn        | 58.62  |                    |                   |               | -10.34, 144.83 |                |              |   |   |   |   |   |   |
|     |                       |                                                                                                                                                                                                |                       |              |           | Ca        | 63.64  |                    |                   |               | 27.27, 100.00  |                |              |   |   |   |   |   |   |
|     |                       |                                                                                                                                                                                                |                       |              |           | Mg        | 35.71  |                    |                   |               | -7.14, 78.57   |                |              |   |   |   |   |   |   |
|     |                       |                                                                                                                                                                                                |                       |              |           | K         | 14.71  |                    |                   |               | 11.76, 17.65   |                |              |   |   |   |   |   |   |
|     |                       |                                                                                                                                                                                                |                       |              |           | Zn        | 32.69  |                    |                   |               | 9.62, 55.77    |                |              |   |   |   |   |   |   |
|     |                       |                                                                                                                                                                                                |                       |              |           | Cu        | -71.82 |                    |                   |               | -74.55, -69.09 |                |              |   |   |   |   |   |   |
|     |                       |                                                                                                                                                                                                |                       |              |           | Fe        | -30    |                    |                   |               | -36.00, -24.00 |                |              |   |   |   |   |   |   |
|     |                       |                                                                                                                                                                                                |                       |              |           | Mn        | -3.06  |                    |                   |               | -30.61, 24.49  |                |              |   |   |   |   |   |   |
|     |                       |                                                                                                                                                                                                |                       |              |           | Pb        | 160.34 |                    |                   |               | 33.33, 287.36  |                |              |   |   |   |   |   |   |
|     |                       |                                                                                                                                                                                                |                       |              |           | Ca        | 8.33   |                    |                   |               | 0, 16.67       |                |              |   |   |   |   |   |   |
|     |                       |                                                                                                                                                                                                |                       |              |           | Onion     | Root   |                    |                   |               |                |                |              |   |   |   |   |   |   |
|     |                       |                                                                                                                                                                                                |                       |              |           | Chard     |        |                    |                   |               | Leafy          |                |              |   |   |   |   |   |   |
|     |                       |                                                                                                                                                                                                |                       |              |           |           |        |                    |                   |               |                |                |              |   |   |   |   |   |   |
|     |                       |                                                                                                                                                                                                |                       |              |           |           |        |                    |                   |               |                |                |              |   |   |   |   |   |   |
|     |                       |                                                                                                                                                                                                |                       |              |           | Beetroot  | Root   |                    |                   |               |                |                |              |   |   |   |   |   |   |

|    |        |                |
|----|--------|----------------|
| Mg | 16.67  | 0, 33.33       |
| K  | 5.26   | -5.26, 15.79   |
| Zn | 71.43  | 32.14, 110.71  |
| Cu | -28.85 | -38.46, -19.23 |
| Fe | -40.41 | -57.53, -23.29 |
| Mn | -32.23 | -39.67, -24.79 |
| Pb | 0.52   | -17.53, 18.56  |
| Ca | -51.52 | -57.58, -45.45 |
| Mg | 12.5   | -25.00, 0.00   |
| K  | 28.57  | 26.19, 30.95   |
| Zn | -50    | -50.00, -50.00 |
| Cu | 14.46  | -3.61, 32.53   |
| Fe | 26.79  | 3.57, 50.00    |
| Mn | -13.4  | -20.92, -5.88  |
| Pb | 56.67  | -40.00, 153.33 |
| Ca | -6.25  | -25.00, 12.50  |
| Mg | -25    | -50.00, 0.00   |
| K  | 47.73  | 9.09, 86.36    |
| Zn | -30    | -36.00, -24.00 |
| Cu | -71.82 | -74.55, -69.09 |
| Fe | -30    | -36.00, -24.00 |
| Mn | -3.06  | -30.61, 24.49  |
| Pb | 160.34 | 33.33, 287.36  |

|     |                     |                                                                                                                                                            |                                          |            |          |          |           |                    |      |               |        |          |                |   |   |   |   |   |   |
|-----|---------------------|------------------------------------------------------------------------------------------------------------------------------------------------------------|------------------------------------------|------------|----------|----------|-----------|--------------------|------|---------------|--------|----------|----------------|---|---|---|---|---|---|
|     |                     |                                                                                                                                                            |                                          |            |          | Lettuce  | Leafy     |                    |      |               |        |          |                |   |   |   |   |   |   |
|     |                     |                                                                                                                                                            |                                          |            |          | Carrot   | Root      |                    |      |               |        |          |                |   |   |   |   |   |   |
| 113 | Nahar & Ullah 2012  | Morphological and physiological characters of tomato ( <i>Lycopersicon esculentum</i> Mill) cultivars under water stress                                   | Greenhouse Experiment                    | Bangladesh | N.A.     | Tomato   | Solanum   | Water Availability | -50% | Yield         |        | 56.86526 | 35.15, 78.59   | 1 | 1 | 1 | 1 | 0 | 4 |
| 114 | Nahar et al 2002    | Effect of water stress on nutrient uptake, yield and quality of tomato ( <i>Lycopersicon esculentum</i> Mill.) under subtropical conditions                | Field Experiment & Greenhouse Experiment | Bangladesh | N.A.     | Tomato   | Solanum   | Water Availability | -50% | Nutr. Quality | Vit. C | 59.52381 | 55.56, 63.49   | 1 | 1 | 1 | 1 | 0 | 4 |
|     |                     |                                                                                                                                                            |                                          |            |          |          |           |                    |      | Yield         |        | 110.0742 | 33.50, 186.65  |   |   |   |   |   |   |
| 115 | Najarian et al 2015 | Interactive effects of drought stress and ozonated water on growth and yield of cucumber ( <i>Cucumis sativus</i> L.)                                      | Greenhouse Experiment                    | Iran       | N.A.     | Cucumber | Cucurbits | O3                 | +25% | Yield         |        | *        |                | 1 | 1 | 1 | 1 | 0 | 4 |
|     |                     |                                                                                                                                                            |                                          |            |          |          |           | Water Availability | -50% |               |        | -19.3662 | -21.13, -17.61 |   |   |   |   |   |   |
| 116 | Nangare et al 2013  | Effect of blending fresh-saline water and discharge rate of drip on plant yield, water use efficiency (WUE) and quality of tomato in semi-arid environment | Field Experiment                         | India      | Tropical | Tomato   | Solanum   | Salinity           | +25% | Nutr. Quality | Vit. C | 0.17     | 0.02, 0.35     | 1 | 1 | 1 | 1 | 0 | 4 |

|     |                         |                                                                                                                                                                     |                       |         |              |             |         |                    |                           |               |                              |          |                |  |   |   |   |   |   |   |
|-----|-------------------------|---------------------------------------------------------------------------------------------------------------------------------------------------------------------|-----------------------|---------|--------------|-------------|---------|--------------------|---------------------------|---------------|------------------------------|----------|----------------|--|---|---|---|---|---|---|
| 117 | Navarro et al 2006      | Changes in the contents of antioxidant compounds in pepper fruits at different ripening stages, as affected by salinity                                             | Greenhouse Experiment | Spain   | N.A.         | Pepper      | Solanum | Salinity           | +25%                      | Nutr. Quality | Vit. C, Carotenoids, Phenols | *        |                |  | 1 | 1 | 1 | 1 | 0 | 4 |
| 118 | Nikou et al 2013        | Effect of irrigation on the relationships between leaf gas exchange related traits and yield in dwarf dry bean grown under Mediterranean conditions                 | Field Experiment      | Greece  | Sub-Tropical | Common bean | Legume  | Water Availability | -50%                      | Yield         |                              | -19.99   | -24.51, -15.44 |  | 1 | 1 | 1 | 1 | 0 | 4 |
| 119 | Olympios et al 2003     | The growth, yield and quality of greenhouse tomatoes in relation to salinity applied at different stages of plant growth                                            | Greenhouse Experiment | Greece  | N.A.         | Tomato      | Solanum | Salinity           | +25%                      | Yield         |                              | -4.53204 | -5.74, -3.78   |  | 1 | 1 | 1 | 1 | 0 | 4 |
| 120 | Ors & Suarez 2016       | Salt tolerance of spinach as related to seasonal climate                                                                                                            | Field Experiment      | US      | Sub-Tropical | Spinach     | Leafy   | Salinity           | +25%                      | Yield         |                              | 1.358017 | -0.70, 5.76    |  | 1 | 1 | 1 | 1 | 1 | 5 |
| 121 | Palese 2010             | Effects of water deficit on the vegetative response, yield and oil quality of olive trees ( <i>Olea europaea</i> L., cv Coratina) grown under intensive cultivation | Field Experiment      | Italy   | Sub-Tropical | Olive       | Drupe   | Water Availability | -50%                      | Nutr. Quality | Phenols                      | -6.9606  | -7.48, -6.44   |  | 1 | 1 | 1 | 1 | 1 | 5 |
|     |                         |                                                                                                                                                                     |                       |         |              |             |         |                    |                           | Yield         |                              | -12.898  | -21.68, -4.12  |  |   |   |   |   |   |   |
| 122 | Patane & Cosentino 2009 | Effects of soil water deficit on yield and quality of processing tomato under a Mediterranean climate                                                               | Field Experiment      | Italy   | Sub-Tropical | Tomato      | Solanum | Water Availability | -50%                      | Yield         |                              | -17.87   | -28.58, -7.28  |  | 1 | 1 | 1 | 1 | 0 | 4 |
| 123 | Pejic et al 2011        | Effect of irrigation schedules on yield and water use of onion ( <i>Allium cepa</i> L.)                                                                             | Field Experiment      | Serbia  | Temperate    | Onion       | Root    | Water Availability | -50%                      | Yield         |                              | -14.16   | -35.53, 0.35   |  | 1 | 1 | 1 | 1 | 0 | 4 |
| 124 | Pek et al 2014          | Effect of irrigation on yield parameters and antioxidant profiles of processing cherry tomato                                                                       | Field Experiment      | Hungary | Temperate    | Tomato      | Solanum | Water Availability | -50%                      | Nutr. Quality | Carotenoids                  | 10.24    | -17.86, 48.08  |  | 1 | 1 | 1 | 1 | 1 | 5 |
|     |                         |                                                                                                                                                                     |                       |         |              |             |         |                    |                           | Yield         |                              | -20.8232 | -29.07, -12.58 |  |   |   |   |   |   |   |
| 125 | Pereira et al 2014      | Genetic variability for iron and zinc content in common bean lines and interaction with water availability                                                          | Field Experiment      | Brazil  | Tropical     | Common Bean | Legume  | Water Availability | -50%                      | Nutr. Quality | Fe                           | 3.52     | -11.74, 26.20  |  | 1 | 1 | 1 | 1 | 0 | 4 |
|     |                         |                                                                                                                                                                     |                       |         |              |             |         |                    |                           |               | Zn                           | 8.5      | -21.91, 39.47  |  |   |   |   |   |   |   |
| 126 | Pérez-López et al 2013  | Lettuce production and antioxidant capacity are differentially modified by salt stress and light intensity under ambient and elevated CO2                           | Greenhouse Experiment | Spain   | N.A.         | Lettuce     | Leafy   | CO2                | +250ppm                   | Yield         |                              | 55.27    | 46.15, 64.39   |  | 1 | 1 | 1 | 1 | 0 | 4 |
|     |                         |                                                                                                                                                                     |                       |         |              |             |         | CO2 & Salinity     | +250ppmCO2 & +25%Salinity |               |                              | +        |                |  |   |   |   |   |   |   |

|       |                         |                                                                                                                                                |                       |                |              |             |         |                    |                           |               |                      |               |                |   |   |   |   |   |   |
|-------|-------------------------|------------------------------------------------------------------------------------------------------------------------------------------------|-----------------------|----------------|--------------|-------------|---------|--------------------|---------------------------|---------------|----------------------|---------------|----------------|---|---|---|---|---|---|
| 127   | Perez-Lopez et al 2015  | Growth and nutritional quality improvement in two differently pigmented lettuce cultivars grown under elevated CO2 and/or salinity             | Greenhouse Experiment | Spain          | N.A.         | Lettuce     | Leafy   | CO2 & Salinity     | +250ppmCO2 & +25%Salinity | Yield         |                      | +             |                | 1 | 1 | 1 | 1 | 0 | 4 |
| 128   | Perez-Lopez et al 2015b | Interacting effects of high light and elevated CO2 on the nutraceutical quality of two differently pigmented Lactuca sativa cultivars (Blonde) | Greenhouse Experiment | Spain          | N.A.         | Lettuce     | Leafy   | CO2                | +250ppm                   | Nutr. Quality | Antioxidant capacity | 89.21372      | 52.08, 126.34  | 1 | 1 | 1 | 1 | 0 | 4 |
|       |                         |                                                                                                                                                |                       |                |              |             |         |                    |                           |               | K                    | 1.612103      | -1.98, 5.21    |   |   |   |   |   |   |
|       |                         |                                                                                                                                                |                       |                |              |             |         |                    |                           |               | Ca                   | 0.728921      | -7.41, 8.87    |   |   |   |   |   |   |
|       |                         |                                                                                                                                                |                       |                |              |             |         |                    |                           |               | Mg                   | -8.24991      | -10.75, -5.75  |   |   |   |   |   |   |
|       |                         |                                                                                                                                                |                       |                |              |             |         |                    |                           |               | Fe                   | -13.3021      | -22.06, -4.55  |   |   |   |   |   |   |
|       |                         |                                                                                                                                                |                       |                |              |             |         |                    |                           |               | Zn                   | -2.29167      | -6.25, 1.67    |   |   |   |   |   |   |
|       |                         |                                                                                                                                                |                       |                |              |             |         |                    |                           |               | Carotenoids          | -8.20707      | -13.89, -2.53  |   |   |   |   |   |   |
|       |                         |                                                                                                                                                |                       |                |              |             |         |                    |                           |               | Vit. C               | 23.16572      | -2.69, 49.02   |   |   |   |   |   |   |
|       |                         |                                                                                                                                                |                       |                |              |             |         |                    |                           | Flavonoids    | 4.57702              | -31.25, 40.40 |                |   |   |   |   |   |   |
| Yield |                         | 31.81                                                                                                                                          | 6.94, 56.67           |                |              |             |         |                    |                           |               |                      |               |                |   |   |   |   |   |   |
| 129   | Perniola et al 1993     | Yield response to water and stress indexes on tomato                                                                                           | Field Experiment      | Italy          | Sub-Tropical | Tomato      | Solanum | Water Availability | -50%                      | Yield         |                      | -39.49        | -47.09, -33.85 | 1 | 1 | 1 | 1 | 0 | 4 |
| 130   | Podlesny et al 2001     | The effect of drought on the development and yielding of two different varieties of the fodder broad bean (Vicia faba minor)                   | Greenhouse Experiment | Poland         | N.A.         | Bean        | Legume  | Water Availability | -50%                      | Yield         |                      | -22.66        | -37.50, -14.58 | 1 | 1 | 1 | 1 | 0 | 4 |
| 131   | Pokluda et al 2014      | The effect of irrigation on the economic and nutritional characteristics of selected vegetables                                                | Field Experiment      | Czech Republic | Temperate    | Tomato      | Solanum | Water Availability | -50%                      | Nutr. Quality | Antioxidant capacity | -31.3597      | -54.17, -8.55  | 1 | 1 | 1 | 1 | 0 | 4 |
|       |                         |                                                                                                                                                |                       |                |              | Pepper      |         |                    |                           |               |                      | 3.616285      | -14.34, 21.57  |   |   |   |   |   |   |
|       |                         |                                                                                                                                                |                       |                |              | Leek        | Leafy   |                    |                           |               |                      | 7.781385      | -51.52, 67.09  |   |   |   |   |   |   |
| 132   | Prasad et al 2002       | Effects of elevated temperature and CO2 on seed set and yield of kidney bean                                                                   | Greenhouse Experiment | US             | N.A.         | Kidney Bean | Legume  | CO2                | +250ppm                   | Yield         |                      | 10.89588      |                | 1 | 1 | 1 | 1 | 0 | 4 |
|       |                         |                                                                                                                                                |                       |                |              |             |         | Temperature        | +4°C                      |               |                      | -41.9335      | -44.44, -40.68 |   |   |   |   |   |   |
|       |                         |                                                                                                                                                |                       |                |              |             |         | CO2 & Temp         | +250ppmCO2 & +4°C         |               |                      | -             |                |   |   |   |   |   |   |
| 133   | Rao et al 2012          | Relationship between survival and yield related traits in Solanum pimpinellifolium under salt stress                                           | Field Experiment      | Taiwan         | Sub-Tropical | Tomato      | Solanum | CO2                | +250ppm                   | Yield         |                      | 80.86         | 56.10, 105.62  | 1 | 1 | 1 | 1 | 0 | 4 |
|       |                         |                                                                                                                                                |                       |                |              |             |         | Salinity           | +25%                      |               |                      | -0.55352      | -0.58, -0.52   |   |   |   |   |   |   |
| 134   | Reinert et al 1997      | Growth and fruiting of tomato as influenced by elevated carbon dioxide and ozone                                                               | Greenhouse Experiment | US             | N.A.         | Tomato      | Solanum | O3                 | +25%                      | Yield         |                      | *             |                | 1 | 1 | 1 | 1 | 0 | 4 |
| 135   | Rezende et al 2003      | CO2 and irrigation in relation to yield and water use of the bell pepper crop                                                                  | Greenhouse Experiment | Brazil         | N.A.         | Pepper      | Solanum | CO2                | +250ppm                   | Yield         |                      | 0.23          | -7.90, 8.58    | 1 | 1 | 1 | 1 | 0 | 4 |
|       |                         |                                                                                                                                                |                       |                |              |             |         | Water Availability | -50%                      |               |                      | 120.27        | 76.19, 184.62  |   |   |   |   |   |   |

|     |                              |                                                                                                                                                                   |                       |        |              |              |           | CO2 & Water Availability | +250ppmCO2 & -50%Water Av. |               |                       |  |  |  |  |  |  |  |  |
|-----|------------------------------|-------------------------------------------------------------------------------------------------------------------------------------------------------------------|-----------------------|--------|--------------|--------------|-----------|--------------------------|----------------------------|---------------|-----------------------|--|--|--|--|--|--|--|--|
| 136 | Rodriguez et al 2015         | Effect of temperature stress on the early vegetative development of Brassica oleracea L.                                                                          | Greenhouse Experiment | Spain  | N.A.         | Cabbage Kale | Leafy     | Temperature              | +4°C                       | Yield         |                       |  |  |  |  |  |  |  |  |
|     |                              |                                                                                                                                                                   |                       |        |              |              |           |                          |                            |               |                       |  |  |  |  |  |  |  |  |
| 137 | Rop et al 2016               | Effects of deficit irrigation on yield and quality of onion crop                                                                                                  | Field Experiment      | Kenya  | Tropical     | Onion        | Root      | Water Availability       | -50%                       | Yield         |                       |  |  |  |  |  |  |  |  |
| 138 | Salvatori et al 2012         | Different O3 response of sensitive and resistant snap bean genotypes (Phaseolus vulgaris L.): the key role of growth stage, stomatal conductance and PSI activity | Greenhouse Experiment | Italy  | N.A.         | Snap Bean    | Legume    | O3                       | +25%                       | Yield         |                       |  |  |  |  |  |  |  |  |
| 139 | Sánchez-González et al 2016  | Carbon dioxide enrichment: a technique to mitigate the negative effects of salinity on the productivity of high value tomatoes                                    | Greenhouse Experiment | Spain  | N.A.         | Tomato       | Solanum   | CO2                      | +250ppm                    | Yield         |                       |  |  |  |  |  |  |  |  |
|     |                              |                                                                                                                                                                   |                       |        |              |              |           | Salinity                 | +25%                       |               |                       |  |  |  |  |  |  |  |  |
|     |                              |                                                                                                                                                                   |                       |        |              |              |           | CO2 & Salinity           | +250ppmCO2 & +25%Salinity  |               |                       |  |  |  |  |  |  |  |  |
| 140 | Sánchez-Guerrero et al 2005  | Effect of variable CO2 enrichment on greenhouse production in mild winter climates                                                                                | Greenhouse Experiment | Spain  | N.A.         | Cucumber     | Cucurbits | CO2                      | +250ppm                    | Yield         |                       |  |  |  |  |  |  |  |  |
| 141 | Sanchez-Rodriguez et al 2010 | Genotypic differences in some physiological parameters symptomatic for oxidative stress under moderate drought in tomato plants                                   | Greenhouse Experiment | Spain  | N.A.         | Tomato       | Solanum   | Water Availability       | -50%                       | Nutr. Quality | Vit. C                |  |  |  |  |  |  |  |  |
| 142 | Segura et al 2001            | The effects of CO2 enrichment on cucumber growth under greenhouse conditions                                                                                      | Greenhouse Experiment | Spain  | N.A.         | Cucumber     | Cucurbits | CO2                      | +250ppm                    | Yield         |                       |  |  |  |  |  |  |  |  |
| 143 | Sezen et al 2008             | Yield and quality response of drip irrigated green beans under full and deficit irrigation                                                                        | Field Experiment      | Turkey | Sub-Tropical | Green bean   | Legume    | Water Availability       | -50%                       | Yield         |                       |  |  |  |  |  |  |  |  |
| 144 | Shimomachi et al 2008        | Effect of Residual Salinity on Spinach Growth and Nutrient Contents in Polder Soil                                                                                | Greenhouse Experiment | Japan  | N.A.         | Spinach      | Leafy     | Salinity                 | +25%                       | Nutr. Quality | Vit. C, Ca, Mg, K, Fe |  |  |  |  |  |  |  |  |
| 145 | Singh et al 2013             | Synergistic action of tropospheric ozone and carbon dioxide on yield and nutritional quality of Indian mustard (Brassica juncea (L.) Czern.)                      | Field Experiment      | India  | Tropical     | Mustard      | Leafy     | CO2                      | +250ppm                    | Nutr. Quality | Ca                    |  |  |  |  |  |  |  |  |
|     |                              |                                                                                                                                                                   |                       |        |              |              |           |                          |                            |               | Mg                    |  |  |  |  |  |  |  |  |
|     |                              |                                                                                                                                                                   |                       |        |              |              |           |                          |                            |               | Zn                    |  |  |  |  |  |  |  |  |
|     |                              |                                                                                                                                                                   |                       |        |              |              |           |                          |                            |               | Fe                    |  |  |  |  |  |  |  |  |



|     |                         |                                                                                                                                        |                       |         |              |             |         |                    |                     |               |        |          |                |   |   |   |   |   |   |  |
|-----|-------------------------|----------------------------------------------------------------------------------------------------------------------------------------|-----------------------|---------|--------------|-------------|---------|--------------------|---------------------|---------------|--------|----------|----------------|---|---|---|---|---|---|--|
|     |                         |                                                                                                                                        |                       |         |              |             |         | O3                 | +25%                |               | Ca     |          |                |   |   |   |   |   |   |  |
|     |                         |                                                                                                                                        |                       |         |              |             |         |                    |                     |               | Mg     |          |                |   |   |   |   |   |   |  |
|     |                         |                                                                                                                                        |                       |         |              |             |         |                    |                     |               | Zn     |          |                |   |   |   |   |   |   |  |
|     |                         |                                                                                                                                        |                       |         |              |             |         |                    |                     |               | Fe     |          |                |   |   |   |   |   |   |  |
|     |                         |                                                                                                                                        |                       |         |              |             |         | CO2 & O3           | +250ppmCO2 & +25%O3 |               | Ca     | -        |                |   |   |   |   |   |   |  |
|     |                         |                                                                                                                                        |                       |         |              |             |         |                    |                     |               | Mg     | -        |                |   |   |   |   |   |   |  |
|     |                         |                                                                                                                                        |                       |         |              |             |         |                    |                     |               | Zn     | -        |                |   |   |   |   |   |   |  |
|     |                         |                                                                                                                                        |                       |         |              |             |         |                    |                     |               | Fe     | -        |                |   |   |   |   |   |   |  |
|     |                         |                                                                                                                                        |                       |         |              |             |         | CO2                | +250ppm             | Yield         |        | 6.24     | 5.99, 6.49     |   |   |   |   |   |   |  |
|     |                         |                                                                                                                                        |                       |         |              |             |         | O3                 | +25%                |               |        | -6.05    | -6.13, -5.97   |   |   |   |   |   |   |  |
|     |                         |                                                                                                                                        |                       |         |              |             |         | CO2 & O3           | +250ppmCO2 & +25%O3 |               |        |          |                |   |   |   |   |   |   |  |
| 146 | Soltekin et al 2012     | Response of Pepino ( <i>Solanum muricatum</i> Aiton) to salinity                                                                       | Greenhouse Experiment | Turkey  | N.A.         | Pepino      | Solanum | Salinity           | +25%                | Yield         |        | -3.27744 | -3.71, -2.85   | 1 | 1 | 1 | 1 | 0 | 4 |  |
| 147 | Sun et al 2014          | Effect of water stress on yield and nutrition quality of tomato plant overexpressing StAPX                                             | Greenhouse Experiment | China   | N.A.         | Tomato      | Solanum | Water Availability | -50%                | Nutr. Quality | Vit. C | 20.19231 | 13.46, 26.92   | 1 | 1 | 1 | 1 | 0 | 4 |  |
|     |                         |                                                                                                                                        |                       |         |              |             |         |                    |                     | Yield         |        | -66.0803 | -68.33, -63.83 |   |   |   |   |   |   |  |
| 148 | Temple PJ 1991          | Variations in responses of dry bean ( <i>Phaseolus vulgaris</i> ) cultivars to ozone                                                   | Field Experiment      | US      | Sub-Tropical | Pea Bean    | Legume  | O3                 | +25%                | Yield         |        | -15.85   | -29.11, -2.59  | 1 | 1 | 1 | 1 | 0 | 4 |  |
|     |                         |                                                                                                                                        |                       |         |              | Kidney Bean |         |                    |                     |               |        | 0.17     | -2.14, 2.49    |   |   |   |   |   |   |  |
|     |                         |                                                                                                                                        |                       |         |              | Pink Bean   |         |                    |                     |               |        | -4.01    | -4.81, -3.44   |   |   |   |   |   |   |  |
| 149 | Tognetti et al 2006     | The effect of deficit irrigation on crop yield and vegetative development of <i>Olea europaea</i> L. (cvs. Frantoio and Leccino)       | Field Experiment      | Italy   | Sub-Tropical | Olive       | Drupe   | Water Availability | -50%                | Yield         |        | -25.17   | -39.60, -12.32 | 1 | 1 | 1 | 1 | 0 | 4 |  |
| 150 | Tripp et al 1991        | CO2 enhanced yield and foliar deformation among tomato genotypes in elevated CO2 environments                                          | Greenhouse Experiment | US      | N.A.         | Tomato      | Solanum | CO2                | +250ppm             | Yield         |        | 6.3      | 2.84, 13.10    | 1 | 1 | 1 | 1 | 0 | 4 |  |
| 151 | Ullah et al 1994        | Effect of seawater and soil salinity on ion uptake, yield and quality of tomato (fruit)                                                | Field Experiment      | Austria | Temperate    | Tomato      | Solanum | Salinity           | +25%                | Nutr. Quality | Vit. C | *        |                | 1 | 1 | 1 | 1 | 0 | 4 |  |
| 152 | Unlukara et al 2015     | Green long pepper growth under different saline and water regime conditions and usability of water consumption in plant salt tolerance | Greenhouse Experiment | Turkey  | N.A.         | Hot Pepper  | Solanum | Water Availability | -50%                | Yield         |        | -28.38   | -54.42, 7.15   | 1 | 1 | 1 | 1 | 0 | 4 |  |
|     |                         |                                                                                                                                        |                       |         |              |             |         | Salinity           | +25%                |               |        | -2.66014 | -3.71, -2.00   |   |   |   |   |   |   |  |
| 153 | Vanaja et al 2008       | Growth and yield responses of castor bean ( <i>Ricinus communis</i> L.) to two enhanced CO2 levels                                     | Field Experiment      | India   | Tropical     | Castor Bean | Legume  | CO2                | +250ppm             | Yield         |        | 167.26   | 124.75, 209.76 | 1 | 1 | 1 | 1 | 0 | 4 |  |
| 154 | Vandermeiren et al 2012 | Ozone effects on yield quality of spring oilseed rape and broccoli                                                                     | Field Experiment      | Belgium | Temperate    | Broccoli    | Leafy   | O3                 | +25%                | Nutr. Quality | Vit. C | -        |                | 1 | 1 | 1 | 1 | 0 | 4 |  |

|     |                        |                                                                                                                                       |                       |             |           |             |           |                          |                            |               |                |          |                |   |   |   |   |   |   |
|-----|------------------------|---------------------------------------------------------------------------------------------------------------------------------------|-----------------------|-------------|-----------|-------------|-----------|--------------------------|----------------------------|---------------|----------------|----------|----------------|---|---|---|---|---|---|
| 155 | Veit-Kohler et al 1999 | Effect of different water supply on plant growth and fruit quality of Lycopersicon esculentum                                         | Greenhouse Experiment | Germany     | N.A.      | Tomato      | Solanum   | Water Availability       | -50%                       | Nutr. Quality | Vit. C         | 76.58383 | 51.85, 101.32  | 1 | 1 | 1 | 1 | 1 | 5 |
|     |                        |                                                                                                                                       |                       |             |           |             |           |                          |                            | Yield         |                | -53.26   |                |   |   |   |   |   |   |
| 156 | Villora et al 2000     | Yield improvement in zucchini under salt stress: determining micronutrient balance                                                    | Greenhouse Experiment | Spain       | N.A.      | Zucchini    | Cucurbits | Salinity                 | +25%                       | Nutr. Quality | Fe, Mn, Zn, Cu | *        |                | 1 | 1 | 1 | 1 | 0 | 4 |
| 157 | Visser et al 1997      | The combined effects of CO2 concentration and solar UVB radiation on faba bean grown in open top chambers                             | Greenhouse Experiment | Netherlands | N.A.      | Faba bean   | Legume    | CO2                      | +250ppm                    | Yield         |                | 59.52381 |                | 1 | 1 | 1 | 1 | 0 | 4 |
| 158 | Wan et al 2007         | Effect of drip irrigation with saline water on tomato (Lycopersicon esculentum Mill) yield and water use in semi-humid area           | Field Experiment      | China       | Temperate | Tomato      | Solanum   | Salinity                 | +25%                       | Yield         |                | 0.131112 | -0.65, 1.31    | 1 | 1 | 1 | 1 | 0 | 4 |
| 159 | Wang et al 2012        | Effects of different water supply on water consumption and yield of pumpkins in a cold high altitude semi-arid region                 | Field Experiment      | China       | temperate | Pumpkin     | Cucurbit  | Water Availability       | -50%                       | Yield         |                | -14.8911 | -51.40, 21.62  | 1 | 1 | 1 | 1 | 0 | 4 |
| 160 | Webber et al 2009      | Response of two legume crops to soil salinity in gypsiferous soils                                                                    | Greenhouse Experiment | Canada      | N.A.      | Bean        | Legume    | Salinity                 | +25%                       | Yield         |                | -0.26032 | -0.49, -0.09   | 1 | 1 | 1 | 1 | 0 | 4 |
|     |                        |                                                                                                                                       |                       |             |           | Mung Bean   |           |                          |                            |               |                | -0.58238 | -0.68, -0.48   |   |   |   |   |   |   |
| 161 | Wheeler et al 1994     | The effects of CO2, temperature and their interaction on the growth and yield of carrot (Daucus carota L.)                            | Greenhouse Experiment | UK          | N.A.      | Carrot      | Root      | CO2                      | +250ppm                    | Yield         |                | 19.70443 |                | 1 | 1 | 1 | 1 | 0 | 4 |
|     |                        |                                                                                                                                       |                       |             |           |             |           | Temperature              | +4°C                       |               |                | 148      |                |   |   |   |   |   |   |
| 162 | Wheeler et al 1995     | Effects of CO2, temperature and their interaction on the growth, development and yield of cauliflower (Brassica oleracea L. botrytis) | Greenhouse Experiment | UK          | N.A.      | Cauliflower | Leafy     | CO2                      | +250ppm                    | Yield         |                | 33.5871  |                | 1 | 1 | 1 | 1 | 0 | 4 |
|     |                        |                                                                                                                                       |                       |             |           |             |           | Temperature              | +4°C                       |               |                | -162.55  |                |   |   |   |   |   |   |
|     |                        |                                                                                                                                       |                       |             |           |             |           | CO2 & Temp               | +250ppmCO2 & +4°C          |               |                | -        |                |   |   |   |   |   |   |
| 163 | Wu & Wang 1999         | Interaction of CO2 enrichment and drought on growth, water use, and yield of broad bean (Vicia faba)                                  | Field Experiment      | China       | Temperate | Broad Bean  | Legume    | CO2                      | +250ppm                    | Yield         |                | 80.71429 |                | 1 | 1 | 1 | 1 | 0 | 4 |
|     |                        |                                                                                                                                       |                       |             |           |             |           | Water Availability       | -50%                       |               |                | -47      | -60.00, -34.00 |   |   |   |   |   |   |
|     |                        |                                                                                                                                       |                       |             |           |             |           | CO2 & Water Availability | +250ppmCO2 & -50%Water Av. |               |                | -        |                |   |   |   |   |   |   |

|     |                     |                                                                                                                                                  |                       |       |              |                                                    |               |                    |                 |                        |                                                      |                                   |                                        |   |   |   |   |   |   |
|-----|---------------------|--------------------------------------------------------------------------------------------------------------------------------------------------|-----------------------|-------|--------------|----------------------------------------------------|---------------|--------------------|-----------------|------------------------|------------------------------------------------------|-----------------------------------|----------------------------------------|---|---|---|---|---|---|
| 164 | Wurr et al 1996     | Investigating trends in vegetable crop response to increasing temperature associated with climate change                                         | Greenhouse Experiment | UK    | N.A.         | Lettuce<br>Leek<br>Cauliflower                     | Leafy         | Temperature        | +4°C            | Yield                  |                                                      | 125<br>45.8333<br>38.19445        | 25, 225<br>-33.34, 125<br>37.50, 38.89 | 1 | 1 | 1 | 1 | 0 | 4 |
| 165 | Wurr et al 2000     | Climate change: a response surface study of the effects of CO2 and temperature on the growth of French beans                                     | Greenhouse Experiment | UK    | N.A.         | French beans                                       | Legume        | CO2<br>Temperature | +250ppm<br>+4°C | Yield                  |                                                      | 40.3<br>107.85                    | -0.11, 80.71                           | 1 | 1 | 1 | 1 | 0 | 4 |
| 166 | Xiao et al 2009     | Effects of temperature increase on pea production in a semi-arid region of China                                                                 | Field Experiment      | China | Temperate    | Pea                                                | Legume        | Temperature        | +4°C            | Yield                  |                                                      | -35.1512                          | -42.14, -31.49                         | 1 | 1 | 1 | 1 | 0 | 4 |
| 167 | Xu et al 2016       | Responses of Spinach to Salinity and Nutrient Deficiency in Growth, Physiology, and Nutritional Value                                            | Greenhouse Experiment | US    | N.A.         | Spinach                                            | Leafy         | Salinity           | +25%            | Nutr. Quality          | Carotenoids<br>Phenols<br>Flavonoids<br>Antioxidants | 2.47<br>0.35<br>2.667403<br>-0.27 |                                        | 1 | 1 | 1 | 1 | 0 | 4 |
| 168 | Yonekura et al 2005 | Impacts of O3 and CO2 enrichment on growth of Komatsuna ( <i>Brassica campestris</i> ) and Radish ( <i>Raphanus sativus</i> )                    | Greenhouse Experiment | Japan | N.A.         | Spinach<br>Radish                                  | Leafy<br>Root | O3                 | +25%            | Yield                  |                                                      | -0.15<br>-0.39                    | -0.25, -0.03<br>-0.56, -0.14           | 1 | 1 | 1 | 1 | 0 | 4 |
| 169 | Zare et al 2012     | Influence of drought stress on some traits in five mung bean ( <i>Vigna radiata</i> L. R.Wilczek) genotypes                                      | Field Experiment      | Iran  | Sub-Tropical | Mung Bean                                          | Legume        | Water Availability | -50%            | Yield                  |                                                      | -22.14                            | -42.42, -9.25                          | 1 | 1 | 1 | 1 | 0 | 4 |
| 170 | Zhai et al 2015     | The Effects of Saline Water Drip Irrigation on Tomato Yield, Quality, and Blossom-End Rot Incidence --- A 3a Case Study in the South of China    | Field Experiment      | China | Sub-Tropical | Tomato                                             | Solanum       | Salinity           | +25%            | Nutr. Quality<br>Yield | Vit. C                                               | 1.802154<br>-0.75184              | 0.91, 2.86<br>-1.30, 0.07              | 1 | 1 | 1 | 1 | 0 | 4 |
| 171 | Zhao et al 2011     | Inter- and intra-specific differences in the response of Chinese leafy vegetables to ozone                                                       | Greenhouse Experiment | UK    | N.A.         | Pakchoi,<br>Mustard Leaf,<br>Lettuce,<br>Coriander | Leafy         | O3                 | +25%            | Yield                  |                                                      | *                                 |                                        | 1 | 1 | 1 | 1 | 0 | 4 |
| 172 | Zheng et al 2013    | Effects of water deficits on growth, yield and water productivity of drip-irrigated onion ( <i>Allium cepa</i> L.) in an arid region of NW China | Field Experiment      | China | Temperate    | Onion                                              | Root          | Water Availability | -50%            | Yield                  |                                                      | -32.63                            | -43.04, -15.90                         | 1 | 1 | 1 | 1 | 0 | 4 |

|     |                  |                                                                                                                                                                                      |                       |       |           |           |         |                    |         |       |  |          |   |   |   |   |   |   |   |
|-----|------------------|--------------------------------------------------------------------------------------------------------------------------------------------------------------------------------------|-----------------------|-------|-----------|-----------|---------|--------------------|---------|-------|--|----------|---|---|---|---|---|---|---|
| 173 | Ziska et al 2007 | A quantitative and qualitative assessment of mung bean (Vigna mungo L. Wilczek) seed in response to elevated atmospheric carbon dioxide: potential changes in fatty acid composition | Field Experiment      | US    | Temperate | Mung Bean | Legume  | CO2                | +250ppm | Yield |  | 67.41748 |   | 1 | 1 | 1 | 1 | 0 | 4 |
| 174 | Zushi et al 2006 | Free amino acid contents of tomato fruit grown under water and salinity stresses                                                                                                     | Greenhouse Experiment | Japan | N.A.      | Tomato    | Solanum | Salinity           | +25%    | Yield |  | -0.08    | 1 | 1 | 1 | 1 | 0 | 4 |   |
|     |                  |                                                                                                                                                                                      |                       |       |           |           |         | Water Availability | -50%    |       |  | -29.03   |   |   |   |   |   |   |   |

## Appendix 5 – Results impact of ambient temperature

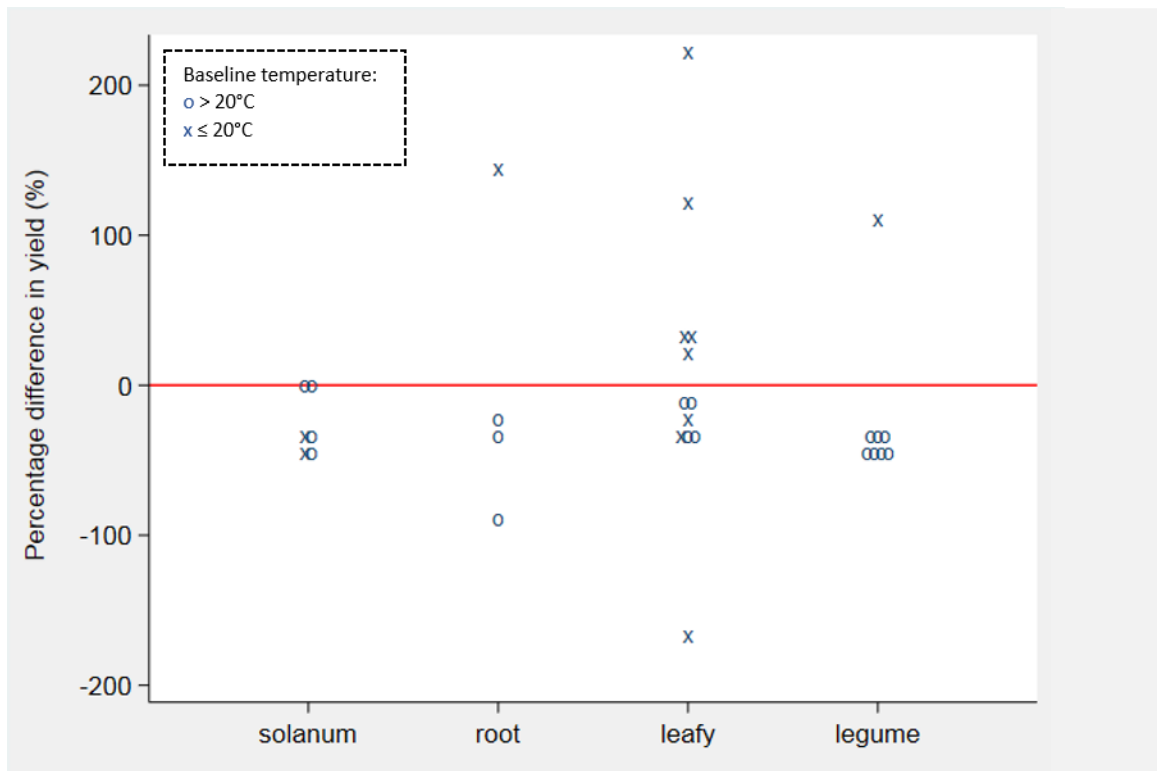

## Appendix 6 – Scatter Plots for “Tipping Point” Analysis

### A. Yield change per baseline temperature of experiments

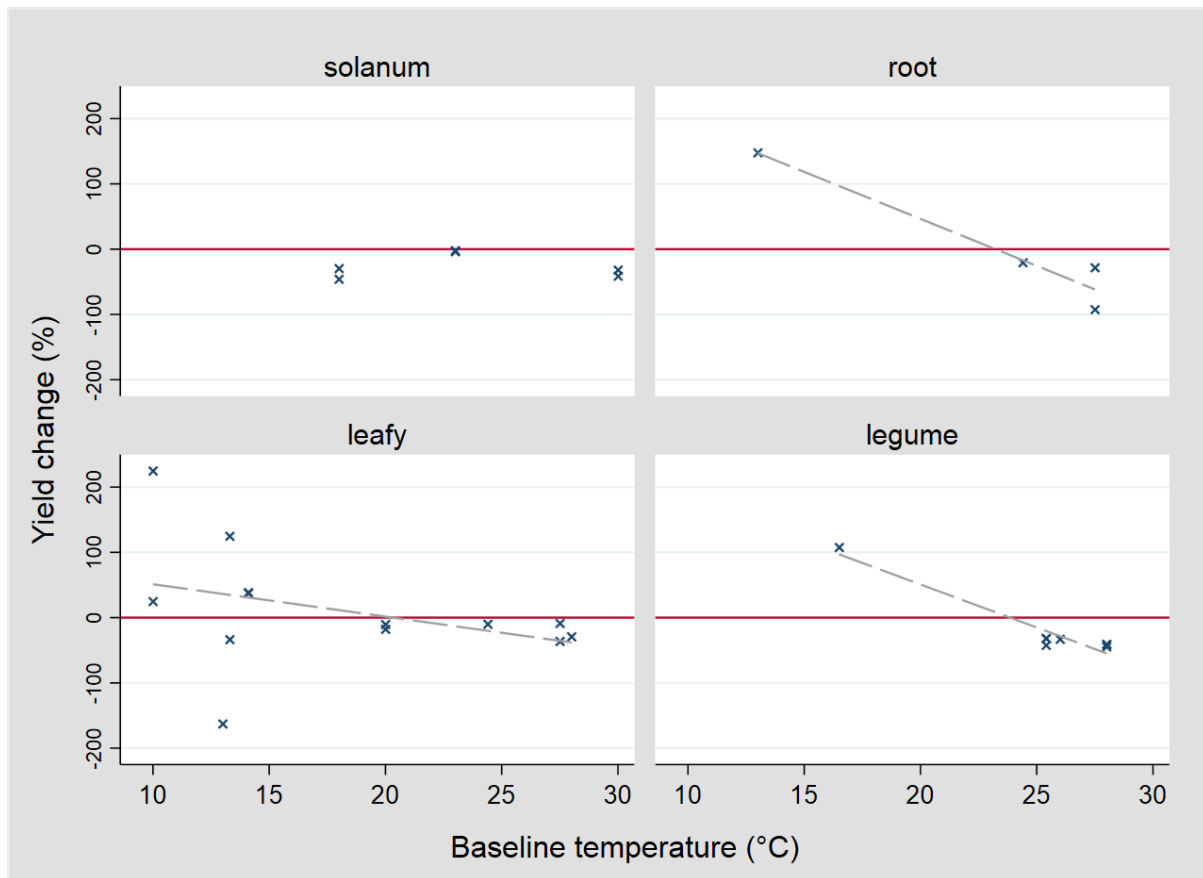

**B. Yield change per range of CO<sub>2</sub> concentration evaluated (exposure – baseline) of included experiments**

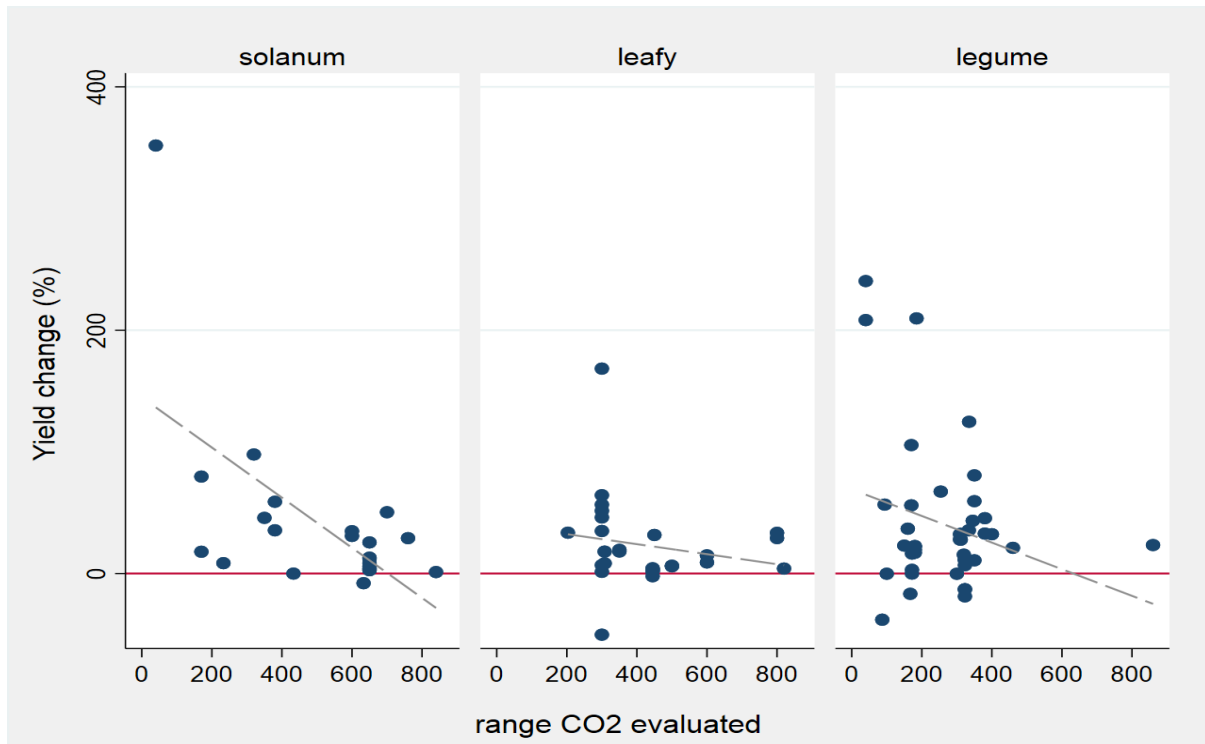

C. Yield change for standardised increase in O<sub>3</sub> per range of O<sub>3</sub> concentration evaluated (exposure – baseline) of included experiments

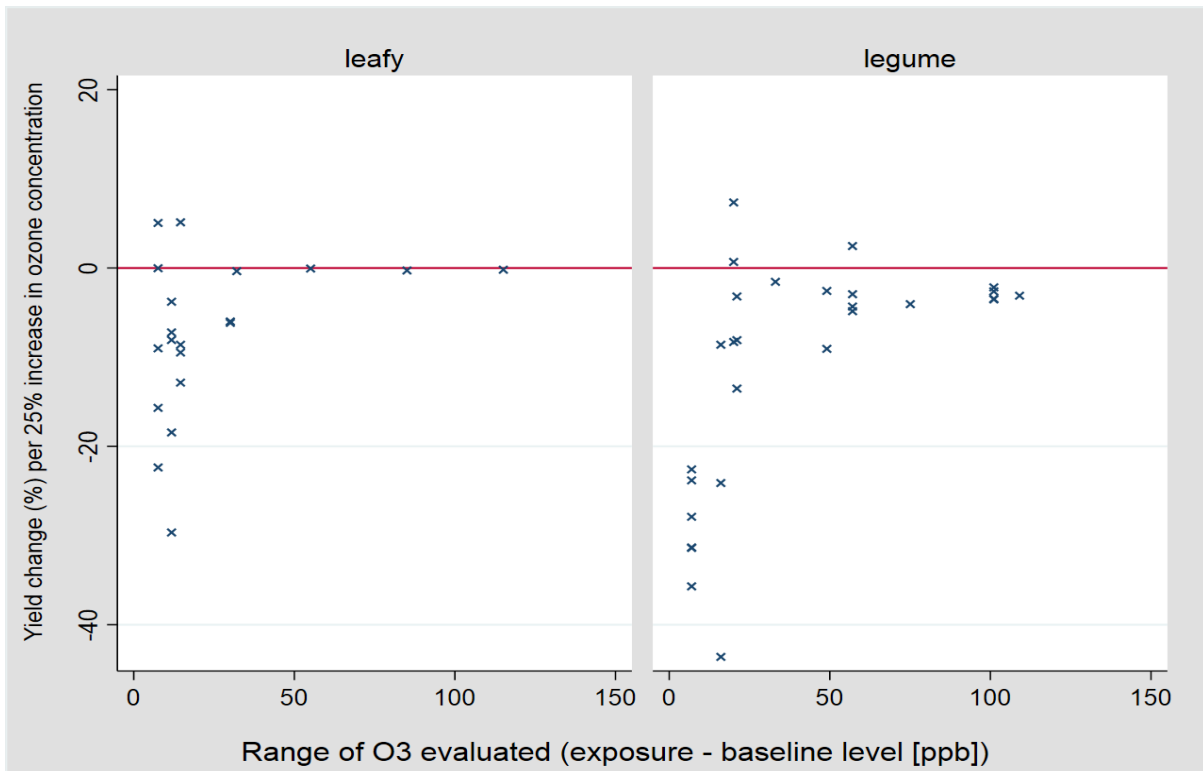



## Appendix 7 – Detailed Forest Plot Information Figure 3B and 4B

Forest plot yield changes in vegetables and legumes resulting from a standardised increase of 250ppm CO<sub>2</sub> concentration

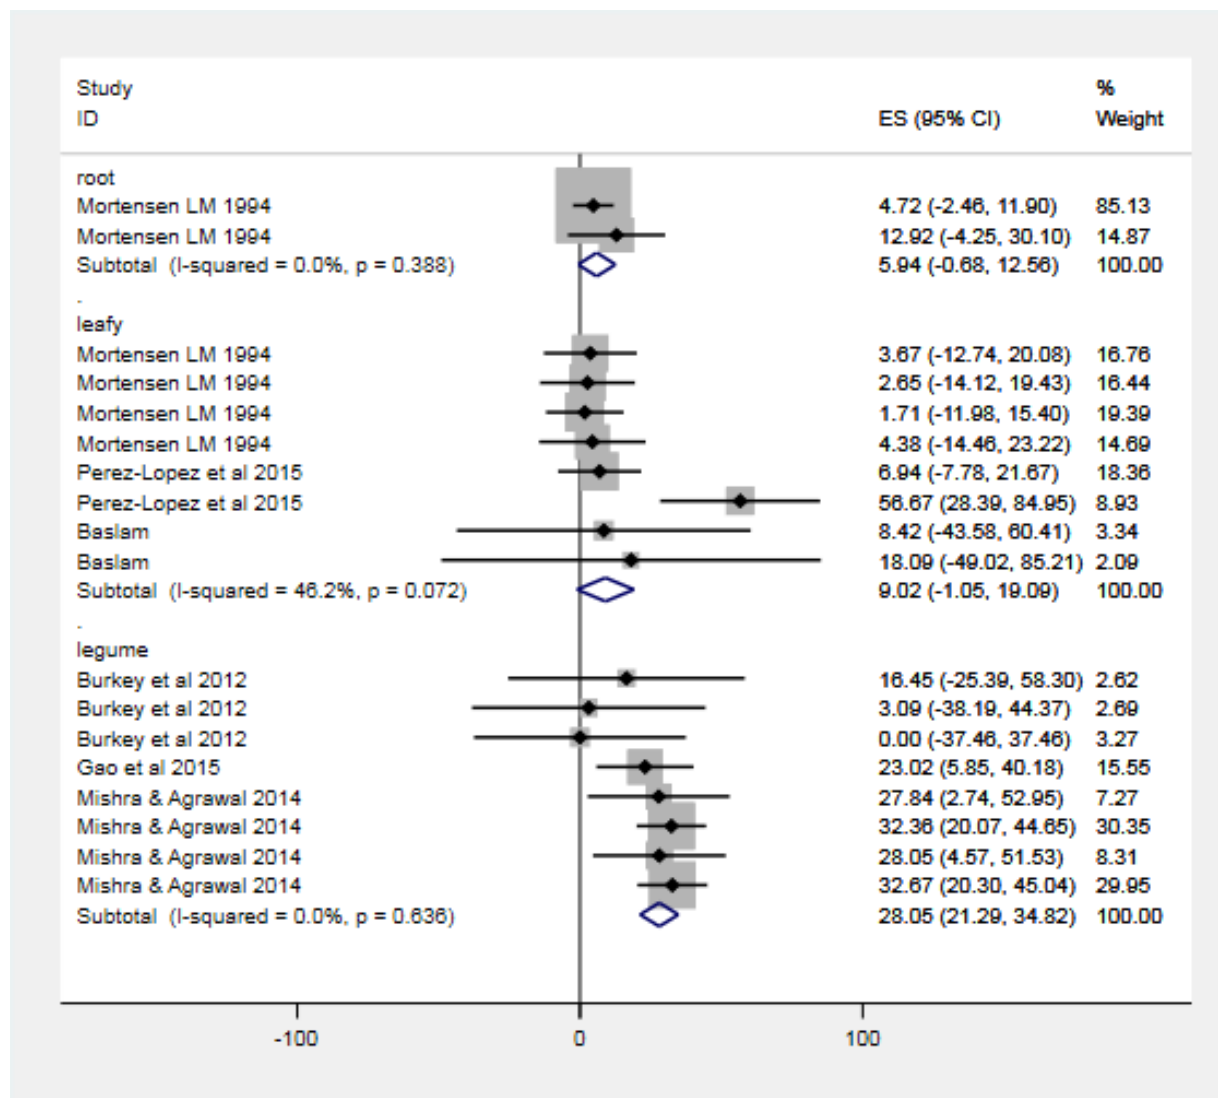

Forest plot yield changes in vegetables and legumes resulting from a standardised 25% increase in O<sub>3</sub> concentration

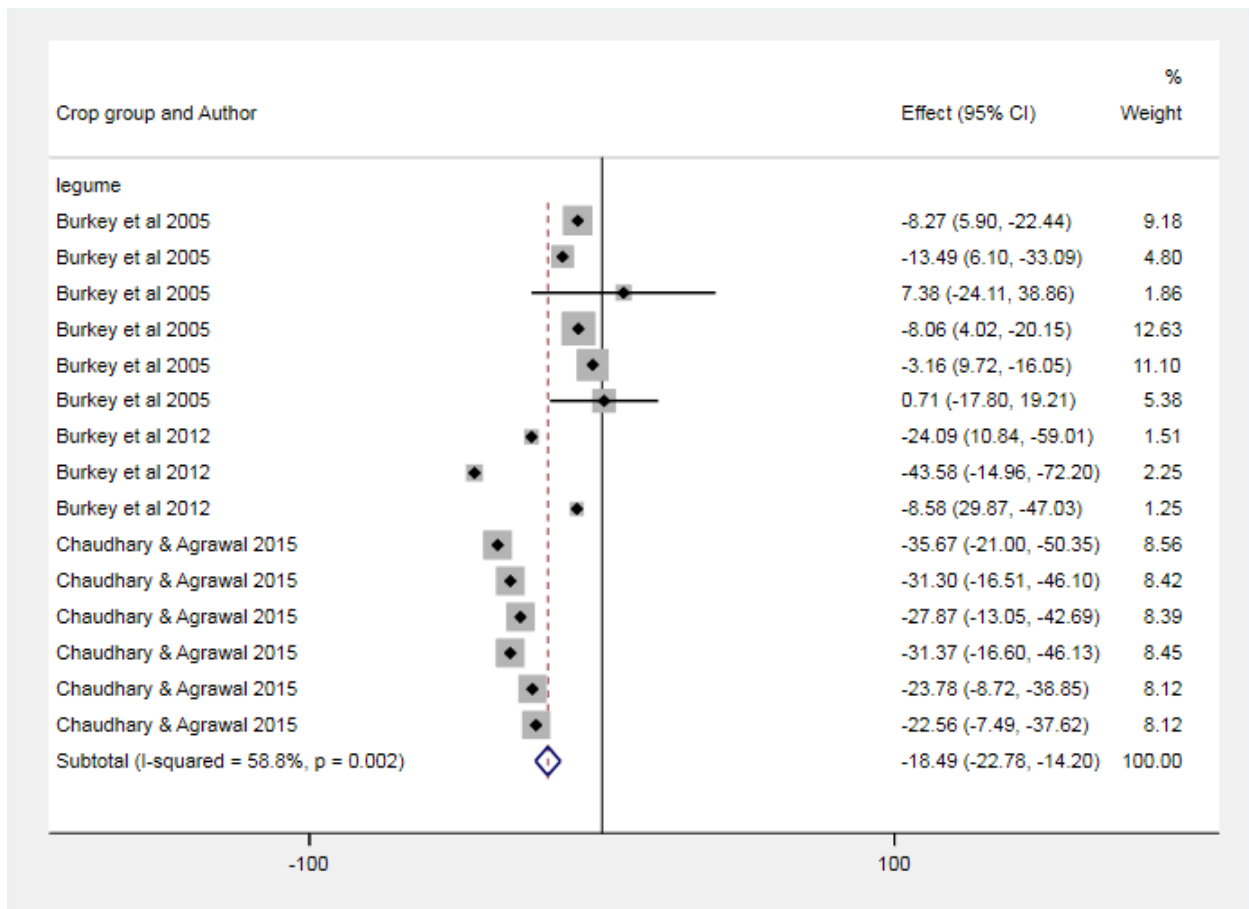

## Appendix 8 - Funnel Plots Meta-Analysis

### A. Funnel plot meta-analysis increased 250ppm increase in CO2 concentration on the yield of three vegetable and legume groups

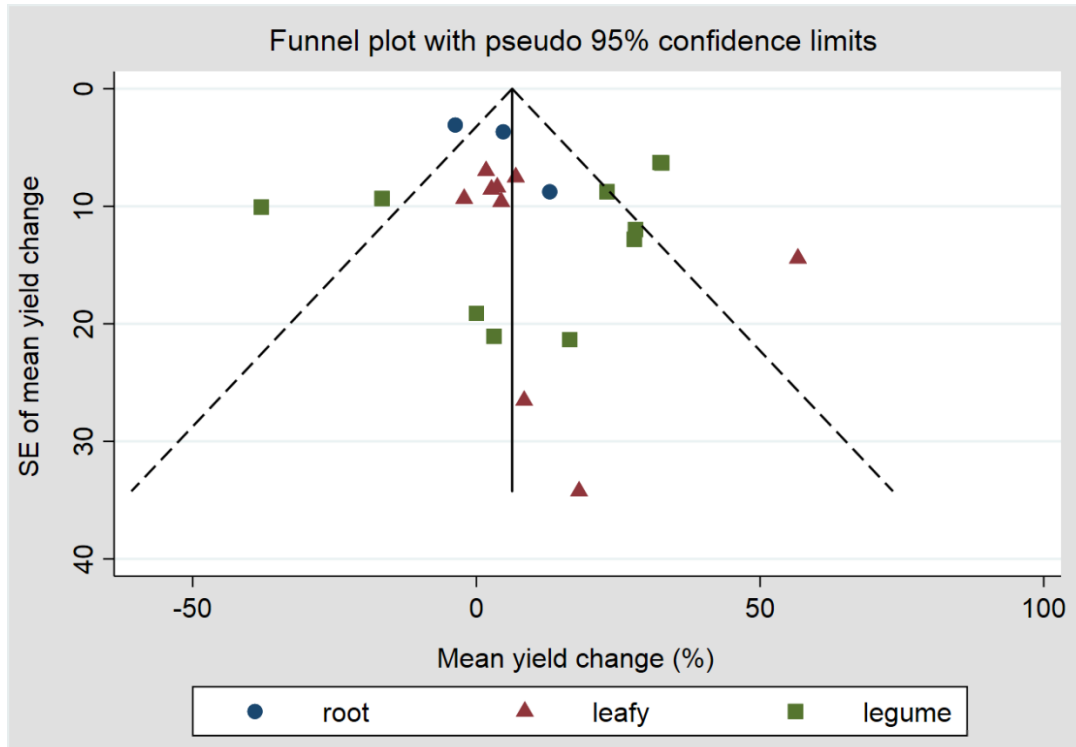

**B. Funnel Plot meta-analysis of a 250ppm standardised increase in CO<sub>2</sub> concentration on nutritional quality parameters in leafy vegetables**

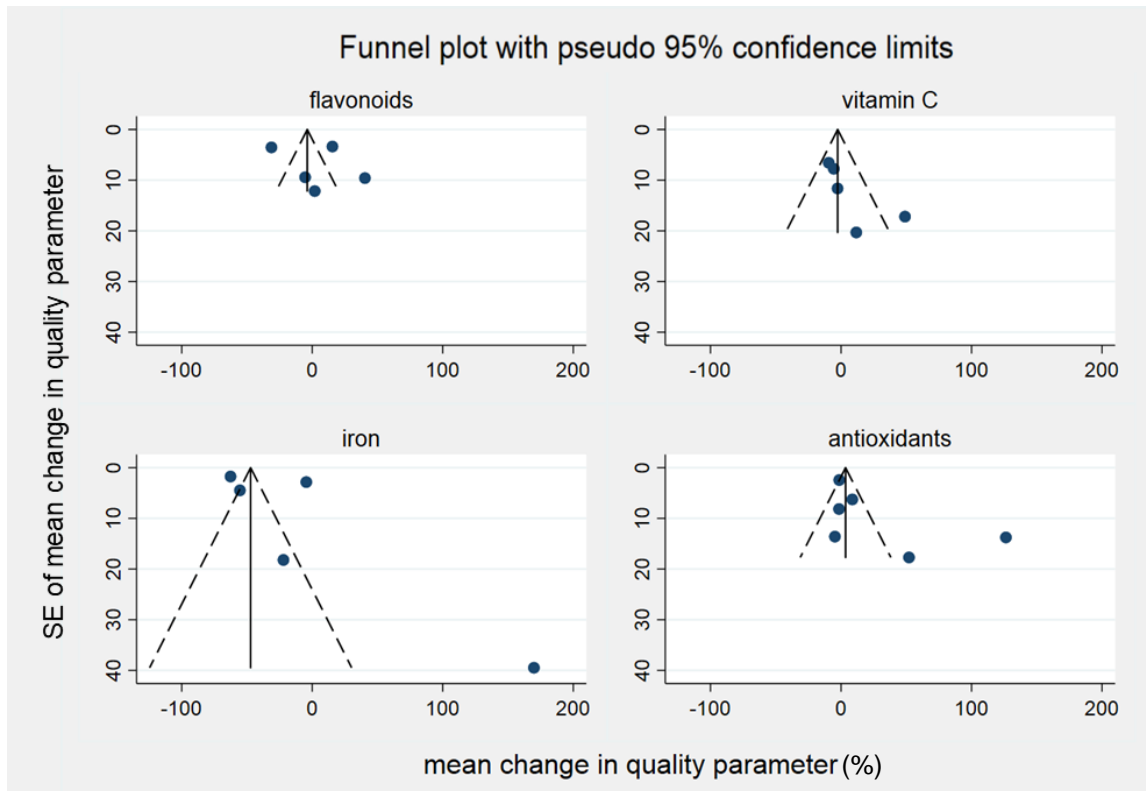

C. Funnel plot meta-analysis 25% increase in O<sub>3</sub> concentration on the yield of legumes

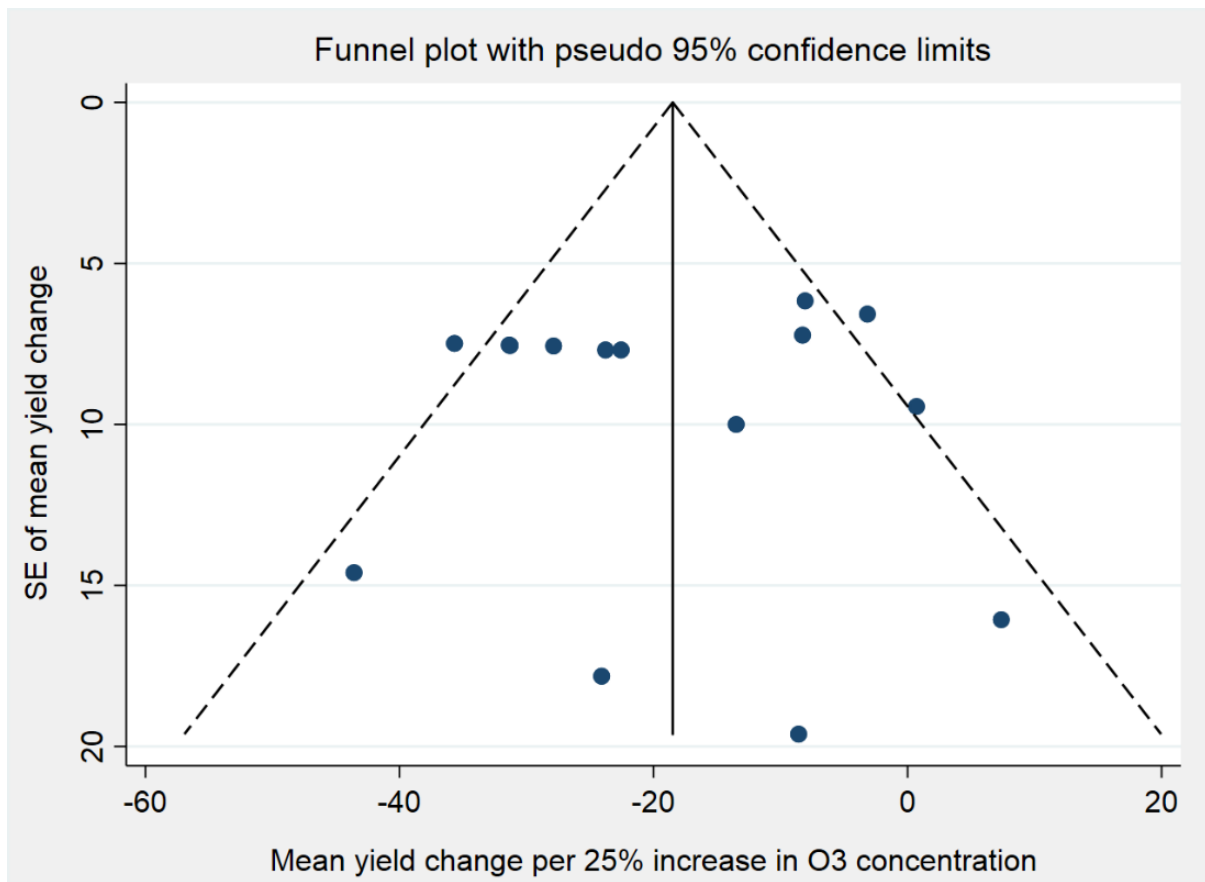

**D. Funnel Plot meta-analysis of reduced water availability and Vitamin C concentration in *Solanaceae***

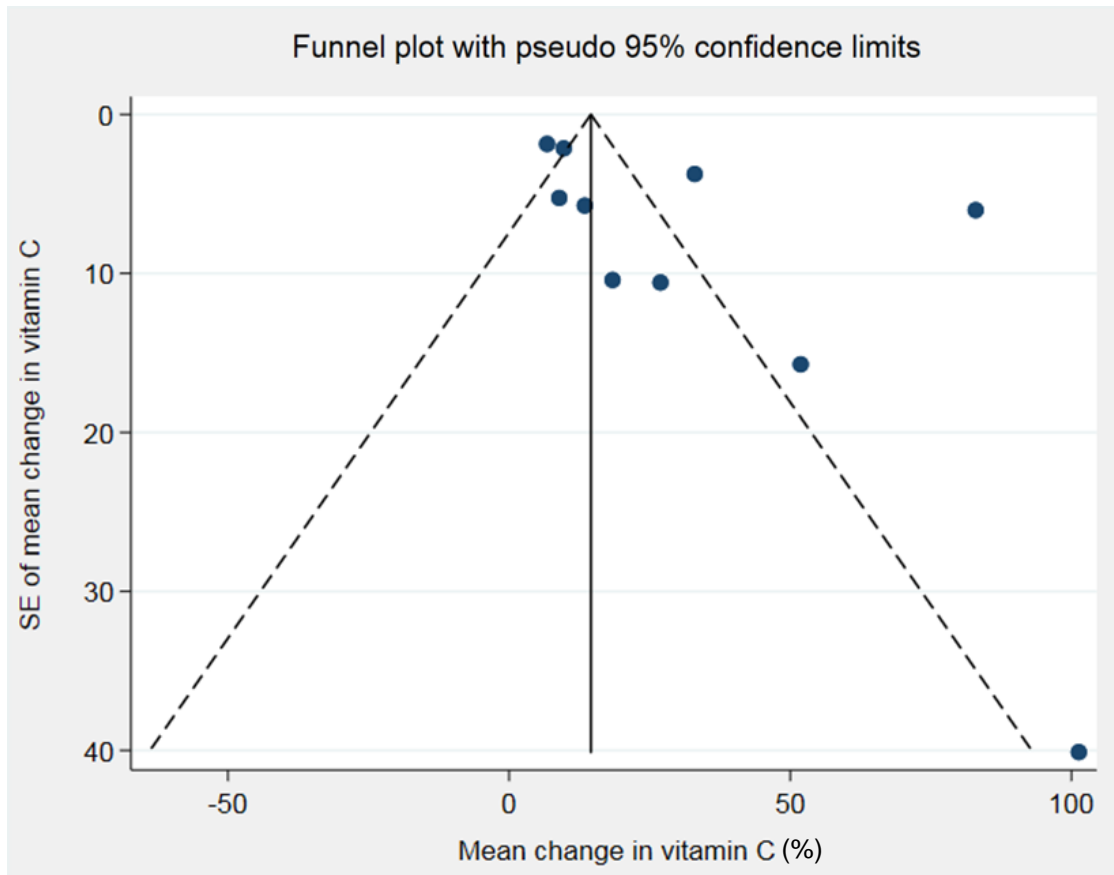

## Appendix 9 – Additional Analyses Nutritional Quality

### A. Dot plot showing the available experimental evidence of changes in nutritional quality in vegetables resulting from a standardised 250ppm increase in CO2 concentration

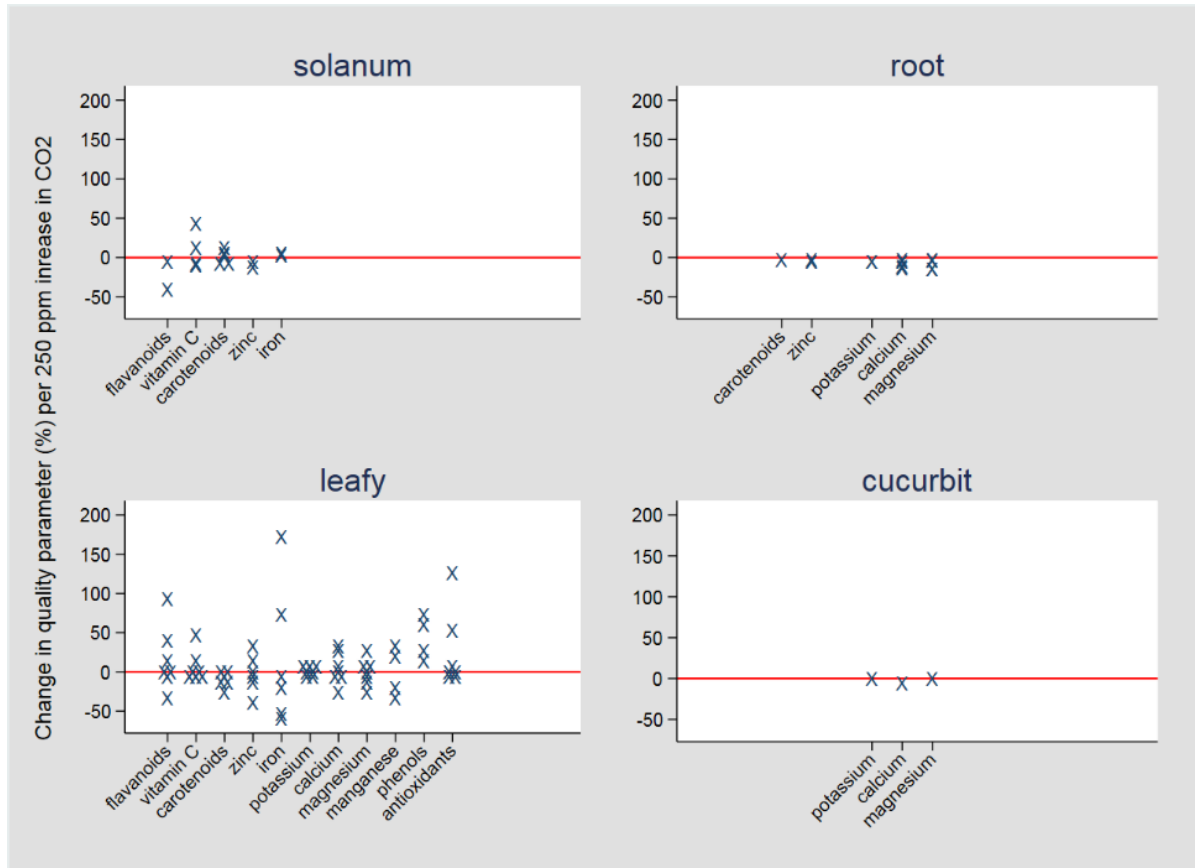

**B. Effect of a 25% increase in O<sub>3</sub> exposure on three quality parameters in leafy vegetables**

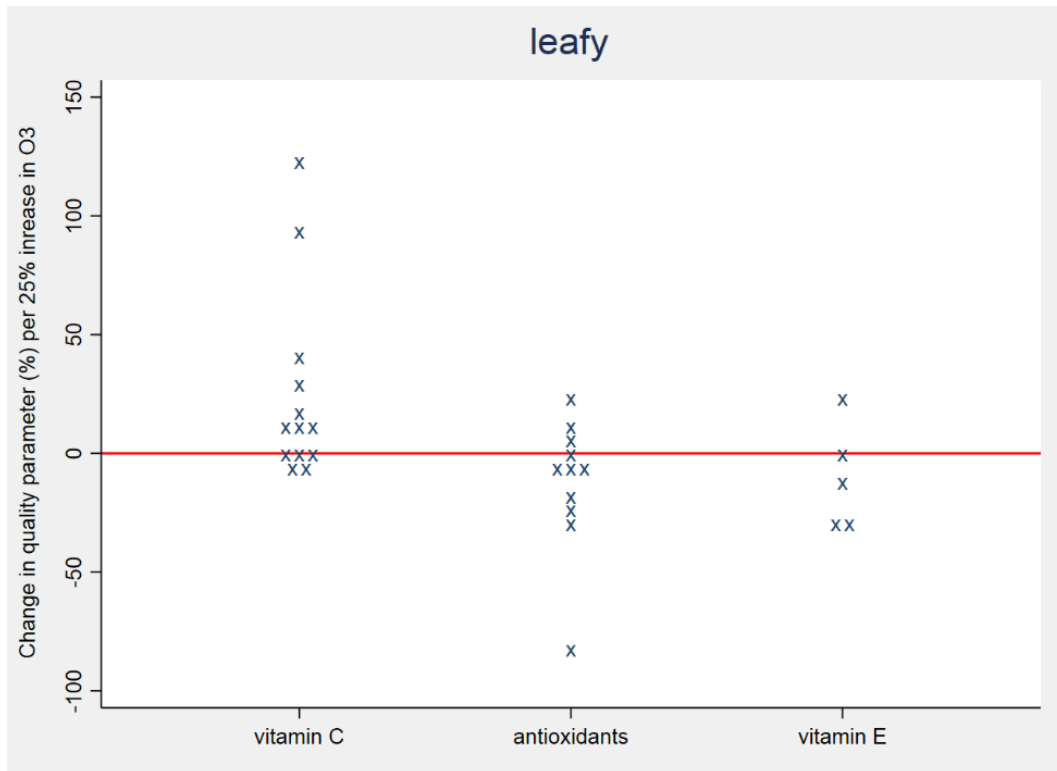



C. Dot plot showing the difference in nutritional quality parameters for three crop groups under a standardised 50% reduction in water availability

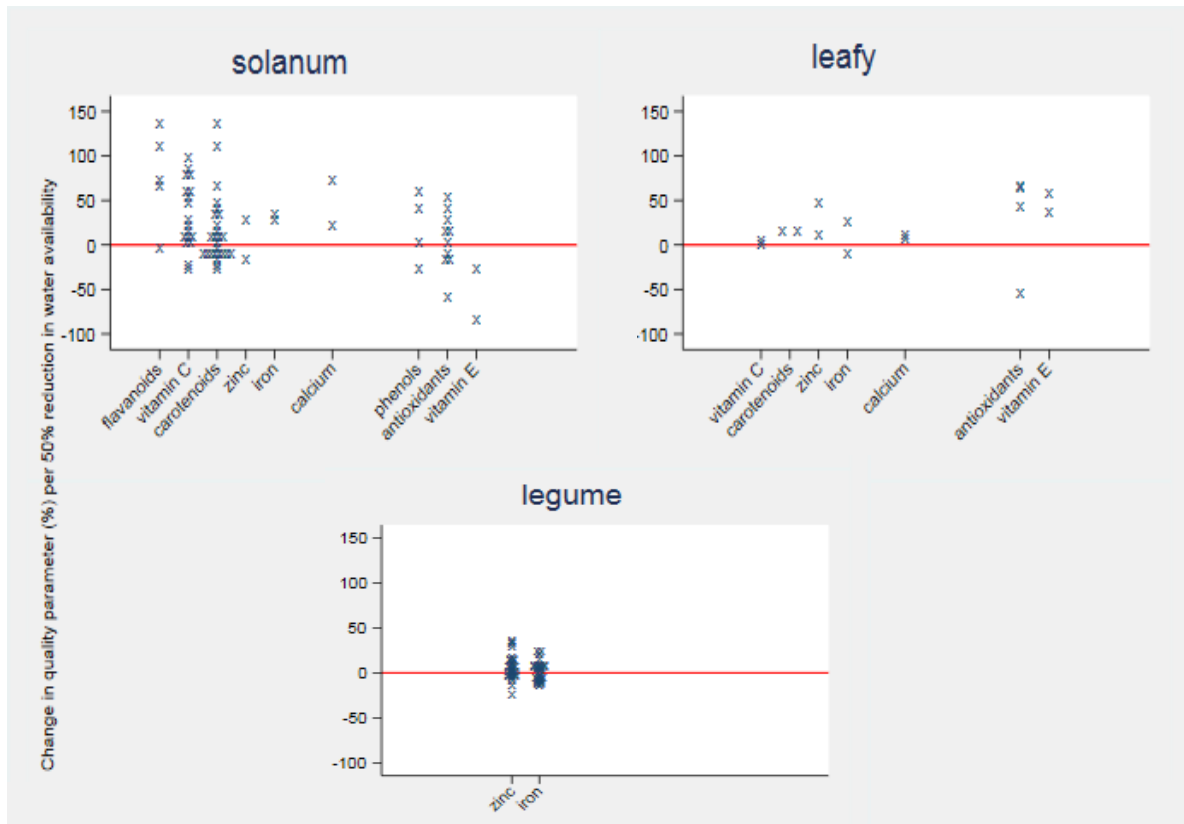

**D. Forest plot showing the effect of a 50% decrease in water availability on changes vitamin C concentration of Solanaceae**

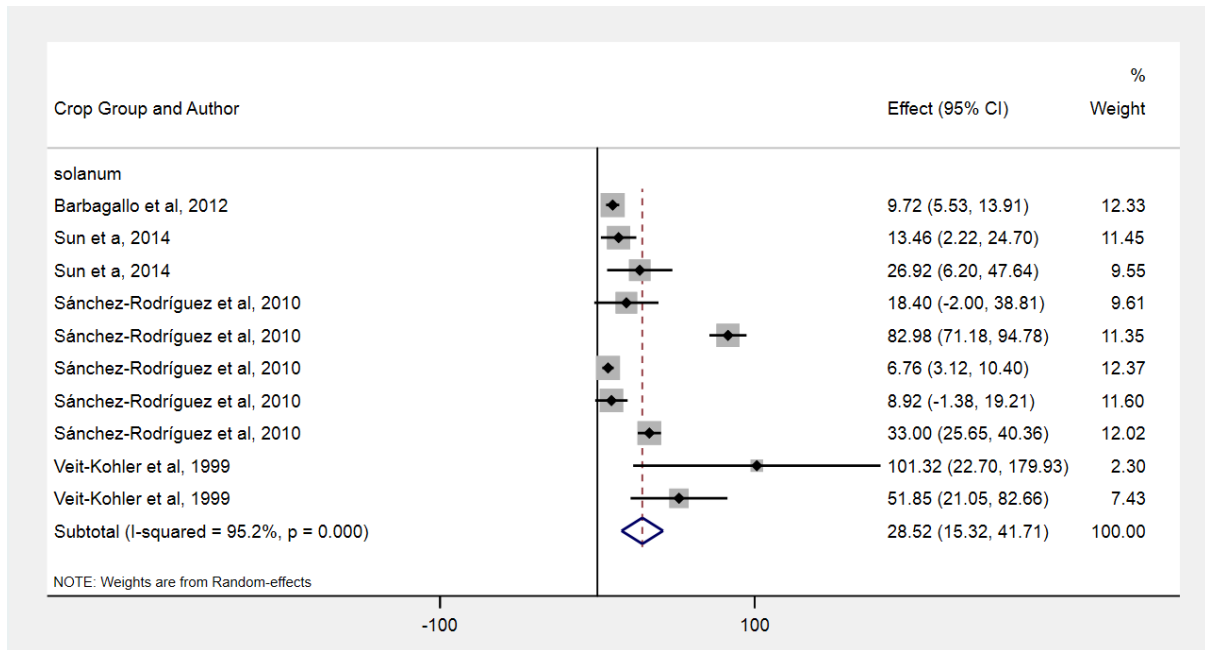

**E. Effect of a 25% increase in salinity exposure on quality parameters in leafy vegetables and *Solanaceae***

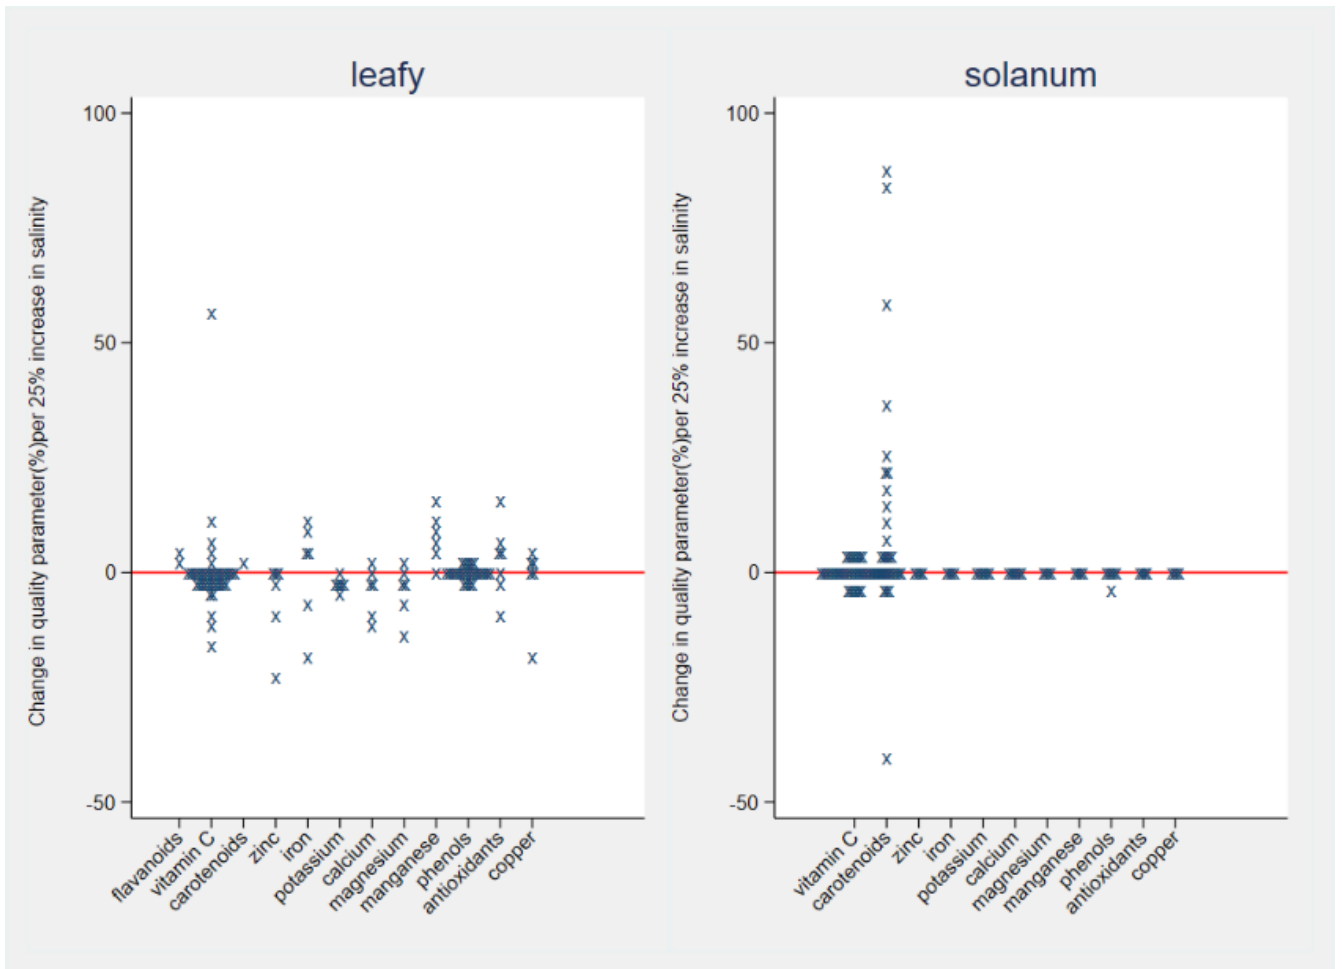

## Appendix 10 – Results combined impact of multiple environmental exposures

| Environmental exposure combinations                                  |                         | n<br>(experiments) | Direction of<br>effect on<br>yield |
|----------------------------------------------------------------------|-------------------------|--------------------|------------------------------------|
| Increased CO <sub>2</sub> & O <sub>3</sub> concentrations            | <i>Root vegetables</i>  | 3                  | ±                                  |
|                                                                      | <i>Leafy vegetables</i> | 12                 | -                                  |
| Increased CO <sub>2</sub> concentrations & elevated salinity levels  | <i>Solanaceae</i>       | 6                  | ±                                  |
|                                                                      | <i>Leafy vegetables</i> | 4                  | +                                  |
| Increased CO <sub>2</sub> concentration & reduced water availability | <i>Solanaceae</i>       | 9                  | +                                  |
|                                                                      | <i>Legumes</i>          | 3                  | ±                                  |
| Increased CO <sub>2</sub> concentration & elevated temperature       | <i>Root vegetables</i>  | 7                  | ±                                  |
|                                                                      | <i>Leafy vegetables</i> | 4                  | -                                  |
|                                                                      | <i>Legumes</i>          | 4                  | -                                  |

± Both positive and negative impacts on yields reported  
 - Negative impacts on yields reported  
 + Positive impacts on yields reported

## References

1. Collins M, Knutti R, Arblaster J, Dufresne J-L, Fichet T, Friedlingstein P, et al. Long-term climate change: projections, commitments and irreversibility. 2013.
2. Clarke L, Edmonds J, Jacoby H, Pitcher H, Reilly J, Richels R. Scenarios of greenhouse gas emissions and atmospheric concentrations. US Department of Energy Publications. 2007:6.
3. Riahi K, Grübler A, Nakicenovic N. Scenarios of long-term socio-economic and environmental development under climate stabilization. *Technological Forecasting and Social Change*. 2007;74(7):887-935.
4. Kim MJ, Park RJ, Ho C-H, Woo J-H, Choi K-C, Song C-K, et al. Future ozone and oxidants change under the RCP scenarios. *Atmospheric Environment*. 2015;101:103-15.
5. Kawase H, Nagashima T, Sudo K, Nozawa T. Future changes in tropospheric ozone under Representative Concentration Pathways (RCPs). *Geophysical Research Letters*. 2011;38(5).
